# Supplementary material
Source: ML conference proceedings conference paper supplement (https://openreview.net/forum?id=CgXAophhEb)
Supplement: supplementary_material [file attachment]

## Sheet: AirQualityUCI
Date	Time	CO(GT)	PT08.S1(CO)	NMHC(GT)	C6H6(GT)	PT08.S2(NMHC)	NOx(GT)	PT08.S3(NOx)	NO2(GT)	PT08.S4(NO2)	PT08.S5(O3)	T	RH	AH
2004-03-10	18:00:00	2.6	1360	150	11.8817	1045.5	166	1056.25	113	1692	1267.5	13.6	48.875	0.757754
2004-03-10	19:00:00	2	1292.25	112	9.39716	954.75	103	1173.75	92	1558.75	972.25	13.3	47.7	0.725487
2004-03-10	20:00:00	2.2	1402	88	8.99782	939.25	131	1140	114	1554.5	1074	11.9	53.975	0.750239
2004-03-10	21:00:00	2.2	1375.5	80	9.2288	948.25	172	1092	122	1583.75	1203.25	11	60	0.786713
2004-03-10	22:00:00	1.6	1272.25	51	6.51822	835.5	131	1205	116	1490	1110	11.15	59.575	0.788794
2004-03-10	23:00:00	1.2	1197	38	4.74101	750.25	89	1336.5	96	1393	949.25	11.175	59.175	0.784772
2004-03-11	00:00:00	1.2	1185	31	3.6244	689.5	62	1461.75	77	1332.75	732.5	11.325	56.775	0.760312
2004-03-11	01:00:00	1	1136.25	31	3.32668	672	62	1453.25	76	1332.75	729.5	10.675	60	0.770238
2004-03-11	02:00:00	0.9	1094	24	2.33942	608.5	45	1579	60	1276	619.5	10.65	59.675	0.764819
2004-03-11	03:00:00	0.6	1009.75	19	1.69666	560.75	-200	1705	-200	1234.75	501.25	10.25	60.2	0.751657
2004-03-11	04:00:00	-200	1011	14	1.29362	526.75	21	1817.5	34	1196.75	445.25	10.075	60.475	0.746495
2004-03-11	05:00:00	0.7	1066	8	1.13343	512	16	1918	28	1182	421.75	11	56.175	0.73656
2004-03-11	06:00:00	0.7	1051.75	16	1.60377	553.25	34	1738.25	48	1221.25	471.5	10.45	58.125	0.735295
2004-03-11	07:00:00	1.1	1144	29	3.24362	667	98	1489.75	82	1339	729.75	10.2	59.6	0.741736
2004-03-11	08:00:00	2	1333.25	64	8.01377	899.75	174	1136	112	1517	1101.5	10.75	57.425	0.740795
2004-03-11	09:00:00	2.2	1351	87	9.54064	960.25	129	1079	101	1582.75	1027.75	10.5	60.6	0.769111
2004-03-11	10:00:00	1.7	1233.25	77	6.33578	827.25	112	1218	98	1445.75	859.75	10.8	58.35	0.755183
2004-03-11	11:00:00	1.5	1178.75	43	4.97158	762	95	1327.5	92	1361.75	670.5	10.5	57.925	0.735161
2004-03-11	12:00:00	1.6	1236	61	5.21692	774.25	104	1301.25	95	1401.25	664	9.525	66.775	0.795054
2004-03-11	13:00:00	1.9	1285.5	63	7.26993	868.5	146	1162.25	112	1536.75	799	8.3	76.425	0.839268
2004-03-11	14:00:00	2.9	1371	164	11.539	1033.5	207	983.25	128	1730.25	1036.5	8	81.15	0.873589
2004-03-11	15:00:00	2.2	1310	79	8.82622	932.5	184	1081.75	126	1646.5	946.25	8.325	79.8	0.877784
2004-03-11	16:00:00	2.2	1291.75	95	8.30141	911.5	193	1102.5	131	1590.75	956.75	9.7	71.15	0.856938
2004-03-11	17:00:00	2.9	1383	150	11.1516	1019.75	243	1008	135	1718.75	1104	9.775	67.625	0.818501
2004-03-11	18:00:00	4.8	1580.75	307	20.7992	1318.5	281	798.5	151	2083	1408.5	10.35	64.175	0.806544
2004-03-11	19:00:00	6.9	1775.5	461	27.3598	1487.75	383	702.25	172	2332.5	1704	9.65	69.3	0.831921
2004-03-11	20:00:00	6.1	1640	401	24.0178	1404	351	742.75	165	2191.25	1653.75	9.65	67.75	0.813314
2004-03-11	21:00:00	3.9	1312.75	197	12.7794	1076.25	240	957.25	136	1706.5	1284.75	9.125	63.975	0.741924
2004-03-11	22:00:00	1.5	964.5	61	4.70707	748.5	94	1325.25	85	1332.5	821	8.175	63.4	0.690484
2004-03-11	23:00:00	1	912.75	26	2.64572	629.25	47	1564.5	53	1252.25	551.75	8.25	60.825	0.665744
2004-03-12	00:00:00	1.7	1080.25	55	5.8548	805	122	1253.5	97	1375	815.5	8.325	58.525	0.643764
2004-03-12	01:00:00	1.9	1043.75	53	6.3743	829	133	1247.25	110	1378.25	831.5	7.725	59.675	0.630766
2004-03-12	02:00:00	1.4	987.75	40	4.13234	718	82	1395.5	91	1303.5	691.5	7.125	61.8	0.627597
2004-03-12	03:00:00	0.8	888.75	21	1.86944	574.25	-200	1680.25	-200	1187	512	6.975	62.275	0.626108
2004-03-12	04:00:00	-200	831	10	1.06829	505.75	21	1892.75	32	1133.75	384	6.1	65.9	0.624754
2004-03-12	05:00:00	0.6	847.25	7	1.02241	501.25	30	1894.5	44	1154.75	394	6.275	64.975	0.623282
2004-03-12	06:00:00	0.8	927	17	1.83043	571.25	56	1684.75	71	1222.75	486.5	6.75	62.95	0.623428
2004-03-12	07:00:00	1.4	1090.5	33	4.35934	730.25	109	1387	104	1360.75	748.25	6.45	65.075	0.631628
2004-03-12	08:00:00	4.4	1587	202	17.8656	1235.5	307	896.5	141	1900.25	1400.25	7.325	63.15	0.649933
2004-03-12	09:00:00	-200	1544.5	-200	22.0742	1353	-200	767.25	-200	2058	1587.75	9.225	56.2	0.656065
2004-03-12	10:00:00	3.1	1350.25	208	14.027	1117.5	187	912	122	1711.75	1237	13.225	41.75	0.63195
2004-03-12	11:00:00	2.7	1262.75	166	11.6456	1037.25	216	969	143	1598.25	1166.5	14.325	38.45	0.624304
2004-03-12	12:00:00	2.1	1206.25	114	10.2247	986	143	1034.5	113	1537	959	15.025	36.5	0.619532
2004-03-12	13:00:00	2.5	1251.5	140	11.0399	1015.75	160	1007.5	116	1592.75	983	16.1	34.475	0.626165
2004-03-12	14:00:00	2.7	1287	169	12.8164	1077.5	163	948.75	123	1660.25	1060.75	16.275	35.725	0.656031
2004-03-12	15:00:00	2.9	1352.75	185	14.1739	1122.25	190	921.75	126	1740	1139.25	15.825	37.025	0.660961
2004-03-12	16:00:00	2.8	1309	165	12.6906	1073.25	178	954	120	1657.25	1112.25	15.875	37.175	0.665729
2004-03-12	17:00:00	2.4	1274	133	11.7384	1040.5	150	1005.75	119	1609.75	993.75	16.875	34.35	0.654909
2004-03-12	18:00:00	3.9	1509.5	233	19.291	1276.5	206	812.25	149	1909.75	1409.5	15.15	39.55	0.676627
2004-03-12	19:00:00	3.7	1525.25	242	18.2262	1246	202	821	145	1846.75	1447.75	14.4	43.425	0.70845
2004-03-12	20:00:00	6.6	1843	488	32.5563	1609.75	340	624	170	2390.25	1886.5	12.875	50.525	0.747803
2004-03-12	21:00:00	4.4	1597.75	333	20.0929	1299	274	752	149	1940.5	1626.75	12.15	53.35	0.75362
2004-03-12	22:00:00	3.5	1483.5	215	14.3213	1127	253	839	139	1723	1491	10.975	59.125	0.77398
2004-03-12	23:00:00	5.4	1677.25	367	21.8129	1346	300	740.5	134	2062	1657	9.675	64.625	0.777074
2004-03-13	00:00:00	2.7	1279.5	122	9.639	964	193	962.5	113	1543.5	1285.25	9.45	64.125	0.759747
2004-03-13	01:00:00	1.9	1196.25	67	7.37514	873	139	1071.25	97	1463.25	1144.25	9.15	63.9	0.742276
2004-03-13	02:00:00	1.6	1183.75	43	5.3696	781.75	83	1176.25	82	1364.5	1042.75	8.8	63.925	0.725615
2004-03-13	03:00:00	1.7	1171.75	46	5.3901	782.75	-200	1178.5	-200	1379.75	995.5	7.8	67.525	0.717312
2004-03-13	04:00:00	-200	1147	56	6.19904	821	109	1132.25	83	1411.75	991.5	7	71.075	0.715778
2004-03-13	05:00:00	1	978.25	30	2.57793	624.75	62	1420.25	65	1274.25	819.25	8.3	63.575	0.698155
2004-03-13	06:00:00	1.2	1099.5	27	2.90855	646.25	53	1406.25	60	1267.5	835	7.2	67.475	0.688672
2004-03-13	07:00:00	1.5	1112.25	47	5.13626	770.25	139	1228	77	1408.5	939.75	6.35	71.9	0.693199
2004-03-13	08:00:00	2.7	1335.5	132	11.8171	1043.25	256	935.25	96	1678	1191.75	6.45	71.55	0.694475
2004-03-13	09:00:00	3.7	1408.33	239	15.1402	1153	295	830.333	119	1776.67	1411	9.56667	59.6667	0.712367
2004-03-13	10:00:00	3.2	1447	160	12.9131	1080.75	250	868.5	126	1666.75	1465	12.375	51.175	0.733458
2004-03-13	11:00:00	4.1	1541.5	283	16.1335	1183.75	296	808.25	158	1779.75	1582.5	15.65	42.2	0.745094
2004-03-13	12:00:00	3.6	1451.25	210	14.0193	1117.25	239	875.25	161	1679.25	1387.25	18.4	33.825	0.708964
2004-03-13	13:00:00	2.8	1328.25	154	12.2797	1059.25	153	986.5	124	1599.5	1100.5	19.35	31.275	0.695008
2004-03-13	14:00:00	2	1206.5	112	8.61841	924.25	118	1087.75	102	1488.25	849.75	18.025	34.8	0.712674
2004-03-13	15:00:00	2	1239.5	108	9.19657	947	119	1049	116	1531.75	947	18.375	33.65	0.704207
2004-03-13	16:00:00	2.5	1306	111	10.2449	986.75	138	1004	124	1554	1078	17.625	35.1	0.701203
2004-03-13	17:00:00	2.3	1326	97	10.6118	1000.25	148	975.5	125	1601.5	1083.75	16.675	37.8	0.711736
2004-03-13	18:00:00	3.2	1472.75	191	15.4522	1162.75	227	830.5	148	1779	1394.75	16.1	41.025	0.745131
2004-03-13	19:00:00	4.2	1609	258	19.6368	1286.25	277	757.5	165	1922	1611.5	15.825	42.4	0.756914
2004-03-13	20:00:00	4.2	1610.75	284	19.2027	1274	279	754.25	161	1915	1697.25	15.65	44.1	0.778641
2004-03-13	21:00:00	4.2	1620.5	269	18.2693	1247.25	283	762	159	1860	1885.5	15.325	46.775	0.809124
2004-03-13	22:00:00	3.1	1444.25	180	13.1447	1088.5	214	844	143	1747.5	1623.75	14.65	48.625	0.805969
2004-03-13	23:00:00	2.6	1418	116	10.8734	1009.75	172	892	130	1603	1536.25	14.7	49.275	0.819336
2004-03-14	00:00:00	2.9	1533.5	93	10.9635	1013	190	888.5	129	1610.75	1534.75	13.95	53.6	0.849772
2004-03-14	01:00:00	2.8	1483.5	131	11.8602	1044.75	174	879.75	119	1624.25	1529.75	14.65	51.5	0.853623
2004-03-14	02:00:00	2.5	1366.75	92	8.62468	924.5	128	952.5	104	1543	1337	12.55	58.9	0.85374
2004-03-14	03:00:00	2.4	1344	132	9.73779	967.75	-200	920.5	-200	1619.75	1278.25	11.65	63.425	0.867449
2004-03-14	04:00:00	-200	1129.5	56	5.19165	773	70	1130.25	82	1451.75	1050.5	12.1	61.1	0.860316
2004-03-14	05:00:00	1.2	1062	32	3.65042	691	53	1271.5	70	1376.75	929	11.475	63.1	0.853275
2004-03-14	06:00:00	1	1075.75	29	2.48134	618.25	44	1395.25	63	1333	872.25	11.6	62.15	0.847264
2004-03-14	07:00:00	0.9	1028.25	27	2.42998	614.75	74	1383.5	67	1340	853	10.4	67.65	0.852999
2004-03-14	08:00:00	1.4	1154.5	36	4.21051	722.25	101	1224.75	84	1413.75	959.25	11.575	62.675	0.853038
2004-03-14	09:00:00	1.6	1235.25	57	6.35228	828	118	1055.25	83	1527	1093.25	12.425	60	0.862715
2004-03-14	10:00:00	2.2	1331.5	129	8.58711	923	144	951.75	98	1613.75	1225	14.525	53.075	0.872782
2004-03-14	11:00:00	2.8	1444.75	148	10.8595	1009.25	176	878.25	114	1696	1355.25	16.875	46.1	0.878931
2004-03-14	12:00:00	2.8	1415.5	145	10.6598	1002	161	906.75	119	1676.5	1261.5	19.3	38.25	0.847405
2004-03-14	13:00:00	2	1281.25	93	7.54007	880	113	1083.75	104	1525	980	21.175	31.45	0.781196
2004-03-14	14:00:00	1.8	1207.25	84	7.5046	878.5	103	1103.5	102	1489.5	872.25	21.425	30.2	0.761592
2004-03-14	15:00:00	1.9	1257.75	99	8.16011	905.75	112	1081.25	107	1511	900.25	21.925	28.95	0.752459
2004-03-14	16:00:00	3	1457.75	150	11.8674	1045	170	973.75	129	1646	1098.5	22.225	28.4	0.751627
2004-03-14	17:00:00	2.9	1437.75	156	12.033	1050.75	180	942.5	128	1667.5	1206.25	21.3	30.75	0.769615
2004-03-14	18:00:00	2.5	1477.75	122	12.1633	1055.25	160	929.25	121	1670.75	1262.25	19.65	36.7	0.830706
2004-03-14	19:00:00	4.6	1807.5	262	20.5717	1312.25	261	753.25	157	1992.75	1697.75	18.375	41.725	0.873196
2004-03-14	20:00:00	5.9	1898	341	23.1421	1381.25	325	680.5	173	2102.75	1904.75	17.625	46.1	0.920954
2004-03-14	21:00:00	3.4	1559.5	214	14.7205	1139.75	217	783.75	146	1817.5	1648	16.65	49.575	0.93199
2004-03-14	22:00:00	2.1	1324.25	100	9.0042	939.5	146	923.5	121	1587	1422.75	16.25	50.95	0.934147
2004-03-14	23:00:00	2.2	1348.75	79	8.83889	933	152	933	119	1616.5	1348.75	14.725	55.925	0.931386
2004-03-15	00:00:00	1.8	1238.75	66	7.35756	872.25	104	985	99	1546.5	1250.25	14.825	54.675	0.916354
2004-03-15	01:00:00	1.8	1239	73	6.91821	853.25	106	1010.25	93	1543.25	1173.75	14.05	57	0.909449
2004-03-15	02:00:00	1.8	1223.75	66	6.95819	855	108	998.25	88	1565.75	1148.75	13.35	61.35	0.936086
2004-03-15	03:00:00	1.1	1078.25	44	4.42986	734	-200	1128.25	-200	1486.75	1020.5	12.6	63.475	0.923017
2004-03-15	04:00:00	-200	1077.5	44	3.99592	710.5	66	1150	71	1467.5	1012.75	12.35	65.35	0.935112
2004-03-15	05:00:00	1	1074.5	39	3.86591	703.25	88	1155.75	74	1463.75	1010	11.9	67.45	0.937538
2004-03-15	06:00:00	1.4	1156.75	51	6.38532	829.5	138	1029.5	80	1584	1083	11.375	70.525	0.947516
2004-03-15	07:00:00	2.2	1314	107	9.68505	965.75	228	896.75	89	1710.25	1234.75	11.325	70.2	0.940095
2004-03-15	08:00:00	5.5	1796.75	336	25.8705	1451	360	652	114	2323	1679.5	12.4	63.875	0.916955
2004-03-15	09:00:00	8.1	1961.25	618	36.6921	1701	478	536.75	149	2665.25	2184.25	14.775	54.325	0.90761
2004-03-15	10:00:00	5.8	1770.5	438	26.636	1470	394	621.5	157	2261.5	1973	17.4	45.65	0.899298
2004-03-15	11:00:00	4.2	1563.5	334	20.1109	1299.5	319	709.75	155	2029	1798.25	19.8	38.525	0.88006
2004-03-15	12:00:00	3.1	1430	221	14.0965	1119.75	201	830.5	134	1783.25	1522	22.025	34.05	0.890369
2004-03-15	13:00:00	2.9	1417.25	207	14.9257	1146.25	171	829.5	119	1830.5	1404	23.325	32.175	0.909599
2004-03-15	14:00:00	2.9	1400.25	191	15.4361	1162.25	159	838.25	111	1828.5	1263.25	23.875	29.975	0.875659
2004-03-15	15:00:00	2.5	1317.25	185	12.0909	1052.75	153	926	104	1706.75	1137	24.45	28.9	0.873592
2004-03-15	16:00:00	2.3	1317.75	141	11.5248	1033	143	949.75	99	1675	1068	24.375	29.4	0.884762
2004-03-15	17:00:00	2.8	1445.25	214	14.7598	1141	156	856.5	110	1823.5	1251.5	23.85	31.325	0.913735
2004-03-15	18:00:00	6.1	1917	471	32.1488	1600.5	314	631.25	162	2447	1843.25	22.55	35.375	0.9547
2004-03-15	19:00:00	8	2039.75	685	39.2023	1754.25	404	542.25	187	2679	2122.25	20.425	42.5	1.00863
2004-03-15	20:00:00	6.5	1894.75	538	30.9613	1573.25	320	565	165	2442.75	1991.5	18.275	52.625	1.09452
2004-03-15	21:00:00	4.2	1594.5	319	19.8956	1293.5	256	678.25	145	2057.5	1707	16.65	57.375	1.07863
2004-03-15	22:00:00	3.2	1438.5	224	15.3159	1158.5	193	764.25	125	1856.25	1494.25	15.7	60.15	1.06537
2004-03-15	23:00:00	1.4	1141.5	67	6.8954	852.25	89	1008.25	101	1547.25	1164.25	15.25	61.45	1.05796
2004-03-16	00:00:00	2.1	1303.67	155	11.1399	1019.33	127	852.333	103	1731.33	1271.67	14.0667	65.7	1.04937
2004-03-16	01:00:00	1.2	1074.25	49	5.4055	783.5	79	1097.75	88	1483	1039.75	14.825	60.55	1.01482
2004-03-16	02:00:00	0.8	968	29	2.81069	640	43	1319.5	61	1385.75	866.75	14.75	59.225	0.987908
2004-03-16	03:00:00	0.7	929.25	25	2.32506	607.5	-200	1375.5	-200	1364.25	825.75	13.625	62.05	0.963555
2004-03-16	04:00:00	-200	941	25	2.58918	625.5	59	1315.75	59	1373.25	839.75	12.325	66.15	0.945036
2004-03-16	05:00:00	0.6	937	17	2.00874	584.75	38	1411.5	52	1348	792.5	12.75	63.225	0.92829
2004-03-16	06:00:00	0.9	1017	27	3.48269	681.25	82	1245.75	64	1417.5	869.5	11.175	68.475	0.908107
2004-03-16	07:00:00	1.3	1171.25	50	5.13123	770	99	1161.75	70	1466.75	930	10.975	66.5	0.870523
2004-03-16	08:00:00	3.4	1541	218	16.1745	1185	263	770	97	1888.75	1406.5	11.675	63.65	0.871937
2004-03-16	09:00:00	3.7	1539.25	285	19.6635	1287	229	697.5	95	2054.75	1507	13.625	56.3	0.874265
2004-03-16	10:00:00	5.3	1734.75	437	25.0552	1430.5	396	628.25	150	2211	1843.25	17.825	42.875	0.867225
2004-03-16	11:00:00	4.1	1571	327	20.0031	1296.5	314	730	162	1972.75	1729	21.45	33.325	0.841671
2004-03-16	12:00:00	3.3	1451.75	283	18.3471	1249.5	217	775.5	154	1868.25	1583.25	24.375	27.35	0.823069
2004-03-16	13:00:00	4	1579	366	22.3086	1359.25	252	724	161	1997.75	1670.75	25.25	26.075	0.826381
2004-03-16	14:00:00	3.8	1466.25	318	20.4448	1308.75	263	772.5	161	1897	1491.25	25.825	23.15	0.758937
2004-03-16	15:00:00	2.8	1279.75	228	14.6104	1136.25	180	892.75	128	1675.25	1239.75	27	20.2	0.709362
2004-03-16	16:00:00	2.9	1407	201	16.5533	1196.5	184	905.25	129	1758.75	1313	28.25	18.575	0.701386
2004-03-16	17:00:00	2.9	1388.75	199	15.7832	1173	190	898.25	133	1739	1363.25	27.975	19.1	0.709825
2004-03-16	18:00:00	3.4	1447.25	237	17.8399	1234.75	184	858.75	139	1778	1295.75	23.9	25.7	0.751891
2004-03-16	19:00:00	3.9	1551	261	19.0971	1271	181	800.25	137	1874.5	1432.25	21.35	34.775	0.872993
2004-03-16	20:00:00	3.2	1473.5	230	15.767	1172.5	166	854.25	143	1776	1431.75	20.425	36.675	0.870389
2004-03-16	21:00:00	5.1	1799.5	349	24.8777	1426	317	700	177	2105.5	2033.5	19.025	41.35	0.900731
2004-03-16	22:00:00	2.6	1379.25	183	13.5296	1101.25	184	817.5	138	1710	1601.75	17.925	45.9	0.934186
2004-03-16	23:00:00	1.7	1200.5	88	9.08735	942.75	130	935	117	1559.75	1361.75	16.7	48.925	0.92265
2004-03-17	00:00:00	1.7	1204.75	85	8.63095	924.75	132	922	107	1546.5	1314.25	15.525	52.925	0.927128
2004-03-17	01:00:00	1.2	1071.5	47	5.41578	784	95	1065.5	90	1441.75	1113.75	15.475	51.875	0.905875
2004-03-17	02:00:00	0.9	997.75	34	4.05026	713.5	70	1169.25	79	1383.25	991.5	14.125	55.575	0.890956
2004-03-17	03:00:00	0.7	933.25	26	2.58168	625	-200	1291.5	-200	1331.5	883.75	13.05	57.9	0.866633
2004-03-17	04:00:00	-200	882.75	17	1.89893	576.5	54	1396	60	1303.25	808.25	12.65	57.9	0.84466
2004-03-17	05:00:00	0.5	868.75	11	1.60683	553.5	28	1459.5	40	1267.75	667	11.825	58.025	0.802632
2004-03-17	06:00:00	0.5	890.75	18	1.89565	576.25	46	1416.5	53	1289.25	733	11.9	57.4	0.797846
2004-03-17	07:00:00	1.6	1172.75	84	7.48689	877.75	160	1038	84	1556.25	1051.75	9.9	65.2	0.795646
2004-03-17	08:00:00	4.1	1587.25	260	21.3588	1333.75	320	702.25	108	1998.75	1533.5	11.125	60.2	0.795776
2004-03-17	09:00:00	6.6	1851.5	534	36.4484	1695.75	377	552.75	127	2535.25	1931	14.125	50.025	0.80198
2004-03-17	10:00:00	4.3	1521.5	368	21.2666	1331.25	280	702.5	134	2025.75	1733.75	17.7	40.1	0.804829
2004-03-17	11:00:00	2.9	1438.25	200	15.388	1160.75	221	818.5	135	1781.5	1595	21.1	33.425	0.826486
2004-03-17	12:00:00	2.5	1393.25	145	12.4991	1066.75	210	905	142	1654.25	1489.75	24.3	28.275	0.847128
2004-03-17	13:00:00	2.8	1452	188	15.1083	1152	204	860.5	153	1747	1507.5	25.575	25.55	0.825395
2004-03-17	14:00:00	2.6	1389.25	152	13.7353	1108	161	886.5	123	1711.5	1334	25.85	25.9	0.850339
2004-03-17	15:00:00	2	1207	103	10.4345	993.75	135	1013	104	1519.5	1044.75	26.825	18.7	0.650018
2004-03-17	16:00:00	2.9	1365.25	193	15.1641	1153.75	186	939.5	129	1678.5	1221.25	29.275	15.75	0.63089
2004-03-17	17:00:00	2.5	1247	134	12.3088	1060.25	147	1032	114	1524.75	1068.5	28.5	14.9	0.570802
2004-03-17	18:00:00	5	1556.75	386	26.951	1477.75	299	793	158	1980.5	1568.5	25.85	15.95	0.523665
2004-03-17	19:00:00	7.6	1972.5	577	38.3932	1737.25	411	616.75	194	2413.75	2305.5	23.125	26.5	0.740261
2004-03-17	20:00:00	6.7	1974.75	523	35.1036	1666.5	347	596.75	182	2415.5	2358.5	20.525	38.25	0.913314
2004-03-17	21:00:00	5.7	1794.75	472	27.2471	1485	336	652.5	180	2174	2050	19.05	42.6	0.929388
2004-03-17	22:00:00	2.8	1443.75	206	15.0447	1150	202	769.5	136	1726.5	1726.5	17.15	44.125	0.855831
2004-03-17	23:00:00	2.6	1488	216	15.7103	1170.75	178	731	127	1777.5	1705	16.025	50.925	0.920599
2004-03-18	00:00:00	2.3	1371.25	159	12.9727	1082.75	154	795.75	116	1668.75	1550.5	14.8	53.925	0.902354
2004-03-18	01:00:00	1.4	1160.75	70	8.12342	904.25	92	946.75	107	1502	1240.25	14.275	55.45	0.897473
2004-03-18	02:00:00	1	1064.25	44	5.4776	787	61	1056.75	88	1407	1115	14.75	52.075	0.868642
2004-03-18	03:00:00	0.7	970.25	42	3.5812	687	-200	1195.5	-200	1350.5	968.5	13.875	53.875	0.850059
2004-03-18	04:00:00	-200	954	28	2.88493	644.75	60	1260.25	78	1334	924.75	11.6	61.925	0.844196
2004-03-18	05:00:00	0.6	930.5	20	2.54804	622.75	37	1293.25	57	1306.5	827.75	12	58.85	0.823302
2004-03-18	06:00:00	0.7	938	26	2.97193	650.25	68	1251.25	71	1332.5	893	10.95	62.075	0.811277
2004-03-18	07:00:00	1.5	1166.25	78	7.66479	885.25	139	1005.25	85	1550.5	1075	10.575	63.25	0.806682
2004-03-18	08:00:00	4.7	1643	319	23.2568	1384.25	339	667	124	2093.75	1610.25	11.475	60.025	0.811693
2004-03-18	09:00:00	6.6	1934	506	35.7906	1681.5	421	540.5	151	2468.25	2050.5	14.275	50.575	0.81857
2004-03-18	10:00:00	4.5	1616.5	-200	21.3127	1332.5	349	685.75	150	2010	1818.5	17.85	40.525	0.820964
2004-03-18	11:00:00	2.8	1472.75	-200	14.3058	1126.5	224	830.5	152	1752	1567.75	20.8	34.45	0.836456
2004-03-18	12:00:00	2.2	1378.5	-200	12.5211	1067.5	171	898.75	139	1662.5	1373.5	23.85	28.175	0.821851
2004-03-18	13:00:00	2.2	1385.25	-200	12.1924	1056.25	149	891	133	1648	1267.5	24.15	28.675	0.851493
2004-03-18	14:00:00	2.3	1378.75	-200	13.0922	1086.75	137	901.25	126	1660.25	1143.5	25.15	24.85	0.782925
2004-03-18	15:00:00	2.2	1321.67	-200	14.3732	1128.67	149	933.667	128	1639.33	1109.33	27.0333	17.8333	0.627469
2004-03-18	16:00:00	2.8	1495.75	-200	16.8356	1205	172	822	169	1766.5	1347.25	27.125	23.125	0.818014
2004-03-18	17:00:00	2.7	1408.75	-200	14.4539	1131.25	166	873	149	1688.5	1205.75	25.8	23.925	0.783193
2004-03-18	18:00:00	3.7	1512.75	-200	21.5159	1338	214	764.25	156	1956.5	1397	23.05	26.775	0.744593
2004-03-18	19:00:00	5.1	1667	-200	26.4033	1464.25	280	683.25	168	2117.75	1588.25	20.725	31.125	0.752287
2004-03-18	20:00:00	5.1	1666.75	-200	25.9606	1453.25	276	683.5	176	2051	1568.5	18.6	36.175	0.767639
2004-03-18	21:00:00	3.2	1430.25	-200	14.1429	1121.25	178	814	135	1731.5	1321.5	16.05	48.425	0.87678
2004-03-18	22:00:00	2.1	1333.25	-200	10.3057	989	129	885.25	121	1620.75	1194	14.45	57.775	0.945558
2004-03-18	23:00:00	1.7	1261.5	-200	8.27677	910.5	95	948.25	99	1545.25	1061.5	13.05	64.175	0.960556
2004-03-19	00:00:00	2	1287.25	-200	8.92138	936.25	126	918	106	1606	1040	11.975	69.7	0.973519
2004-03-19	01:00:00	1.6	1134.25	-200	6.61867	840	103	1021.25	96	1501.25	917	11.95	71.1	0.991471
2004-03-19	02:00:00	0.9	998.75	-200	3.59414	687.75	48	1228.5	63	1380.25	593.5	12.525	69.3	1.00287
2004-03-19	03:00:00	0.7	960.75	-200	2.52944	621.5	-200	1381.5	-200	1300.75	430.25	12.525	67.5	0.976822
2004-03-19	04:00:00	-200	933.75	-200	1.79498	568.5	20	1439.75	32	1280.25	397	12.325	67.65	0.966466
2004-03-19	05:00:00	0.5	912.75	-200	1.2686	524.5	18	1619.75	28	1260.25	370	12.45	66.8	0.962037
2004-03-19	06:00:00	0.7	969.25	-200	2.31432	606.75	56	1372.5	61	1323.75	438	12.35	66.3	0.948706
2004-03-19	07:00:00	1.5	1181.5	-200	6.73104	845	115	1054	99	1539	704.25	12.425	64.9	0.93317
2004-03-19	08:00:00	4.8	1740.25	-200	22.7996	1372.25	320	670.75	157	2144.25	1475.75	13.025	61.625	0.920911
2004-03-19	09:00:00	6.2	1819.25	-200	31.3188	1581.5	357	574.5	166	2455.5	1715.5	13.6	58.825	0.912018
2004-03-19	10:00:00	4	1427	-200	19.238	1275	253	700.5	149	1980.25	1398	13.9	57.15	0.903171
2004-03-19	11:00:00	3.3	1389.5	-200	16.3634	1190.75	218	758.75	135	1878.75	1267.5	14.475	54.4	0.891736
2004-03-19	12:00:00	2.8	1283	-200	14.0193	1117.25	192	813	127	1751	1188.25	15.475	50.075	0.874442
2004-03-19	13:00:00	3	1303.5	-200	15.2599	1156.75	176	793	122	1800.5	1170.5	16.125	47.575	0.865455
2004-03-19	14:00:00	3.3	1364	-200	16.7274	1201.75	198	770.75	135	1875	1250.25	16.275	47.05	0.863995
2004-03-19	15:00:00	3.5	1409.75	-200	19.0004	1268.25	212	724.25	139	1956.5	1344	16.4	47.5	0.879118
2004-03-19	16:00:00	4	1476	-200	19.4148	1280	249	708	147	1954.5	1378	16.05	50.225	0.909371
2004-03-19	17:00:00	4.6	1522	-200	20.8631	1320.25	270	689.75	158	2005.25	1435.25	16	50.65	0.914191
2004-03-19	18:00:00	4.1	1441.75	-200	20.1649	1301	231	704	146	1952.25	1372.25	15.85	50.275	0.898909
2004-03-19	19:00:00	4.5	1469	-200	21.7477	1344.25	251	677.25	144	1996.75	1471	15.475	50.625	0.884047
2004-03-19	20:00:00	3.9	1467.25	-200	19.842	1292	210	697.5	138	1942	1438.75	15.425	51.45	0.895626
2004-03-19	21:00:00	4	1420.5	-200	16.7441	1202.25	249	747.5	143	1854	1428.5	15.2	53.125	0.911745
2004-03-19	22:00:00	2.2	1175	-200	9.1451	945	143	903.75	116	1603.5	1080.5	14.7	57.575	0.957347
2004-03-19	23:00:00	2.1	1215	-200	8.30141	911.5	127	947.75	109	1546.75	993	14.175	58.325	0.938022
2004-03-20	00:00:00	1.7	1126.75	-200	5.79119	802	104	1064	92	1446.5	837	13.775	57.95	0.908544
2004-03-20	01:00:00	1.6	1090.25	-200	5.19165	773	86	1105.25	83	1428.5	761	13.9	55.95	0.884207
2004-03-20	02:00:00	1.3	1017	-200	4.12319	717.5	74	1181.75	81	1382.25	650.25	13.875	55.55	0.876488
2004-03-20	03:00:00	1.3	997.25	-200	3.41063	677	-200	1252.25	-200	1358.5	590.75	13.825	55.1	0.86662
2004-03-20	04:00:00	-200	944.75	-200	2.90855	646.25	44	1308	55	1331.5	505	13.8	54.6	0.857388
2004-03-20	05:00:00	0.8	955.75	-200	3.14921	661.25	42	1259.75	53	1350.5	518	13.625	55.125	0.856019
2004-03-20	06:00:00	0.8	966.25	-200	2.52944	621.5	63	1316.75	67	1342.25	570.75	13.575	58.975	0.912884
2004-03-20	07:00:00	1.1	1064	-200	4.30793	727.5	115	1160.5	91	1461.25	842	13.45	58.35	0.896024
2004-03-20	08:00:00	2.1	1299.75	-200	8.88326	934.75	170	902.25	113	1623	1144.75	13.75	58.025	0.90827
2004-03-20	09:00:00	2.4	1348	-200	10.5435	997.75	147	833.75	102	1689	1218.25	14.6	53.05	0.876531
2004-03-20	10:00:00	2.6	1424.5	-200	12.5211	1067.5	166	776.25	107	1764	1341	15.025	52.325	0.888138
2004-03-20	11:00:00	2.8	1473.75	-200	12.3307	1061	195	767.5	113	1768.25	1405.5	15.4	52.05	0.904643
2004-03-20	12:00:00	2.6	1489.75	-200	11.6884	1038.75	182	782.25	108	1756.75	1421.5	16.25	49.95	0.915813
2004-03-20	13:00:00	2.6	1494.75	-200	11.7241	1040	168	808.75	105	1735	1373	17.15	47.85	0.928079
2004-03-20	14:00:00	2.1	1375.5	-200	9.33874	952.5	125	899.5	93	1636.25	1153.25	19.05	42.95	0.937023
2004-03-20	15:00:00	1.7	1304.75	-200	7.63502	884	95	980	87	1573.25	927.25	19.5	42.25	0.94758
2004-03-20	16:00:00	1.6	1282.5	-200	6.71413	844.25	79	1035.5	76	1538.75	766.25	19.5	42.325	0.949262
2004-03-20	17:00:00	2.1	1392.25	-200	9.72459	967.25	119	929.75	94	1648.75	941.25	19.05	43.8	0.955568
2004-03-20	18:00:00	2.3	1452.25	-200	12.3892	1063	142	855.5	110	1774.25	1146	18.475	46.275	0.974416
2004-03-20	19:00:00	3.5	1633	-200	16.6444	1199.25	215	734	136	1918.5	1416.5	17.375	51.65	1.01592
2004-03-20	20:00:00	3.9	1624.5	-200	16.3716	1191	229	732.75	139	1885	1442	17.1	51.275	0.991415
2004-03-20	21:00:00	3.3	1534.5	-200	13.7353	1108	206	785.25	125	1819.5	1323.25	16.425	53.75	0.996351
2004-03-20	22:00:00	2.3	1322.5	-200	9.88345	973.25	147	863.75	111	1712.25	1125	16.225	55.35	1.01323
2004-03-20	23:00:00	2.1	1309	-200	8.94046	937	122	904.75	97	1671.5	1035.5	15.925	57.65	1.03564
2004-03-21	00:00:00	2.8	1455.5	-200	10.5776	999	175	835	107	1713.75	1202.25	15.725	58.6	1.03955
2004-03-21	01:00:00	2.1	1299.5	-200	7.3517	872	133	940.5	90	1577	1054.25	15.125	60.875	1.03981
2004-03-21	02:00:00	1.6	1202.5	-200	6.24266	823	89	1003.75	84	1525.5	903	15.575	56.625	0.995074
2004-03-21	03:00:00	1.6	1194.75	-200	6.52935	836	-200	987	-200	1554.25	884.5	15.2	57.925	0.994123
2004-03-21	04:00:00	-200	1116.75	-200	5.79119	802	85	1028.5	87	1538.75	817.75	15.375	57.75	1.00213
2004-03-21	05:00:00	1.1	1061.75	-200	3.99592	710.5	55	1135.75	66	1460.75	700	14.9	60.55	1.01965
2004-03-21	06:00:00	0.7	947	-200	2.13037	593.667	24	1300	36	1390	580.333	14.4667	62.9667	1.03162
2004-03-21	07:00:00	0.8	1065	-200	3.58551	687.25	72	1142.5	62	1492.25	814.5	14.15	66.2	1.06298
2004-03-21	08:00:00	1.2	1154.5	-200	4.42986	734	122	1061.75	91	1528	1035	14.475	65.3	1.07041
2004-03-21	09:00:00	1.4	1220.25	-200	5.36448	781.5	111	995.75	89	1559.75	1067.25	15.3	62.125	1.07296
2004-03-21	10:00:00	1.7	1300.75	-200	7.11333	861.75	123	913.5	93	1633	1114	16.325	59	1.08684
2004-03-21	11:00:00	1.8	1279.25	-200	7.29909	869.75	106	911.25	81	1646.25	1000	18.875	49.575	1.06997
2004-03-21	12:00:00	1.8	1267	-200	7.60529	882.75	103	952.75	82	1616.75	905.75	19.375	46.05	1.02492
2004-03-21	13:00:00	1.9	1238.75	-200	6.79318	847.75	102	980.5	80	1567.5	822.25	20.775	41.625	1.00913
2004-03-21	14:00:00	1.3	1128.25	-200	4.58671	742.25	48	1143.75	48	1506.5	610.25	21.375	40.275	1.0126
2004-03-21	15:00:00	1.6	1242.75	-200	8.41892	916.25	63	962	61	1668.5	656.75	21.225	39.3	0.979147
2004-03-21	16:00:00	1.9	1208	-200	6.9125	853	98	1059.75	89	1506.25	646.75	20.275	38.025	0.894214
2004-03-21	17:00:00	2.3	1306.25	-200	8.95319	937.5	132	960.75	105	1606.5	762	19.4	41.3	0.920609
2004-03-21	18:00:00	3.8	1545.5	-200	15.0765	1151	173	769.25	116	1873.75	1122	18.525	43.8	0.925151
2004-03-21	19:00:00	3.5	1501	-200	12.6094	1070.5	185	823	119	1744.25	1130.25	17.775	48.05	0.968889
2004-03-21	20:00:00	4.3	1604.75	-200	15.1402	1153	266	769.25	144	1840	1636.75	17.9	46.85	0.952044
2004-03-21	21:00:00	2.8	1315.5	-200	9.89009	973.5	188	883.25	123	1672.5	1272.25	17.425	49.1	0.968768
2004-03-21	22:00:00	1.9	1195	-200	7.97736	898.25	122	933.25	105	1594.25	1098	16.975	51.675	0.991391
2004-03-21	23:00:00	1.9	1211	-200	7.92893	896.25	112	920.25	93	1624	1066.25	16.4	55.1	1.01978
2004-03-22	00:00:00	1.7	1161.25	-200	6.07437	815.25	93	995.25	86	1582.25	909	16.125	60.025	1.09194
2004-03-22	01:00:00	1.5	1095.25	-200	5.07111	767	74	1050.25	76	1547	818.25	15.825	60.525	1.08048
2004-03-22	02:00:00	0.6	897	-200	1.71865	562.5	23	1416.5	33	1355	472.25	16.325	56.95	1.04908
2004-03-22	03:00:00	0.4	842	-200	0.710518	468	-200	1812.75	-200	1274.25	393.5	16.925	53.9	1.03086
2004-03-22	04:00:00	-200	853.75	-200	0.829014	481.25	17	1755.5	27	1304	396.25	16.1	55.9	1.0153
2004-03-22	05:00:00	0.3	845	-200	0.747676	472.25	15	1785.75	23	1278	378.25	16.525	53.875	1.00494
2004-03-22	06:00:00	0.6	941.5	-200	2.02561	586	41	1479.5	46	1372.5	432	16.375	54	0.997855
2004-03-22	07:00:00	1.2	1090.25	-200	5.09613	768.25	86	1072	76	1537.75	699	15.675	57.65	1.01949
2004-03-22	08:00:00	3.6	1514.25	-200	17.6864	1230.25	226	732	116	1996.25	1252.25	15.8	53.7	0.957133
2004-03-22	09:00:00	3.7	1378.75	-200	18.4249	1251.75	214	711	115	1961.75	1236.75	17.375	42.1	0.828075
2004-03-22	10:00:00	1.8	1074.25	-200	6.94104	854.25	115	1031.75	83	1483.5	772	17.9	38.35	0.779315
2004-03-22	11:00:00	1.6	1089.75	-200	7.25246	867.75	124	1025.75	87	1509	765.75	18.55	36.7	0.776381
2004-03-22	12:00:00	1.9	1109.5	-200	9.64557	964.25	122	947.25	90	1576.5	828.75	21	29.55	0.726251
2004-03-22	13:00:00	2	1101.75	-200	10.4481	994.25	107	954.75	87	1598.75	783	21.35	28.15	0.706679
2004-03-22	14:00:00	2.2	1099.5	-200	11.1726	1020.5	133	951.75	99	1607	822	21.3	26.125	0.65386
2004-03-22	15:00:00	2.1	1093.75	-200	10.6735	1002.5	130	965	99	1573.75	813	21.25	26.775	0.668102
2004-03-22	16:00:00	2.3	1075.5	451	11.5532	1034	150	964.25	101	1544.25	812.5	21.325	24.175	0.605972
2004-03-22	17:00:00	2.6	1151.75	185	12.3526	1061.75	138	928	103	1606.25	849.5	20.225	28.5	0.668178
2004-03-22	18:00:00	3.8	1406.75	426	18.3384	1249.25	213	720	129	1931.75	1275.75	16.975	43.075	0.826399
2004-03-22	19:00:00	4.4	1437.5	672	21.0278	1324.75	232	677.5	143	1992.5	1400.75	15.6	47.425	0.834715
2004-03-22	20:00:00	4.5	1424.5	624	21.0461	1325.25	238	678	146	1965	1355.75	15.275	47.425	0.817783
2004-03-22	21:00:00	3.3	1278.5	325	14.4539	1131.25	180	775.25	124	1758.25	1243	14.525	49.725	0.817693
2004-03-22	22:00:00	2	1131.75	143	8.41892	916.25	128	920	113	1560.5	1082.5	13.925	52	0.823093
2004-03-22	23:00:00	1.1	1006.25	89	4.33127	728.75	65	1141.75	80	1369.5	795	14.475	49.45	0.810595
2004-03-23	00:00:00	0.9	982.25	73	3.79939	699.5	53	1204.25	72	1358.75	735	13.8	51.4	0.807138
2004-03-23	01:00:00	0.8	968.5	48	2.74496	635.75	47	1271	64	1309.25	684	14	51.325	0.8163
2004-03-23	02:00:00	0.7	940.5	47	2.52573	621.25	51	1298.25	70	1329.75	714.25	12.95	56.775	0.844362
2004-03-23	03:00:00	0.5	892	36	1.24379	522.25	-200	1522.25	-200	1284.5	456	11.05	70.05	0.921478
2004-03-23	04:00:00	-200	855	25	0.796958	477.75	20	1700.75	31	1261.25	401.25	10.075	76.825	0.948317
2004-03-23	05:00:00	0.3	833.75	19	0.632453	458.75	13	1908	22	1211.5	361.25	8.825	80.45	0.914701
2004-03-23	06:00:00	0.5	908.5	26	1.76938	566.5	33	1542	47	1286.5	417.75	9.575	75.375	0.900403
2004-03-23	07:00:00	1.1	1061	60	4.62988	744.5	103	1178.25	88	1428.5	616.25	9.8	75	0.909255
2004-03-23	08:00:00	3	1440.75	248	14.2204	1123.75	224	851	130	1829	1088.5	10	74.225	0.911734
2004-03-23	09:00:00	3.8	1498.25	535	21.0186	1324.5	244	684.25	132	2095	1328.75	11.15	69.725	0.923184
2004-03-23	10:00:00	3.4	1342.75	340	16.1827	1185.25	237	760	132	1856.5	1310.5	12	62.925	0.880311
2004-03-23	11:00:00	3	1308	325	15.5407	1165.5	220	791.75	131	1794	1236	12.775	55.825	0.820958
2004-03-23	12:00:00	2.7	1209	267	13.4083	1097.25	207	836.5	129	1746	1147.25	13.125	54.75	0.823433
2004-03-23	13:00:00	3.5	1310.25	325	16.8857	1206.5	208	770.25	132	1846.75	1301	13.75	53.35	0.835092
2004-03-23	14:00:00	2.8	1170.75	268	12.4258	1064.25	160	880.5	110	1639	1096.5	16.025	42.45	0.767392
2004-03-23	15:00:00	1.9	1112	136	10.0635	980	131	923.75	99	1588.5	900.25	14.1	49.8	0.797104
2004-03-23	16:00:00	2	1132	118	8.68745	927	128	944.25	100	1570.25	780.5	11.975	61.125	0.85375
2004-03-23	17:00:00	3	1225	276	13.8348	1111.25	176	817.75	122	1718.75	1013.25	13.6	54.6	0.846514
2004-03-23	18:00:00	1.9	1064.5	151	9.34522	952.75	107	961.75	97	1513.75	789.75	13.65	49.475	0.769509
2004-03-23	19:00:00	2.7	1236.25	236	13.01	1084	131	853.5	112	1687.75	1059	11.675	57.1	0.782209
2004-03-23	20:00:00	3.3	1308.5	220	14.298	1126.25	166	812	128	1721.5	1204.75	11.475	58.175	0.786677
2004-03-23	21:00:00	1.7	1089	87	7.63502	884	89	1006	101	1486.5	974.5	12.6	54.2	0.788146
2004-03-23	22:00:00	1.3	999.667	81	5.25238	776	81	1141.33	96	1374.67	896	11.9667	54.9	0.766391
2004-03-23	23:00:00	1.3	1041.25	74	5.3696	781.75	78	1105.25	86	1424.5	911	11	61.45	0.805725
2004-03-24	00:00:00	1.2	1044.75	55	4.85326	756	70	1136.75	85	1410.5	901.5	11.075	62.225	0.819875
2004-03-24	01:00:00	1.1	997.25	74	4.62027	744	76	1150.5	79	1405	831.75	10.775	62.55	0.808223
2004-03-24	02:00:00	0.9	948.25	35	2.71809	634	43	1319.75	61	1326	715	11.3	60.025	0.802532
2004-03-24	03:00:00	0.6	878.25	29	1.5733	550.75	-200	1492.75	-200	1271.5	683.25	10.575	61.6	0.785638
2004-03-24	04:00:00	-200	907.5	29	1.67167	558.75	44	1477.25	66	1286.75	720.5	10.225	62.675	0.781282
2004-03-24	05:00:00	0.6	892.25	20	1.23831	521.75	34	1572	54	1254.75	647.75	10.875	58.65	0.762782
2004-03-24	06:00:00	0.8	953.75	32	1.69979	561	43	1495.75	57	1255.25	612.25	10.75	57.225	0.738215
2004-03-24	07:00:00	1.2	1045.25	84	4.75073	750.75	79	1185.75	75	1403	799.75	10.375	59.225	0.745549
2004-03-24	08:00:00	3.1	1382.75	245	13.7659	1109	174	831.5	97	1706	1172.5	10.975	57.3	0.75009
2004-03-24	09:00:00	4.4	1597.25	553	23.6793	1395.25	235	652	110	2080.25	1518.5	11.2	56.95	0.756491
2004-03-24	10:00:00	3.4	1317.5	450	14.2126	1123.5	218	761.75	113	1770.25	1286.5	12.1	54.925	0.773369
2004-03-24	11:00:00	1.7	1137.75	118	7.95919	897.5	136	950	88	1505.25	965.5	15.075	44.25	0.753455
2004-03-24	12:00:00	1.5	1097.5	118	6.66352	842	117	1012.25	85	1440	827.75	15.6	40.6	0.71459
2004-03-24	13:00:00	1.7	1117.5	144	8.68745	927	119	958.75	96	1477	824.5	16.875	34.6	0.659675
2004-03-24	14:00:00	2.2	1170.25	159	10.8388	1008.5	126	879	106	1566	872	16.65	35.625	0.669736
2004-03-24	15:00:00	-200	1112.25	122	6.66913	842.25	100	1015.25	91	1494	679.5	11.325	63.875	0.855393
2004-03-24	16:00:00	2.7	1389.5	230	11.3693	1027.5	197	828.75	126	1729.5	1002.25	9.625	81.1	0.971979
2004-03-24	17:00:00	2.8	1353.25	320	13.363	1095.75	195	773.75	130	1783	1159	11.725	69.1	0.949664
2004-03-24	18:00:00	2.7	1260.25	263	12.0041	1049.75	156	828.25	111	1722	978.75	10.675	68.5	0.879356
2004-03-24	19:00:00	4.5	1501.25	556	20.2009	1302	247	680.75	134	2008.25	1311.25	10.675	67.325	0.864272
2004-03-24	20:00:00	3.5	1272.5	458	14.3992	1129.5	190	795.25	136	1743.5	1071.25	10.775	65.675	0.848602
2004-03-24	21:00:00	2.6	1178.5	214	9.39067	954.5	169	927.75	125	1571.25	898.5	10.35	66.325	0.833565
2004-03-24	22:00:00	1.7	1046.75	97	5.94008	809	118	1064.25	108	1435	766	10.05	66.925	0.824761
2004-03-24	23:00:00	1.3	972.5	79	4.5294	739.25	81	1186.25	87	1353.75	589	10.425	61.1	0.771669
2004-03-25	00:00:00	1.3	997	81	4.48663	737	80	1167.75	89	1340.5	630.75	10.325	59.9	0.751587
2004-03-25	01:00:00	1	969.5	52	2.5146	620.5	42	1399.5	58	1249.25	478.5	11.05	58.425	0.768556
2004-03-25	02:00:00	0.7	902	38	1.78216	567.5	38	1450.25	54	1253	478.5	9.1	68.15	0.789041
2004-03-25	03:00:00	0.7	921.25	35	1.42182	538	-200	1564	-200	1224.25	417	9.475	68.175	0.809059
2004-03-25	04:00:00	0.5	858.25	29	0.906697	489.5	18	1706.75	28	1211.75	377.5	9.325	72.3	0.849588
2004-03-25	05:00:00	0.5	878	21	0.616085	456.75	12	1934.5	20	1157.75	343.5	9.9	66.8	0.815171
2004-03-25	06:00:00	0.6	892.5	46	1.44222	539.75	43	1603.75	51	1267.5	412.5	7.55	83.225	0.869495
2004-03-25	07:00:00	1.1	1038	55	3.75531	697	84	1260.25	82	1382.75	604.75	8.075	78.975	0.85442
2004-03-25	08:00:00	2.7	1319.5	271	11.5745	1034.75	184	902.25	112	1720.75	990.75	8.725	74.625	0.842884
2004-03-25	09:00:00	3.5	1352.75	434	17.8314	1234.5	202	740.25	119	1936.75	1175.25	8.6	75.125	0.841547
2004-03-25	10:00:00	2.3	1133.25	300	8.84522	933.25	133	969	99	1552.25	922.75	9.7	69.65	0.838872
2004-03-25	11:00:00	1.6	1065.5	116	6.82718	849.25	130	1039	98	1468	828.5	11	64.425	0.844733
2004-03-25	12:00:00	1.3	1026.5	95	5.93473	808.75	106	1081	88	1441.5	732.75	13.6	52.95	0.820932
2004-03-25	13:00:00	2	1105.5	211	8.88961	935	132	957.5	96	1569.5	819.25	14.175	48.375	0.777999
2004-03-25	14:00:00	1.9	1037.75	168	8.17848	906.5	106	976	81	1492.25	723.25	14.175	46.25	0.743824
2004-03-25	15:00:00	1.9	1084	154	8.61841	924.25	125	986.25	92	1501	786	16.025	41.275	0.74615
2004-03-25	16:00:00	2.2	1104.5	267	10.1238	982.25	138	939.25	105	1545.25	850	17.675	35.4	0.709396
2004-03-25	17:00:00	2	1101.75	143	9.44272	956.5	120	968	88	1526.5	819.5	17.075	37.425	0.722495
2004-03-25	18:00:00	2.9	1239.75	374	14.6418	1137.25	158	835.75	103	1748.25	990.5	14.925	40.525	0.683513
2004-03-25	19:00:00	5.2	1443.25	797	24.5635	1418	253	666.25	141	2059.75	1454.25	13.35	47.8	0.729338
2004-03-25	20:00:00	4.6	1389	698	21.627	1341	231	691.5	133	1981.5	1487.5	12.6	52.55	0.764152
2004-03-25	21:00:00	2.5	1182.75	234	10.3124	989.25	150	904	119	1538.75	1205	12.225	53.225	0.7555
2004-03-25	22:00:00	1.5	1014.25	104	5.70159	797.75	99	1083	106	1376.25	909	10.55	56.075	0.714007
2004-03-25	23:00:00	1.2	978.5	67	4.46767	736	75	1153.75	92	1323.5	768.5	9.925	59.525	0.727584
2004-03-26	00:00:00	1.7	1047.5	88	5.4776	787	93	1098.25	97	1372.75	834.5	9.625	61.1	0.73228
2004-03-26	01:00:00	1.4	1023.75	79	4.79944	753.25	79	1131	91	1357	793	9.7	61.65	0.742519
2004-03-26	02:00:00	1.2	973.5	61	3.63307	690	67	1207.5	83	1313.25	733.25	9.4	62.65	0.739834
2004-03-26	03:00:00	0.6	861.5	43	1.69979	561	-200	1449.25	-200	1219.25	501.75	8.175	68.45	0.745484
2004-03-26	04:00:00	0.7	924.5	40	2.24679	602	45	1398	59	1263	562.25	7.975	69.4	0.745859
2004-03-26	05:00:00	0.8	951.5	52	3.02786	653.75	72	1209.75	73	1312.25	832.25	7.725	72.425	0.765534
2004-03-26	06:00:00	0.9	1004.75	64	4.04572	713.25	103	1130	78	1363	923.5	7.975	71.75	0.771115
2004-03-26	07:00:00	1.6	1122	88	6.65229	841.5	132	1014.75	90	1438	974.25	8.5	66.275	0.737512
2004-03-26	08:00:00	3.4	1350.75	375	16.7025	1201	239	783.25	110	1828	1306.75	9.775	59.6	0.72137
2004-03-26	09:00:00	3.8	1407.75	592	19.344	1278	275	681.75	114	1927.5	1480.75	11.15	56.975	0.754369
2004-03-26	10:00:00	3.1	1303.75	357	14.7756	1141.5	232	771.75	119	1747.25	1404.75	14.85	44.125	0.740708
2004-03-26	11:00:00	2.7	1206.75	296	13.431	1098	180	826	121	1663.5	1194.75	16.85	35.35	0.672923
2004-03-26	12:00:00	2	1099.25	181	10.9773	1013.5	112	947.75	97	1503.25	867.75	19.225	27.1	0.597624
2004-03-26	13:00:00	2.3	1105.67	211	12.5358	1068	116	914.667	99	1535.33	874	19.1	26.2333	0.574085
2004-03-26	14:00:00	1.9	1009.25	199	8.41892	916.25	103	1015	85	1390.5	738	16.35	30.8	0.568256
2004-03-26	15:00:00	1.3	961.75	81	5.25238	776	89	1151.5	75	1279	549.75	14.175	36.825	0.592244
2004-03-26	16:00:00	1.9	1093.25	143	8.82622	932.5	112	975.5	87	1454.25	776.75	13.45	40.975	0.629213
2004-03-26	17:00:00	2.3	1179.75	247	11.2286	1022.5	127	886.25	102	1588.25	966.25	14.225	43.275	0.698194
2004-03-26	18:00:00	2.4	1168	239	11.6385	1037	125	868.25	105	1579.5	989.75	12.075	45.55	0.640331
2004-03-26	19:00:00	2.7	1167.5	267	12.3892	1063	120	875.5	98	1540.25	943.5	10.375	48.025	0.604559
2004-03-26	20:00:00	2.6	1139.5	261	10.5913	999.5	120	916	93	1490	962	10	51.125	0.627988
2004-03-26	21:00:00	1.5	1000.75	97	5.98291	811	99	1097.25	91	1308.25	777.75	9.825	50.825	0.617183
2004-03-26	22:00:00	1.2	953	66	4.60108	743	79	1185.25	85	1252	689.5	9.675	50.425	0.606328
2004-03-26	23:00:00	1.1	971.5	60	4.06844	714.5	66	1236.5	74	1257.5	643.5	9.85	50.175	0.610289
2004-03-27	00:00:00	1.5	1021	77	5.24731	775.75	94	1143.75	87	1306.5	753	9.4	53.35	0.63001
2004-03-27	01:00:00	1	940	57	3.18601	663.5	70	1289.5	79	1232	646	8.625	57.825	0.648825
2004-03-27	02:00:00	1.2	1045.5	65	4.46294	735.75	75	1142.25	78	1312	838.25	8.125	62.15	0.674628
2004-03-27	03:00:00	1.1	1026	59	3.79056	699	-200	1191	-200	1291.5	851.25	7.875	63.475	0.677661
2004-03-27	04:00:00	-200	983.25	48	3.76851	697.75	57	1209	63	1295.75	800.75	7.35	64.825	0.668286
2004-03-27	05:00:00	0.8	915.25	27	1.92201	578.25	32	1417	48	1212	665	8.25	58.875	0.644401
2004-03-27	06:00:00	0.9	934.75	25	2.43729	615.25	54	1373	59	1249.75	717	6.325	66.6	0.641022
2004-03-27	07:00:00	1.1	976.25	42	3.26844	668.5	68	1270.25	65	1266.25	794.5	7.15	62.875	0.639582
2004-03-27	08:00:00	1.5	1123.75	78	6.66352	842	98	1049.75	71	1418	935.5	7.15	63.9	0.650009
2004-03-27	09:00:00	1.8	1162.5	128	8.47483	918.5	128	921.5	84	1530.25	1075.5	11.075	50.5	0.665387
2004-03-27	10:00:00	2.1	1166.5	184	9.69822	966.25	129	941.5	93	1519.75	1016	15.475	36.15	0.631275
2004-03-27	11:00:00	2.1	1120.75	156	9.41017	955.25	130	991.75	99	1450.75	833.75	17.85	29.225	0.592046
2004-03-27	12:00:00	1.9	1071.25	176	9.01058	939.75	111	993.75	93	1449.25	756.25	17.625	30.1	0.601317
2004-03-27	13:00:00	2.1	1064.75	232	10.03	978.75	106	949.5	96	1467.25	766	19.075	26.825	0.586131
2004-03-27	14:00:00	2.5	1157.25	305	12.6389	1071.5	137	888.25	114	1595.5	904.75	17.7	28.575	0.573516
2004-03-27	15:00:00	1.9	1046.25	150	7.59935	882.5	113	1051.25	101	1357	765	17.775	28.45	0.573671
2004-03-27	16:00:00	2.2	1147	188	11.7813	1042	122	933.5	108	1538.25	830.25	18.725	25.975	0.555459
2004-03-27	17:00:00	2.3	1118.75	221	11.2216	1022.25	137	916.25	117	1507.75	853.25	17.075	31.275	0.603768
2004-03-27	18:00:00	2.7	1209.5	219	12.3526	1061.75	165	885.5	125	1586.25	980.5	15.825	36.075	0.644002
2004-03-27	19:00:00	3	1305.75	306	12.8684	1079.25	196	826.75	133	1621	1285.75	14.675	40.1	0.66572
2004-03-27	20:00:00	2.8	1257.5	270	12.2069	1056.75	174	840.5	119	1632.75	1243.5	13.65	44.95	0.69913
2004-03-27	21:00:00	2.2	1148.25	231	8.76934	930.25	140	947.5	107	1475.25	1056.25	12.5	48.075	0.694596
2004-03-27	22:00:00	1.6	1107.75	125	6.78752	847.5	102	1022.75	96	1420.75	1003	11.85	50.825	0.704175
2004-03-27	23:00:00	2.1	1230.75	122	8.60589	923.75	130	906	105	1483.25	1244.5	10.925	56.15	0.732648
2004-03-28	00:00:00	2.3	1292.5	161	8.9341	936.75	121	929.75	102	1463.75	1200.25	10.875	55.95	0.727667
2004-03-28	01:00:00	2.3	1274.25	101	8.31375	912	111	939.25	97	1451	1188	10.3	58.1	0.727812
2004-03-28	02:00:00	1.7	1135.25	95	6.33578	827.25	87	1012.75	79	1394.5	1070	9.3	62.175	0.729409
2004-03-28	03:00:00	2.2	1151	129	8.29525	911.25	-200	935.25	-200	1500.5	1074.5	8.2	66.7	0.72763
2004-03-28	04:00:00	1.3	1009.5	96	5.11617	769.25	77	1109.75	69	1396	895.25	8.3	64.875	0.712431
2004-03-28	05:00:00	0.8	869.75	54	2.59669	626	39	1325	52	1283.75	755.25	9.6	58.5	0.699969
2004-03-28	06:00:00	1.1	983	63	3.60277	688.25	77	1250.75	62	1342	805.5	7.675	66.35	0.69899
2004-03-28	07:00:00	1.4	995.25	72	3.64174	690.5	91	1219	69	1321.25	836.25	7.425	67.975	0.704276
2004-03-28	08:00:00	1.3	1024.25	91	4.68289	747.25	105	1136	75	1382	897.25	9.65	58.6	0.703472
2004-03-28	09:00:00	1.9	1163	127	7.53416	879.75	133	958.5	83	1486.25	1073	12.5	50.125	0.724215
2004-03-28	10:00:00	2.3	1217.75	193	8.96593	938	128	917.75	94	1500.5	1088	16.825	36.925	0.701808
2004-03-28	11:00:00	2.3	1210	188	9.46879	957.5	126	932.5	96	1514.25	1036	19.175	31.325	0.688678
2004-03-28	12:00:00	1.8	1113.5	151	7.69461	886.5	92	1020.25	86	1438	768.25	21.3	26.4	0.660743
2004-03-28	13:00:00	1.4	994.5	103	5.66486	796	66	1159.25	72	1287	587.25	21.225	23.15	0.576775
2004-03-28	14:00:00	1	926.5	55	3.80381	699.75	50	1285	53	1189.25	452	18.625	25.025	0.531854
2004-03-28	15:00:00	1.4	1001.5	104	4.80432	753.5	70	1188.5	65	1259.75	469.75	18.05	27.275	0.559434
2004-03-28	16:00:00	1.3	986.75	116	4.30327	727.25	73	1212.75	70	1244	501.75	18.2	28.25	0.584837
2004-03-28	17:00:00	1.3	993	93	4.05026	713.5	77	1216.5	75	1237.75	515.5	17.05	31.375	0.604755
2004-03-28	18:00:00	1.4	1011.5	93	4.65395	745.75	86	1174.25	86	1300.5	554.5	15.625	35	0.616997
2004-03-28	19:00:00	1.9	1113.75	155	6.2372	822.75	93	1067.5	94	1357.25	670.75	14.1	40.225	0.643846
2004-03-28	20:00:00	1.8	1093.25	115	5.50862	788.5	105	1101.75	103	1329	787.5	13.425	43.2	0.66232
2004-03-28	21:00:00	1.1	968.25	75	3.28088	669.25	67	1261	81	1245.5	538.25	12.325	46.8	0.668597
2004-03-28	22:00:00	1.1	959.75	65	3.21888	665.5	63	1266	80	1223.75	544	11.875	46.475	0.644948
2004-03-28	23:00:00	1.1	942	57	2.93225	647.75	63	1299.75	77	1204	499.5	11.5	46.65	0.631852
2004-03-29	00:00:00	0.9	887.75	40	2.18359	597.5	46	1396.25	58	1155.75	417.25	10.625	47.95	0.613545
2004-03-29	01:00:00	0.6	817.75	27	1.25755	523.5	21	1587.5	31	1071	341.25	10.725	45.775	0.589546
2004-03-29	02:00:00	0.5	840.25	23	1.10196	509	22	1643	38	1075.75	352	10.45	46.65	0.590134
2004-03-29	03:00:00	0.7	894	28	1.26584	524.25	-200	1557	-200	1095	397.25	10.1	47.825	0.591312
2004-03-29	04:00:00	0.6	863.667	21	1.17955	516.333	39	1496.33	59	1153	502.333	11.3333	46.8667	0.627962
2004-03-29	05:00:00	0.7	898	33	1.6779	559.25	55	1441.25	70	1179.75	648.25	10.125	51.2	0.634077
2004-03-29	06:00:00	0.9	945.5	40	2.85357	642.75	76	1309	75	1231.75	759.5	9.85	50.7	0.616675
2004-03-29	07:00:00	2.9	1309.25	279	14.2669	1125.25	181	844.25	103	1686.5	1183	8.1	56.75	0.614991
2004-03-29	08:00:00	4.1	1326.25	743	19.7437	1289.25	259	713.5	134	1805.5	1431.25	10.925	44.05	0.574767
2004-03-29	09:00:00	1.5	966.25	147	5.4518	785.75	118	1111.25	98	1257.75	705.25	11.775	37.6	0.518424
2004-03-29	10:00:00	1.5	975	97	5.59693	792.75	119	1133.25	97	1254	637.25	13.85	33.15	0.52222
2004-03-29	11:00:00	1.5	988.25	118	5.80707	802.75	123	1105	98	1292.5	658.25	15.575	30.075	0.528509
2004-03-29	12:00:00	1.4	971	91	5.45696	786	92	1129.25	78	1271.5	546	16.5	29.025	0.540562
2004-03-29	13:00:00	1.6	1009.75	146	6.45716	832.75	91	1070	83	1332.25	561	17.475	27.875	0.551701
2004-03-29	14:00:00	1.5	983.5	139	5.54491	790.25	103	1131	92	1267.5	531.75	17.9	26.8	0.544606
2004-03-29	15:00:00	1.4	961.5	155	5.24731	775.75	102	1131.25	81	1247	535.25	18.15	26.1	0.538658
2004-03-29	16:00:00	1.5	1012	128	5.77005	801	94	1098.25	90	1288.75	525	17.975	27.05	0.552247
2004-03-29	17:00:00	1.9	1058	166	7.9108	895.5	98	995.75	95	1357.5	603.25	17	28.925	0.555795
2004-03-29	18:00:00	2.5	1173	299	10.2045	985.25	126	904.5	114	1476.75	802.25	16.1	31.275	0.568044
2004-03-29	19:00:00	2.1	1126.5	163	8.19687	907.25	108	956.5	106	1403.5	796.25	14.55	35.45	0.583876
2004-03-29	20:00:00	1.6	1019.5	154	5.69108	797.25	95	1065.75	99	1302	688.75	13.225	37.875	0.573296
2004-03-29	21:00:00	1.2	948.75	80	3.79939	699.5	78	1220.5	90	1177.5	553	13.125	34.375	0.516996
2004-03-29	22:00:00	1.1	929.5	58	3.97788	709.5	61	1278	82	1136.5	509.25	13.55	28.5	0.440453
2004-03-29	23:00:00	1	899.75	55	2.84966	642.5	55	1338.75	74	1089.25	455	12.425	31.875	0.458317
2004-03-30	00:00:00	1	898.75	33	2.64951	629.5	57	1417.5	76	1050.25	425	13.125	26.75	0.402317
2004-03-30	01:00:00	0.7	866.25	33	1.80462	569.25	41	1467.5	66	1055.25	435.5	11.65	33.6	0.45954
2004-03-30	02:00:00	0.7	899.75	32	1.72496	563	46	1402	73	1129.5	618	10.5	42.875	0.544152
2004-03-30	03:00:00	0.8	949	25	1.44222	539.75	-200	1456.75	-200	1104	747.25	11.675	38.675	0.529806
2004-03-30	04:00:00	-200	896.5	29	1.31322	528.5	41	1462	69	1100.5	692.5	12.225	37.175	0.527679
2004-03-30	05:00:00	0.7	956	26	2.28578	604.75	52	1341.25	71	1116.75	691	12.925	33.925	0.503726
2004-03-30	06:00:00	1.1	1054	86	5.3134	779	111	1079.5	98	1265.75	1012.75	11.275	40.275	0.537602
2004-03-30	07:00:00	2.6	1343.25	294	13.3781	1096.25	191	838.5	115	1586.5	1310.75	11.9	38.425	0.534098
2004-03-30	08:00:00	4	1583.5	664	23.8145	1398.75	244	642.25	130	1946.75	1675	13.325	35.55	0.541559
2004-03-30	09:00:00	4.2	1555.75	695	21.4881	1337.25	283	673.5	150	1852.25	1688.5	16.325	28.8	0.530524
2004-03-30	10:00:00	4.7	1564.75	735	20.982	1323.5	320	694.5	159	1872	1687.75	17.9	28.25	0.574072
2004-03-30	11:00:00	3.9	1428.5	649	18.3817	1250.5	249	734.25	146	1754.25	1548.25	18.25	26.625	0.552903
2004-03-30	12:00:00	3.7	1418.5	586	18.9478	1266.75	219	742.25	138	1763	1490.25	20.8	22.5	0.546307
2004-03-30	13:00:00	3.4	1373.25	546	17.1033	1213	200	791	128	1710.5	1353.75	22.45	19.95	0.535185
2004-03-30	14:00:00	2.2	1185.25	245	10.3734	991.5	138	941.75	97	1447.75	1013.5	20.9	21.675	0.529483
2004-03-30	15:00:00	1.9	1122.25	178	7.95313	897.25	118	991	91	1371.75	831.25	19.075	26.5	0.57903
2004-03-30	16:00:00	1.6	1084.5	130	6.16641	819.5	99	1059.75	81	1325	698.75	18.125	30.55	0.629523
2004-03-30	17:00:00	2.1	1248.5	151	9.73119	967.5	112	874	99	1526.5	925.5	17.275	34.725	0.678776
2004-03-30	18:00:00	2.2	1236.25	272	9.59305	962.25	117	853.25	101	1531.5	928	15.85	40.425	0.722792
2004-03-30	19:00:00	2.7	1334	301	11.9249	1047	129	814.75	106	1638	1038	15.925	41.975	0.754053
2004-03-30	20:00:00	2.4	1263.5	237	8.70632	927.75	132	884.25	102	1534	1034.5	15.875	43.5	0.778996
2004-03-30	21:00:00	1.3	1072.75	95	4.65395	745.75	73	1071.5	84	1359.75	788.75	15.025	46.15	0.783326
2004-03-30	22:00:00	1.2	1052.5	68	3.83037	701.25	68	1147	81	1323.25	692.25	15.05	44.55	0.757365
2004-03-30	23:00:00	1.5	1097.75	101	4.67806	747	80	1094	91	1360	763.75	14.85	43.5	0.730216
2004-03-31	00:00:00	1.3	1028.75	81	3.84813	702.25	68	1180	82	1286.5	639.25	14.775	41	0.684988
2004-03-31	01:00:00	1	972.5	50	2.67609	631.25	44	1287.25	64	1239.75	540.75	14.75	40.85	0.681402
2004-03-31	02:00:00	0.9	972	66	2.78741	638.5	47	1222	70	1256.25	677.75	14.825	40.775	0.68339
2004-03-31	03:00:00	0.5	832.25	22	0.972449	496.25	-200	1612.5	-200	1065.75	381	14.2	36.15	0.582314
2004-03-31	04:00:00	0.5	850.5	18	0.790159	477	15	1699	26	1064.25	343	14.525	36.05	0.592817
2004-03-31	05:00:00	0.6	909	31	1.50418	545	44	1472.75	58	1130.5	436	14.575	36.05	0.594701
2004-03-31	06:00:00	1	1037.5	57	3.5211	683.5	85	1219.75	93	1279	687.5	14.425	38.5	0.6291
2004-03-31	07:00:00	3.1	1635.5	342	15.6214	1168	207	720.5	110	1926.25	1437.75	13.775	58.225	0.912855
2004-03-31	08:00:00	4.1	1580.25	644	19.9494	1295	230	639.25	115	1956.5	1488.75	13.225	61.15	0.925599
2004-03-31	09:00:00	2.2	1261.75	216	8.59963	923.5	181	872.25	125	1575.5	1092.75	10.4	74.425	0.938425
2004-03-31	10:00:00	1.7	1196.5	117	6.54049	836.5	144	956.75	118	1498	964.5	11.45	70.975	0.958211
2004-03-31	11:00:00	1.9	1276.75	156	7.68268	886	140	901.5	109	1578.5	1003.75	12.2	70.025	0.992366
2004-03-31	12:00:00	2.9	1429.5	332	11.3059	1025.25	204	779	123	1771.5	1165.75	12.275	73.325	1.04417
2004-03-31	13:00:00	2.2	1242.25	232	9.12583	944.25	149	846	114	1638.25	990.75	11.25	78.125	1.04114
2004-03-31	14:00:00	2.6	1348.5	295	11.2356	1022.75	171	804	114	1748	1053.5	13.625	69.2	1.07459
2004-03-31	15:00:00	3.1	1389.75	386	13.4841	1099.75	195	755	119	1798.75	1191.5	14.875	59.325	0.997441
2004-03-31	16:00:00	2.3	1223.5	278	10.0501	979.5	152	850.25	111	1637	1054.5	15.675	50.875	0.899677
2004-03-31	17:00:00	2.4	1252.5	263	11.3199	1025.75	128	809.5	103	1681	1047.5	15.2	52.95	0.908741
2004-03-31	18:00:00	2.8	1312	322	11.7527	1041	121	820.5	103	1711.5	1072.5	15.5	50.775	0.888065
2004-03-31	19:00:00	2.7	1254.33	226	11.5248	1033	142	818.667	107	1669	1068.33	14.3	52.9333	0.858103
2004-03-31	20:00:00	2.3	1198	221	9.34522	952.75	131	881.5	105	1588.25	1018.5	13.175	55.975	0.844558
2004-03-31	21:00:00	1.5	1060.25	109	5.46727	786.5	81	1044	91	1418	833	12.65	57	0.831531
2004-03-31	22:00:00	1.4	1050	105	5.10113	768.5	60	1078.25	79	1408.75	758.5	12.275	57.75	0.822377
2004-03-31	23:00:00	1.2	1029.25	84	4.80432	753.5	57	1097.5	79	1395.25	749	11.975	58.45	0.816387
2004-04-01	00:00:00	1.6	1143	106	6.29189	825.25	96	985.5	86	1477.25	978.25	11.95	61.625	0.859344
2004-04-01	01:00:00	1.2	1043.75	100	5.12119	769.5	85	1031.25	70	1424.75	944.25	11.5	63.875	0.865156
2004-04-01	02:00:00	1.1	1034	71	4.08665	715.5	50	1085	55	1405	891.25	10.675	67.225	0.862988
2004-04-01	03:00:00	0.9	956.25	72	4.04572	713.25	-200	1098.5	-200	1421.5	848.75	8.975	73.1	0.839403
2004-04-01	04:00:00	0.7	909.25	44	2.43364	615	57	1237	49	1321.5	789.5	10.225	66.575	0.829898
2004-04-01	05:00:00	0.9	996	45	2.94016	648.25	64	1175.5	50	1339.75	852	10.95	63.7	0.832514
2004-04-01	06:00:00	1.7	1153.5	134	7.44563	876	153	1001.5	67	1560.5	987.25	9.625	68.775	0.824264
2004-04-01	07:00:00	4.2	1510.25	505	19.7883	1290.5	342	675.25	94	1949	1434.5	9.5	69.6	0.827329
2004-04-01	08:00:00	6.2	1721.5	1042	31.9186	1595.25	378	538.75	119	2438.5	1797.75	11.875	60.925	0.845475
2004-04-01	09:00:00	4.6	1511.5	737	20.9728	1323.25	304	631	139	2001	1676.5	16.225	48.575	0.889207
2004-04-01	10:00:00	2.8	1258.25	375	11.717	1039.75	192	799.5	113	1700.75	1281.75	19.15	39.6	0.869266
2004-04-01	11:00:00	1.6	1093.75	124	6.83286	849.5	130	970.25	88	1488.75	871.25	19.725	38.45	0.874324
2004-04-01	12:00:00	1.7	1128.75	137	7.42798	875.25	106	974	73	1523.75	759.25	20.6	36.675	0.879714
2004-04-01	13:00:00	1.7	1124.5	179	8.59963	923.5	102	936.5	73	1541.5	789.5	21.85	33.9	0.87714
2004-04-01	14:00:00	1.7	-200	222	-200	-200	99	-200	72	-200	-200	-200	-200	-200
2004-04-01	15:00:00	1.9	-200	197	-200	-200	108	-200	81	-200	-200	-200	-200	-200
2004-04-01	16:00:00	2.3	-200	319	-200	-200	131	-200	93	-200	-200	-200	-200	-200
2004-04-01	17:00:00	3.3	1308	388	16.4266	1192.67	163	793.333	106	1193	1187.33	23.6	27.5333	0.79126
2004-04-01	18:00:00	4.2	1528.5	589	21.2482	1330.75	211	700.25	132	2028.25	1398.75	22.85	32.075	0.881361
2004-04-01	19:00:00	5.5	1592.25	840	25.0058	1429.25	267	623.75	164	2089	1644	20.75	36.675	0.887778
2004-04-01	20:00:00	4.9	1535.75	655	20.2099	1302.25	269	666	161	1921.75	1598.75	18.25	40.9	0.849342
2004-04-01	21:00:00	2.5	1192.25	254	10.7974	1007	154	827	124	1604	1223.25	16.775	44.025	0.834144
2004-04-01	22:00:00	2	1186	188	9.9433	975.5	127	844	113	1570.25	1200	15.825	48	0.856884
2004-04-01	23:00:00	2	1202.75	120	8.51842	920.25	122	897.75	103	1528.5	1117.75	14.9	52	0.875669
2004-04-02	00:00:00	2	1139	157	7.98343	898.5	126	921.25	104	1514.25	1066.5	14.075	54.45	0.870147
2004-04-02	01:00:00	1.3	1072.25	88	5.63347	794.5	84	985.5	93	1441.75	1048	13.25	58.85	0.892212
2004-04-02	02:00:00	1	954.25	68	3.24362	667	58	1179.5	60	1350.25	717.5	13.25	60.875	0.922912
2004-04-02	03:00:00	0.9	951.25	57	3.33503	672.5	-200	1137	-200	1380.75	796.5	11.775	64.325	0.886904
2004-04-02	04:00:00	-200	925.5	36	2.77194	637.5	37	1195	52	1342.25	748.5	11.225	65.95	0.877466
2004-04-02	05:00:00	0.7	968	51	2.63059	628.25	56	1196.5	66	1371.5	736.75	11.275	72.95	0.973757
2004-04-02	06:00:00	1.1	1066.5	93	4.29861	727	91	1054.75	82	1447.5	903.25	11.425	71.75	0.967106
2004-04-02	07:00:00	2.6	1385.75	284	12.9876	1083.25	159	797.5	109	1832.5	1159	11.925	73.65	1.02537
2004-04-02	08:00:00	3.9	1473.5	486	20.3453	1306	190	633.5	114	2059.75	1365.25	12.625	70.175	1.02209
2004-04-02	09:00:00	5	1569	798	20.7172	1316.25	249	634	139	2054	1509.5	13.625	65.275	1.01363
2004-04-02	10:00:00	3.3	1374.5	524	15.8969	1176.5	196	705.75	127	1897.75	1385.75	16.95	52.275	1.00134
2004-04-02	11:00:00	2.9	1327.5	468	14.1893	1122.75	180	738.25	127	1821	1368	19.45	44.075	0.985484
2004-04-02	12:00:00	3.1	1340.75	454	15.8887	1176.25	167	747.75	135	1824.5	1346.5	22.9	33.825	0.932237
2004-04-02	13:00:00	3	1296.5	461	16.0926	1182.5	159	764.5	130	1773	1241.5	23.625	31.275	0.900129
2004-04-02	14:00:00	2.7	1303	391	14.6811	1138.5	152	790.25	126	1760.75	1138	24.725	30.5	0.937099
2004-04-02	15:00:00	2.7	1281	337	13.9731	1115.75	149	808.75	121	1702.5	1079.5	26.125	27.275	0.910052
2004-04-02	16:00:00	2.6	1247.75	297	13.5676	1102.5	143	871.5	122	1632.25	1002	27.575	22.825	0.82881
2004-04-02	17:00:00	3.7	1382	588	19.6991	1288	185	777.75	138	1799	1212.25	26.875	22.35	0.779163
2004-04-02	18:00:00	4.5	1491.25	721	23.2951	1385.25	223	685	165	1915.25	1486.25	24.275	30.125	0.901216
2004-04-02	19:00:00	4.7	1619.75	710	24.144	1407.25	215	641	154	2051.75	1567.25	21.225	40.05	0.997833
2004-04-02	20:00:00	5.5	1693	787	25.3919	1439	271	617.75	168	2083.25	1722.5	19.425	42.475	0.948254
2004-04-02	21:00:00	3	1373.5	415	14.1429	1121.25	180	770.75	146	1685.25	1399.25	18.5	43.025	0.90738
2004-04-02	22:00:00	1.9	1287.25	245	10.1238	982.25	115	841.25	124	1582	1290.5	17.775	46.95	0.946709
2004-04-02	23:00:00	2.3	1408.25	294	12.0764	1052.25	149	761	124	1683.5	1442.5	16.8	53.225	1.01003
2004-04-03	00:00:00	1.6	1254.25	139	9.02975	940.5	98	828	106	1566.25	1269.5	17.075	51.75	0.999041
2004-04-03	01:00:00	1.3	1140.75	98	6.31931	826.5	73	935.5	88	1488.25	1109.75	16.25	54.175	0.993276
2004-04-03	02:00:00	1.2	1140.75	88	5.27777	777.25	69	986	83	1455.25	1059.75	15.05	58.15	0.98857
2004-04-03	03:00:00	0.9	1041.75	66	3.75971	697.25	-200	1055.75	-200	1410	964.75	15.05	57.625	0.979645
2004-04-03	04:00:00	0.8	986.25	57	2.98786	651.25	60	1144.5	74	1380.25	891	14.45	57.975	0.948831
2004-04-03	05:00:00	0.8	1005	57	3.34758	673.25	56	1103	64	1387.25	904.5	13.725	61.625	0.963083
2004-04-03	06:00:00	0.9	1040.75	60	3.50828	682.75	73	1112.25	69	1397.5	898.75	13.875	59.625	0.940784
2004-04-03	07:00:00	2	1271.75	200	9.50142	958.75	159	845.5	91	1659.75	1136.25	13.325	61.7	0.939921
2004-04-03	08:00:00	3	1436.25	451	15.172	1154	203	704	96	1872.25	1390.75	15.05	55.8	0.948619
2004-04-03	09:00:00	3.1	1471.75	422	14.2747	1125.5	211	719.5	106	1816	1460	16.975	50.475	0.968369
2004-04-03	10:00:00	-200	1418.25	-200	11.2426	1023	-200	785.25	-200	1720.25	1410	19.7	43.325	0.983671
2004-04-03	11:00:00	-200	1410	-200	11.4399	1030	-200	781	-200	1743.33	1372	20.7333	41.7333	1.0092
2004-04-03	12:00:00	-200	1437.5	-200	13.3781	1096.25	-200	781	-200	1779.25	1266.25	23.275	35.825	1.00976
2004-04-03	13:00:00	-200	1278.25	-200	10.5913	999.5	-200	866.25	-200	1621.25	1013.75	23.85	30.5	0.88967
2004-04-03	14:00:00	-200	1256.5	-200	10.7767	1006.25	-200	914.75	-200	1573	869.5	24.8	26.975	0.832481
2004-04-03	15:00:00	-200	1331	-200	11.8961	1046	-200	882.25	-200	1634.75	904.5	24.975	27.5	0.857509
2004-04-03	16:00:00	-200	1361.25	-200	13.5372	1101.5	-200	834	-200	1703.5	991.25	25.8	26.5	0.867486
2004-04-03	17:00:00	-200	1397.75	-200	15.2279	1155.75	-200	812.25	-200	1721.75	1075.5	25.05	27.125	0.849571
2004-04-03	18:00:00	-200	1483.25	-200	17.0949	1212.75	-200	764	-200	1797.75	1249	23.725	28.575	0.827337
2004-04-03	19:00:00	-200	1696.5	-200	26.6563	1470.5	-200	625	-200	2153	1547.75	22.125	36.8	0.968093
2004-04-03	20:00:00	-200	1459	-200	14.2359	1124.25	-200	736.25	-200	1823	1299.5	19.9	47.475	1.09117
2004-04-03	21:00:00	-200	1268	-200	8.46239	918	-200	873	-200	1601.75	1028.75	18.725	50.375	1.07724
2004-04-03	22:00:00	-200	1469.25	-200	14.3369	1127.5	-200	761.75	-200	1869.75	1207	18.15	51.3	1.05874
2004-04-03	23:00:00	-200	1315.5	-200	9.32577	952	-200	847	-200	1644	1046.75	17.475	53.8	1.06481
2004-04-04	00:00:00	-200	1224.25	-200	7.8144	891.5	-200	884	-200	1579.75	923.25	16.675	56.475	1.06337
2004-04-04	01:00:00	-200	1215.25	-200	6.68599	843	-200	928.5	-200	1550.75	861.5	15.925	59.2	1.06349
2004-04-04	02:00:00	-200	1114.5	-200	5.36448	781.5	-200	979.75	-200	1500.25	752	15.225	62.4	1.07262
2004-04-04	03:00:00	-200	1123.5	-200	5.59172	792.5	-200	965	-200	1520.75	790.5	14.65	64.95	1.07656
2004-04-04	04:00:00	-200	1027.5	-200	3.49974	682.25	-200	1089.5	-200	1448	697.25	14.3	65.35	1.05939
2004-04-04	05:00:00	-200	1009.5	-200	2.96795	650	-200	1171.25	-200	1433.75	664	13.725	66.5	1.03927
2004-04-04	06:00:00	-200	1073.5	-200	4.3781	731.25	-200	1019.75	-200	1487.75	890.75	12.925	69.125	1.02638
2004-04-04	07:00:00	-200	1034	-200	3.52538	683.75	-200	1110.25	-200	1423.25	812.5	13.725	64.85	1.01348
2004-04-04	08:00:00	-200	1129.5	-200	4.16905	720	-200	1063.25	-200	1460.75	828.25	15.3	58.95	1.01812
2004-04-04	09:00:00	-200	1275	-200	8.01377	899.75	-200	867.75	-200	1633.75	1057	18.125	49.85	1.02723
2004-04-04	10:00:00	-200	1324.25	-200	8.97868	938.5	-200	846.25	-200	1657.5	1010.75	21.475	40.725	1.03013
2004-04-04	11:00:00	-200	1267.5	-200	8.06852	902	-200	906	-200	1588.75	931.75	23.275	37.1	1.0457
2004-04-04	12:00:00	-200	1272.25	-200	8.59963	923.5	-200	895	-200	1603.25	880.75	25.075	33.775	1.05942
2004-04-04	13:00:00	-200	1160	-200	7.07297	860	-200	968.75	-200	1530.75	646	25.6	32.125	1.03933
2004-04-04	14:00:00	-200	1135.5	-200	5.5761	791.75	-200	1057.25	-200	1476	535.75	25.75	31.075	1.01427
2004-04-04	15:00:00	-200	1296	-200	9.96996	976.5	-200	863	-200	1642.25	745.5	26.1	30.775	1.02533
2004-04-04	16:00:00	-200	1345.25	-200	10.4821	995.5	-200	840.75	-200	1677.75	833.25	24.4	36	1.08499
2004-04-04	17:00:00	-200	1295.75	-200	10.1305	982.5	-200	844.5	-200	1626	802	23.05	36.15	1.00531
2004-04-04	18:00:00	-200	1257.5	-200	9.97662	976.75	-200	838.25	-200	1635.75	837.75	22.1	39.35	1.03362
2004-04-04	19:00:00	-200	1420.25	-200	13.0474	1085.25	-200	754.75	-200	1755.5	1050.5	19.85	44.55	1.02081
2004-04-04	20:00:00	-200	1365.75	-200	10.5162	996.75	-200	829.5	-200	1672.5	1041.25	18.525	48.875	1.03235
2004-04-04	21:00:00	-200	1113.25	-200	5.17148	772	-200	989	-200	1492.5	646.25	16.55	56.1	1.04808
2004-04-04	22:00:00	-200	1195.75	-200	6.9068	852.75	-200	909	-200	1556	768.75	15.775	58.8	1.04639
2004-04-04	23:00:00	-200	1188	-200	6.36328	828.5	-200	929.5	-200	1539.75	785.25	15.3	60.8	1.05007
2004-04-05	00:00:00	-200	1101.5	-200	4.74101	750.25	-200	1007	-200	1470.25	613	14.7	64.45	1.07166
2004-04-05	01:00:00	-200	969	-200	2.36824	610.5	-200	1238.75	-200	1330	429.75	14.8	63.25	1.05839
2004-04-05	02:00:00	-200	982.5	-200	2.21158	599.5	-200	1233.25	-200	1374.75	484.5	15	61.475	1.0418
2004-04-05	03:00:00	-200	876	-200	1.05546	504.5	-200	1456	-200	1294.25	467.25	15.5	56.95	0.996067
2004-04-05	04:00:00	-200	884	-200	0.899513	488.75	-200	1536.25	-200	1277.75	436.25	16	53.975	0.974204
2004-04-05	05:00:00	-200	1023.5	-200	3.09233	657.75	-200	1175	-200	1417	681.75	13.45	63.875	0.980866
2004-04-05	06:00:00	-200	1126.25	-200	6.20993	821.5	-200	945	-200	1541.25	927.25	12.925	65.25	0.968847
2004-04-05	07:00:00	-200	1414.75	-200	13.1597	1089	-200	767	-200	1795	1191.75	13.425	62.5	0.958218
2004-04-05	08:00:00	-200	1630.5	-200	25.7904	1449	-200	569.75	-200	2298.5	1614.5	14.475	58.75	0.963042
2004-04-05	09:00:00	-200	1498.5	-200	18.2434	1246.5	-200	646.5	-200	1971.75	1504.5	15.275	56.675	0.977288
2004-04-05	10:00:00	3.1	1460.75	424	14.3058	1126.5	236	702.5	124	1836.25	1450.75	15.55	57.425	1.00754
2004-04-05	11:00:00	3	1429.75	339	13.7047	1107	228	713.25	121	1852.75	1409.25	16.65	55.225	1.03821
2004-04-05	12:00:00	3.2	1498.25	445	15.7022	1170.5	206	683.5	114	1941.5	1433.75	17	54.3	1.04338
2004-04-05	13:00:00	3.1	1453.5	535	15.4201	1161.75	188	681.5	114	1915.25	1457	18.025	51.525	1.05519
2004-04-05	14:00:00	2.5	1402.25	278	12.5579	1068.75	158	732.5	106	1792.5	1324.75	19.5	47.5	1.06533
2004-04-05	15:00:00	2.1	1327	256	9.81712	970.75	124	803.25	89	1704.75	1120	21.575	41.675	1.06055
2004-04-05	16:00:00	2	1273	245	9.61273	963	98	832	82	1662	931	22.175	38.3	1.01059
2004-04-05	17:00:00	3.2	1456.75	458	16.3305	1189.75	160	677.75	111	1876.5	1212	20.275	42.75	1.00533
2004-04-05	18:00:00	4.1	1542.75	710	19.7616	1289.75	194	631	132	2011	1353.25	19.725	45.35	1.03122
2004-04-05	19:00:00	3.9	1499.25	678	17.994	1239.25	174	650.75	121	1956.5	1358.75	18.8	47.475	1.01993
2004-04-05	20:00:00	3.1	1378.25	436	13.56	1102.25	157	742.25	116	1795.75	1272.75	17.925	49.45	1.00644
2004-04-05	21:00:00	2	1242.5	178	8.70632	927.75	109	851.75	100	1622	1078.75	17.5	50.9	1.00898
2004-04-05	22:00:00	1.7	1195.5	160	7.66479	885.25	85	883.75	89	1588.75	972.5	17.425	51.85	1.02303
2004-04-05	23:00:00	1.6	1137.25	177	7.28742	869.25	90	889.75	92	1553.75	951.25	17.025	53.85	1.03635
2004-04-06	00:00:00	1	1015.25	101	4.12319	717.5	61	1065.25	71	1427.75	714.25	16.625	55.45	1.04081
2004-04-06	01:00:00	0.8	977.5	66	2.72959	634.75	36	1187.5	51	1381.75	579	15.9	57	1.02236
2004-04-06	02:00:00	0.5	933.333	40	1.53207	547.333	25	1357.33	39	1336	542.333	15.0333	59.2333	1.00593
2004-04-06	03:00:00	0.5	926.5	54	1.93524	579.25	-200	1267.25	-200	1370	561.5	14.45	61.35	1.00407
2004-04-06	04:00:00	0.5	907.75	39	1.79819	568.75	24	1303	35	1360.25	525.75	14.125	61.65	0.988348
2004-04-06	05:00:00	0.8	979.5	62	3.40219	676.5	73	1141	64	1434.5	659	14.6	58.775	0.971124
2004-04-06	06:00:00	1.7	1236.25	120	8.49972	919.5	164	879.75	94	1641	1011.75	14.375	58.9	0.959389
2004-04-06	07:00:00	4.5	1664	599	24.1343	1407	329	594.25	134	2198	1563.75	15.3	55.225	0.953788
2004-04-06	08:00:00	6.2	1757.25	1084	33.7132	1635.75	302	493.75	129	2560	1806	16.175	52.475	0.957592
2004-04-06	09:00:00	4.4	1524	776	21.9714	1350.25	256	588	125	2096	1603.75	18.45	46.3	0.973438
2004-04-06	10:00:00	2.9	1329.25	470	14.0579	1118.5	182	707	107	1823.25	1288.25	19.575	41.75	0.940681
2004-04-06	11:00:00	1.6	1166.5	169	7.62312	883.5	105	881	78	1580	931.25	20.15	40.15	0.937012
2004-04-06	12:00:00	2.6	1368.75	304	14.4695	1131.75	136	715	91	1818.25	1161.5	20.875	36.65	0.893937
2004-04-06	13:00:00	2.9	1283.5	405	13.5828	1103	167	755.25	116	1704	1064.25	20.4	34.725	0.822857
2004-04-06	14:00:00	2.5	1221.25	297	11.4965	1032	166	811.25	131	1629.5	912.5	19.25	35.375	0.781308
2004-04-06	15:00:00	1.9	1096	220	9.20301	947.25	115	871.5	113	1518.75	683.5	18.575	36.95	0.782876
2004-04-06	16:00:00	1.9	1143	226	10.2786	988	109	849.25	98	1589.75	710	18.775	36.75	0.788301
2004-04-06	17:00:00	2.7	1251.25	456	13.9654	1115.5	143	759.5	116	1716.25	922.5	17.55	40.575	0.806811
2004-04-06	18:00:00	3	1267.5	470	14.9653	1147.5	159	727.75	120	1775.75	1005.5	16.85	44.275	0.842819
2004-04-06	19:00:00	3.3	1314	503	15.0526	1150.25	181	725.75	126	1783.5	1083	16.25	47.7	0.87456
2004-04-06	20:00:00	3.2	1314.75	459	14.7993	1142.25	178	724	126	1807.25	1160.75	15.65	50.675	0.89473
2004-04-06	21:00:00	1.8	1094.5	227	8.46861	918.25	91	895.75	90	1527.25	799.5	15.725	49.425	0.87679
2004-04-06	22:00:00	1.3	1026.5	152	5.90804	807.5	76	996.25	81	1457.75	647	15.775	48.625	0.865316
2004-04-06	23:00:00	1.1	1011.75	94	4.76532	751.5	66	1053.25	74	1392.5	649	15.7	47	0.83246
2004-04-07	00:00:00	0.9	947.75	93	3.9869	710	56	1127.25	67	1352	575	15.7	45.85	0.812091
2004-04-07	01:00:00	0.7	888.5	49	2.26448	603.25	35	1307.5	46	1271	455.25	15.625	44.925	0.791959
2004-04-07	02:00:00	0.4	830	30	1.42182	538	21	1475.25	30	1213.5	391.75	15.625	44.4	0.782704
2004-04-07	03:00:00	0.3	800.5	30	0.672057	463.5	-200	1749	-200	1154	340	16.125	42.425	0.77177
2004-04-07	04:00:00	0.3	804.25	30	0.712681	468.25	12	1826.25	19	1166.25	319.5	15.725	45.45	0.806274
2004-04-07	05:00:00	0.3	823.5	32	0.796958	477.75	22	1704.75	32	1200	331	15.25	50.05	0.861687
2004-04-07	06:00:00	0.8	999.75	59	3.59414	687.75	55	1257	61	1398	425.75	14.2	58.625	0.944347
2004-04-07	07:00:00	2.8	1306.5	277	12.9354	1081.5	152	776.75	111	1768.75	830.25	14.3	58.175	0.943075
2004-04-07	08:00:00	3.1	1286.25	454	15.7184	1171	153	715.5	102	1821	1005.5	15	52.025	0.881651
2004-04-07	09:00:00	2.3	1149.75	211	8.62468	924.5	152	865.25	116	1576.25	819.75	13.6	61.4	0.95194
2004-04-07	10:00:00	1.6	1086.5	196	7.43975	875.75	112	910.5	96	1553.75	737	16.15	53.1	0.967479
2004-04-07	11:00:00	1.5	1016	110	6.59629	839	119	991.25	97	1447.5	789.5	16.575	44.325	0.829392
2004-04-07	12:00:00	1.6	1028.5	164	7.83244	892.25	122	937.25	110	1473.5	759.5	17.375	40.275	0.792178
2004-04-07	13:00:00	1.8	1108.75	151	9.10017	943.25	115	883	103	1604	767	18.075	42.25	0.867927
2004-04-07	14:00:00	1.4	996.5	112	6.1122	817	84	1030.25	79	1426	626.25	14.375	51.775	0.843334
2004-04-07	15:00:00	1.9	1177	117	7.52824	879.5	146	926.75	104	1551.75	775.5	10.9	76.4	0.995251
2004-04-07	16:00:00	1.2	1044.75	120	5.91871	808	65	1037.75	69	1420.75	588.75	16.4	47.65	0.881894
2004-04-07	17:00:00	2.3	1171	251	12.6832	1073	120	846.5	96	1623	872	18.025	37.1	0.759776
2004-04-07	18:00:00	3.3	1220.5	435	13.5068	1100.5	185	799.25	121	1700	996.25	14.7	48.65	0.808944
2004-04-07	19:00:00	3.1	1261.75	345	14.5008	1132.75	157	774.25	129	1747.5	1033	11.275	71.275	0.951399
2004-04-07	20:00:00	3.3	1206.5	343	10.9565	1012.75	174	875.75	116	1632	981.75	10	73.975	0.908663
2004-04-07	21:00:00	1.2	955.75	62	3.22299	665.75	62	1234.75	71	1282	517.75	9.8	71.775	0.870157
2004-04-07	22:00:00	1.3	1020.25	70	4.29396	726.75	81	1152.75	85	1390.75	630.5	9.25	75.225	0.879605
2004-04-07	23:00:00	1.9	1107.25	114	7.08449	860.5	118	956.75	101	1509.75	878.75	9.6	75.95	0.908763
2004-04-08	00:00:00	1.4	1019.5	88	4.76532	751.5	95	1073.5	97	1397.75	838.75	9.3	75	0.879866
2004-04-08	01:00:00	1.5	1051.25	95	5.69633	797.5	84	1015.5	89	1455	876.25	9	76.725	0.882483
2004-04-08	02:00:00	1.1	965	83	4.09121	715.75	56	1086.75	72	1383.25	826.5	8.175	79.625	0.86719
2004-04-08	03:00:00	0.8	890	63	3.3225	671.75	-200	1183	-200	1337.5	781.25	7.575	80.625	0.843736
2004-04-08	04:00:00	-200	822.5	38	1.78536	567.75	43	1366	57	1262.75	698.75	8.3	75.6	0.830208
2004-04-08	05:00:00	0.8	869	68	2.83794	641.75	69	1290.75	62	1287.5	723.25	8.075	72.075	0.77977
2004-04-08	06:00:00	1.1	938.75	59	4.8092	753.75	74	1168.75	64	1383.75	797.25	8.05	70.45	0.760925
2004-04-08	07:00:00	2.6	1274.25	226	13.7659	1109	161	820.25	80	1723	1137.75	8.075	70.5	0.76273
2004-04-08	08:00:00	5.1	1511.5	802	27.104	1481.5	308	596.25	118	2189	1605.25	9.925	64.3	0.785949
2004-04-08	09:00:00	4.2	1435.25	585	19.0795	1270.5	300	675.5	130	1885.25	1568.75	13	54.225	0.809028
2004-04-08	10:00:00	2.6	1207.25	324	11.7456	1040.75	189	813.25	113	1619.5	1319	16.475	42.55	0.791212
2004-04-08	11:00:00	2.4	1222.5	308	12.7275	1074.5	164	818.25	112	1677.75	1197.5	19.3	34.15	0.756572
2004-04-08	12:00:00	2.1	1120.5	238	11.3199	1025.75	122	864.75	96	1541	958.25	21.5	27.4	0.694123
2004-04-08	13:00:00	2.6	1176.25	301	14.1893	1122.75	166	816	125	1609	1067.75	20.375	26.725	0.632321
2004-04-08	14:00:00	2.8	1144	294	13.9039	1113.5	181	844.75	128	1550.75	1009.5	20.65	22.575	0.543151
2004-04-08	15:00:00	2.5	1136	353	13.1597	1089	127	855.5	101	1551.5	928	20.55	24.8	0.593064
2004-04-08	16:00:00	1.9	1084.75	209	10.7216	1004.25	106	887.5	95	1453.75	815.5	21.025	25.45	0.626435
2004-04-08	17:00:00	3.6	1297.33	538	19.6635	1287	192	722.667	138	1798	1216.33	21.4667	24.5333	0.62025
2004-04-08	18:00:00	4.6	1407.75	808	23.9984	1403.5	241	646.25	154	1972.25	1462.5	19.325	28.65	0.635698
2004-04-08	19:00:00	6.3	1617.75	974	29.1158	1530	326	579	171	2166.5	1791	18	32.95	0.673743
2004-04-08	20:00:00	4.3	1318.5	544	15.7508	1172	232	745.75	136	1699	1425	15.825	39.75	0.709607
2004-04-08	21:00:00	1.6	1045	138	7.00974	857.25	92	967.5	93	1410.25	922.25	15.35	41.525	0.719443
2004-04-08	22:00:00	1.4	1058	92	6.27181	824.333	95	993	99	1411	971.333	14.1	46	0.736281
2004-04-08	23:00:00	2	-200	137	-200	-200	129	-200	106	-200	-200	-200	-200	-200
2004-04-09	00:00:00	2.4	-200	189	-200	-200	154	-200	109	-200	-200	-200	-200	-200
2004-04-09	01:00:00	1.8	-200	159	-200	-200	118	-200	97	-200	-200	-200	-200	-200
2004-04-09	02:00:00	1	-200	80	-200	-200	69	-200	83	-200	-200	-200	-200	-200
2004-04-09	03:00:00	1	-200	66	-200	-200	-200	-200	-200	-200	-200	-200	-200	-200
2004-04-09	04:00:00	1	-200	87	-200	-200	97	-200	79	-200	-200	-200	-200	-200
2004-04-09	05:00:00	0.9	-200	79	-200	-200	145	-200	84	-200	-200	-200	-200	-200
2004-04-09	06:00:00	1.5	-200	150	-200	-200	169	-200	86	-200	-200	-200	-200	-200
2004-04-09	07:00:00	2.6	-200	196	-200	-200	250	-200	111	-200	-200	-200	-200	-200
2004-04-09	08:00:00	2.9	-200	299	-200	-200	215	-200	117	-200	-200	-200	-200	-200
2004-04-09	09:00:00	2.7	-200	254	-200	-200	237	-200	122	-200	-200	-200	-200	-200
2004-04-09	10:00:00	2.4	-200	226	-200	-200	190	-200	119	-200	-200	-200	-200	-200
2004-04-09	11:00:00	2.6	-200	262	-200	-200	219	-200	121	-200	-200	-200	-200	-200
2004-04-09	12:00:00	4.1	-200	505	-200	-200	294	-200	127	-200	-200	-200	-200	-200
2004-04-09	13:00:00	4.3	-200	512	-200	-200	253	-200	135	-200	-200	-200	-200	-200
2004-04-09	14:00:00	2.2	-200	159	-200	-200	176	-200	119	-200	-200	-200	-200	-200
2004-04-09	15:00:00	3.4	-200	337	-200	-200	243	-200	137	-200	-200	-200	-200	-200
2004-04-09	16:00:00	3.6	-200	357	-200	-200	214	-200	139	-200	-200	-200	-200	-200
2004-04-09	17:00:00	2.5	-200	194	-200	-200	141	-200	117	-200	-200	-200	-200	-200
2004-04-09	18:00:00	2.8	-200	278	-200	-200	166	-200	127	-200	-200	-200	-200	-200
2004-04-09	19:00:00	3.4	-200	303	-200	-200	197	-200	137	-200	-200	-200	-200	-200
2004-04-09	20:00:00	3	-200	234	-200	-200	191	-200	127	-200	-200	-200	-200	-200
2004-04-09	21:00:00	2.1	-200	128	-200	-200	159	-200	107	-200	-200	-200	-200	-200
2004-04-09	22:00:00	2.4	-200	160	-200	-200	175	-200	102	-200	-200	-200	-200	-200
2004-04-09	23:00:00	2.3	1176	169	8.43754	917	157	866	95	1559.5	1151.25	12.05	67.85	0.952281
2004-04-10	00:00:00	1.3	1046.5	77	5.39523	783	83	1013.75	79	1449	975	11.95	66.95	0.9336
2004-04-10	01:00:00	1.7	1115.75	98	6.92391	853.5	118	929	78	1532.75	1033.75	11.525	70.05	0.950332
2004-04-10	02:00:00	1.7	1074.25	102	6.44055	832	101	951.25	75	1506.5	979.75	11.4	69.775	0.938961
2004-04-10	03:00:00	1	922	65	3.58551	687.25	-200	1142	-200	1390.25	824.75	11.075	69.275	0.912766
2004-04-10	04:00:00	0.8	898.25	69	3.28088	669.25	46	1163	52	1386.25	806.5	10.8	70.25	0.909196
2004-04-10	05:00:00	1	970.25	89	3.95089	708	81	1120.5	55	1435.25	841.5	10.2	73.35	0.912858
2004-04-10	06:00:00	1.4	1072.5	134	6.00437	812	112	987.75	65	1500.25	950	10.825	70.525	0.914243
2004-04-10	07:00:00	1.7	1081.25	157	8.16623	906	150	894.5	72	1591	1023.5	10.95	71	0.92792
2004-04-10	08:00:00	2	1158.5	167	9.94996	975.75	138	837.25	76	1662.75	1097.5	12.425	64.025	0.920589
2004-04-10	09:00:00	2	1112	157	8.77565	930.5	124	868.75	84	1587.75	1011.25	14.975	53.15	0.899293
2004-04-10	10:00:00	1.9	1111.75	172	8.43754	917	124	897.25	90	1542	931.25	16.575	44.425	0.831264
2004-04-10	11:00:00	2.1	1062.5	114	7.4633	876.75	115	970.5	89	1480.75	811	18	38.45	0.786204
2004-04-10	12:00:00	1.8	1032	166	7.82642	892	101	972.75	87	1457	755.5	20.625	30.025	0.721299
2004-04-10	13:00:00	1.5	936	94	6.36879	828.75	90	1053.5	88	1335.75	606.5	19.9	26.7	0.613674
2004-04-10	14:00:00	1.3	882.5	108	5.05613	766.25	90	1152	81	1238.25	497.75	19.8	23.125	0.528264
2004-04-10	15:00:00	1.4	941.5	98	6.88401	851.75	89	1055	89	1318.25	539.5	21.4	22.725	0.572219
2004-04-10	16:00:00	1.5	942.75	132	6.83853	849.75	92	1083.5	91	1295.5	544.25	22.15	21.275	0.560522
2004-04-10	17:00:00	1.7	1007	144	7.41035	874.5	103	1027.25	104	1357	619.75	21.05	24.5	0.603967
2004-04-10	18:00:00	2	1037.25	165	8.67488	926.5	122	949	111	1425.5	739.5	18.25	31.6	0.656216
2004-04-10	19:00:00	2.5	1126.5	210	11.2076	1021.75	159	871.25	129	1533.5	921.25	16.125	35.025	0.637153
2004-04-10	20:00:00	2.4	1123	277	10.5025	996.25	172	861	133	1550.75	1033.25	14.775	41.475	0.692924
2004-04-10	21:00:00	2	1110	168	8.22756	908.5	125	916	115	1487	984.25	13.15	50.3	0.757719
2004-04-10	22:00:00	2.9	1247.25	248	11.6385	1037	187	811.5	125	1618	1192.75	12.3	55.5	0.791611
2004-04-10	23:00:00	2.5	1219.75	235	9.7114	966.75	174	843.5	117	1545	1218.5	11.825	56.625	0.783266
2004-04-11	00:00:00	1.4	1028.25	84	5.12621	769.75	75	1046.5	84	1326	912.75	11.2	56.225	0.746861
2004-04-11	01:00:00	1.2	977.75	75	3.99592	710.5	48	1143.75	63	1304	750.25	11	56.575	0.741804
2004-04-11	02:00:00	1	949	62	3.70271	694	61	1159.75	68	1309.5	771.75	9.275	64.3	0.753098
2004-04-11	03:00:00	1	909.5	66	3.95988	708.5	-200	1161.5	-200	1329.25	712.25	8.825	65.975	0.750123
2004-04-11	04:00:00	-200	863	49	2.97989	650.75	38	1224	52	1285.5	712	7.775	70.375	0.746345
2004-04-11	05:00:00	0.7	836.25	38	2.85748	643	38	1244.25	49	1306	727	7.7	70.725	0.746322
2004-04-11	06:00:00	0.8	856.25	44	2.87315	644	41	1259	49	1301	746.25	7.4	71.025	0.73465
2004-04-11	07:00:00	0.9	887.5	60	2.98786	651.25	51	1240.25	52	1298.25	733.25	8.225	66.65	0.728292
2004-04-11	08:00:00	1.1	912	88	3.70271	694	61	1196.33	58	1342.67	727	8.73333	64.3	0.726664
2004-04-11	09:00:00	1	937.5	70	3.91949	706.25	47	1176.75	51	1319.5	641.5	12.95	47.85	0.711628
2004-04-11	10:00:00	1.6	1052.5	94	6.24812	823.25	87	1040	77	1385.5	810.25	17.425	35.425	0.698953
2004-04-11	11:00:00	1.8	1086.75	126	7.31077	870.25	107	1013.5	90	1411.5	850.5	20.2	29.175	0.682961
2004-04-11	12:00:00	2.6	1153	181	9.15153	945.25	161	968.75	118	1424.5	911.25	22.65	22.925	0.622425
2004-04-11	13:00:00	1.1	893.75	66	3.98239	709.75	61	1209	70	1200.25	611.25	22.3	22.4	0.595514
2004-04-11	14:00:00	0.6	796.5	54	2.30003	605.75	26	1452.25	35	1075.75	367.5	22.15	18.95	0.499267
2004-04-11	15:00:00	0.9	854	48	3.09637	658	42	1408.5	46	1107.75	368.5	22.05	18.975	0.496923
2004-04-11	16:00:00	1	891.75	66	3.21476	665.25	55	1347.5	58	1150	393.75	21	23.55	0.578789
2004-04-11	17:00:00	1.2	935.25	65	3.3225	671.75	65	1298.75	61	1182.75	414.5	19.575	27.35	0.61623
2004-04-11	18:00:00	1.4	989.25	68	3.97338	709.25	75	1224.75	80	1232.75	469	17.925	30.75	0.625844
2004-04-11	19:00:00	2	1062.75	118	5.67534	796.5	93	1078.75	93	1284.5	607.25	16.375	35.35	0.653225
2004-04-11	20:00:00	1.1	922	65	3.35596	673.75	63	1219.75	78	1205	498	15.55	37.475	0.657514
2004-04-11	21:00:00	1.1	925.25	63	3.45294	679.5	60	1222.5	76	1217.25	481	15.525	36.75	0.643778
2004-04-11	22:00:00	1.1	924.25	61	2.94016	648.25	63	1271.5	74	1186.25	464.5	14.55	39.025	0.642758
2004-04-11	23:00:00	1.1	913.5	63	3.14513	661	66	1256.25	81	1186.75	478	14.225	38.2	0.616315
2004-04-12	00:00:00	0.7	839.75	31	1.63757	556	41	1473.75	58	1094	366.25	13.65	38.3	0.595699
2004-04-12	01:00:00	0.6	799.25	29	1.14931	513.5	42	1614.75	59	1036.25	332.25	14.1	34	0.544208
2004-04-12	02:00:00	0.7	855.5	34	1.95185	580.5	36	1447.5	54	1110.5	346.25	14.575	33.975	0.56047
2004-04-12	03:00:00	0.6	829.5	34	1.68102	559.5	-200	1451.75	-200	1066	349.5	14.425	32.825	0.536369
2004-04-12	04:00:00	0.3	752.5	9	0.657346	461.75	16	1821.5	25	955	274	13.875	30.85	0.486762
2004-04-12	05:00:00	0.3	784.5	14	0.542781	447.5	16	1923.25	26	1003	263	13.525	37.925	0.585175
2004-04-12	06:00:00	0.4	834.75	23	0.743263	471.75	33	1755.5	49	1116.75	314.25	13.875	43.55	0.687147
2004-04-12	07:00:00	0.5	865	36	0.945425	493.5	39	1613	53	1184.75	367	13.475	50.1	0.770567
2004-04-12	08:00:00	0.6	922.25	39	1.45687	541	45	1452.75	57	1246.25	431.75	13.325	53.625	0.816909
2004-04-12	09:00:00	0.8	974.5	38	2.19058	598	63	1267.5	73	1292.75	536	13.4	56.025	0.857575
2004-04-12	10:00:00	1	1040.25	55	2.90067	645.75	71	1209.5	78	1325.25	554.5	12.95	59.575	0.886003
2004-04-12	11:00:00	1.3	1114.5	75	3.92845	706.75	104	1105	93	1384.25	677.25	12.7	62.675	0.917263
2004-04-12	12:00:00	1.1	1004.25	64	2.81846	640.5	85	1201.25	71	1304.75	557.25	12.075	60.5	0.850494
2004-04-12	13:00:00	0.6	894.75	39	1.40154	536.25	53	1414.5	56	1228.5	420.75	11.175	64.375	0.853733
2004-04-12	14:00:00	0.7	917	42	1.7218	562.75	58	1414.5	60	1257	422.75	10.725	67.575	0.870313
2004-04-12	15:00:00	1.2	1025	78	3.61142	688.75	89	1188.5	77	1324.75	519	11.4	61.2	0.823568
2004-04-12	16:00:00	1.4	1035.25	69	3.12478	659.75	96	1221.75	82	1301.25	532.5	9.85	70.55	0.858115
2004-04-12	17:00:00	1.2	1024.5	67	3.49121	681.75	88	1196.5	77	1313	537	10.275	65.175	0.815106
2004-04-12	18:00:00	1.3	1040.25	83	3.89713	705	100	1149.25	91	1323.5	611.5	10.975	58.925	0.771362
2004-04-12	19:00:00	1.8	1069.75	79	5.24731	775.75	127	1065	93	1368.75	697	10.6	59.45	0.759455
2004-04-12	20:00:00	1.2	963.75	68	3.66346	691.75	88	1176	82	1292.25	572.75	10.575	57.725	0.736217
2004-04-12	21:00:00	0.8	904.25	56	2.73343	635	66	1269.25	74	1233.25	488.75	10.575	56.05	0.714854
2004-04-12	22:00:00	0.8	913.25	49	2.60045	626.25	61	1270.75	68	1234.25	473.75	10.25	57.975	0.723876
2004-04-12	23:00:00	0.8	914	56	2.36102	610	54	1321.75	65	1229.5	454.75	10.375	58.4	0.735164
2004-04-13	00:00:00	0.7	893	48	2.03915	587	46	1367.5	58	1219.25	432.5	10.65	58.2	0.745915
2004-04-13	01:00:00	0.5	844.25	27	1.34712	531.5	25	1498.5	36	1176	376	10.55	59.875	0.762393
2004-04-13	02:00:00	0.3	836.5	29	1.1975	518	18	1580.75	29	1182.25	360	10.475	60.8	0.770391
2004-04-13	03:00:00	0.4	868.25	32	1.33012	530	-200	1481.5	-200	1215	383.75	10.625	63.05	0.806758
2004-04-13	04:00:00	0.3	824.75	47	0.899513	488.75	21	1565.25	28	1170.75	363	11.075	60.15	0.792535
2004-04-13	05:00:00	0.7	955.5	66	3.06002	655.75	76	1250.75	68	1356.25	524.75	10.075	68.4	0.84432
2004-04-13	06:00:00	1.6	1124.25	163	6.9068	852.75	149	960.25	99	1531	872.5	10.025	68.725	0.845558
2004-04-13	07:00:00	3.9	1496.25	524	19.1235	1271.75	328	667.25	130	2011.25	1398.75	10.975	64.15	0.83976
2004-04-13	08:00:00	4.5	1451.75	657	22.0929	1353.5	282	620.25	128	2056.5	1501	12.025	58.075	0.813773
2004-04-13	09:00:00	2.7	1172	324	11.7813	1042	206	796.5	120	1641	1186.25	12.775	51.975	0.76434
2004-04-13	10:00:00	1.6	1019.5	144	7.31661	870.5	133	955.5	93	1425.5	911.25	12.6	50.8	0.738705
2004-04-13	11:00:00	1.6	1044	135	8.0077	899.5	137	934	96	1470.75	919.25	13.8	47.35	0.743541
2004-04-13	12:00:00	1.6	1019.75	140	7.20596	865.75	116	971.75	84	1428.5	791.25	15.125	42.7	0.729364
2004-04-13	13:00:00	1.5	1009.25	141	7.65883	885	112	993.75	87	1438.5	750.75	16.275	38.15	0.700562
2004-04-13	14:00:00	1.8	1073	181	9.69163	966	128	934.5	87	1536.5	804.75	16.575	36.7	0.686716
2004-04-13	15:00:00	2.1	1098	227	9.81712	970.75	145	877	103	1527.25	965.75	15.85	40.5	0.724133
2004-04-13	16:00:00	1.7	1060.75	149	7.69461	886.5	110	919.75	88	1462.25	869.25	16.35	41.8	0.771205
2004-04-13	17:00:00	3	1288.75	425	15.2838	1157.5	184	755.25	118	1790.75	1195.75	16.1	42.85	0.778279
2004-04-13	18:00:00	4.6	1441.5	669	21.4696	1336.75	243	629.5	134	2004	1523	15.275	46.825	0.807437
2004-04-13	19:00:00	5	1479	680	21.692	1342.75	259	630.75	144	1994.75	1578.5	14.7	47	0.781508
2004-04-13	20:00:00	3.5	1266	446	14.6497	1137.5	205	726	129	1746.75	1370	14.1	49.55	0.793103
2004-04-13	21:00:00	2.1	1149	205	9.3193	951.75	144	844.5	108	1577.25	1203.5	13.525	54.125	0.835138
2004-04-13	22:00:00	2.1	1167.5	194	9.36469	953.5	152	842.75	104	1585.5	1201.25	12.325	59.225	0.846104
2004-04-13	23:00:00	1.5	1078.5	115	6.78187	847.25	108	925.25	90	1463	1121.75	11.65	62.225	0.851037
2004-04-14	00:00:00	1.1	1047.33	74	4.93201	760	64	1032	74	1378.67	1003	11.4667	61.4333	0.830289
2004-04-14	01:00:00	0.9	935.5	85	3.8882	704.5	73	1085.75	73	1363.75	918.25	10.875	64.55	0.839515
2004-04-14	02:00:00	0.7	900	66	2.72576	634.5	47	1206.75	60	1307	835.75	11.075	63.225	0.833051
2004-04-14	03:00:00	0.4	839.25	60	1.89565	576.25	-200	1325.25	-200	1285	759	10.7	64.425	0.828392
2004-04-14	04:00:00	-200	839.5	40	1.71865	562.5	45	1349.25	57	1275	755.25	10.65	63.775	0.817366
2004-04-14	05:00:00	0.9	904.5	47	3.28919	669.75	79	1190.75	62	1345.5	819.75	10.225	65.75	0.819613
2004-04-14	06:00:00	1.6	1078.5	116	7.42798	875.25	113	947	71	1534.75	998	10.325	65.55	0.82248
2004-04-14	07:00:00	3.9	1416.75	478	18.2348	1246.25	263	669	94	1921	1403	10.85	63.975	0.830684
2004-04-14	08:00:00	5	1529.25	836	27.73	1496.75	275	568.5	99	2277.5	1641	13.3	55.575	0.845261
2004-04-14	09:00:00	4.3	1397.25	655	18.2952	1248	263	659.25	119	1906.25	1534	15.775	46.8	0.832839
2004-04-14	10:00:00	2.7	1214.25	312	12.338	1061.25	183	779.75	103	1661.75	1256.5	19.525	34.45	0.773827
2004-04-14	11:00:00	2.1	1109.25	195	8.88961	935	147	882.25	95	1518	1026.25	21.075	30.175	0.744994
2004-04-14	12:00:00	2.1	1122	238	10.4209	993.25	132	858.75	95	1571	993	18.425	34.225	0.718456
2004-04-14	13:00:00	-200	1093.75	-200	9.67846	965.5	-200	877.25	-200	1518.75	919.25	21.025	30.625	0.753814
2004-04-14	14:00:00	-200	1164	-200	12.772	1076	-200	787.75	-200	1653.25	1031.75	21.425	28.675	0.723134
2004-04-14	15:00:00	-200	1188.25	-200	12.9429	1081.75	-200	790.25	-200	1652.75	1076.5	21.325	27.35	0.685557
2004-04-14	16:00:00	-200	1098.25	-200	8.85789	933.75	-200	895.25	-200	1496.5	883	20.375	30.4	0.719273
2004-04-14	17:00:00	-200	1180.25	-200	10.9982	1014.25	-200	826	-200	1594.75	1036	18.7	34.825	0.743564
2004-04-14	18:00:00	-200	1195	-200	12.6463	1071.75	-200	799	-200	1608.5	1143.5	18.6	34.725	0.73687
2004-04-14	19:00:00	-200	1234	-200	13.3328	1094.75	-200	788.5	-200	1638.25	1211.5	17.925	35.75	0.727607
2004-04-14	20:00:00	-200	1425	-200	18.0799	1241.75	-200	675.25	-200	1858.25	1485.75	16.55	42.05	0.785594
2004-04-14	21:00:00	-200	1319.5	-200	13.0249	1084.5	-200	730	-200	1689	1440.25	14.8	49.725	0.832074
2004-04-14	22:00:00	-200	1157.75	-200	7.82041	891.75	-200	870.25	-200	1494	1242	13.375	54.25	0.829078
2004-04-14	23:00:00	-200	1060.25	-200	5.84949	804.75	-200	963.75	-200	1418	1088.75	13.45	54.175	0.831912
2004-04-15	00:00:00	-200	1036	-200	4.66359	746.25	-200	1033.75	-200	1364	993.25	12.3	57.65	0.822277
2004-04-15	01:00:00	-200	942.75	-200	3.12071	659.5	-200	1162.5	-200	1296.5	862	11.575	58.75	0.799617
2004-04-15	02:00:00	-200	899.25	-200	2.0971	591.25	-200	1242.75	-200	1259	815.25	10.65	62.325	0.798782
2004-04-15	03:00:00	-200	889.25	-200	1.6779	559.25	-200	1330.75	-200	1240.75	713.75	10.2	63.2	0.786539
2004-04-15	04:00:00	-200	846.75	-200	1.29083	526.5	-200	1416.25	-200	1216	682	10.475	61.25	0.776093
2004-04-15	05:00:00	-200	917.75	-200	2.57793	624.75	-200	1255	-200	1297.5	743.75	9.3	65.825	0.772229
2004-04-15	06:00:00	-200	1105	-200	7.93498	896.5	-200	905.75	-200	1510.25	1049.75	9.125	67.375	0.781354
2004-04-15	07:00:00	-200	1490.5	-200	21.3957	1334.75	-200	624.75	-200	2001.25	1522	10.2	62.925	0.783117
2004-04-15	08:00:00	-200	1507.75	-200	22.1397	1354.75	-200	608.75	-200	2033.5	1623	11.6	58.675	0.79989
2004-04-15	09:00:00	3.9	1489.25	536	19.0619	1270	309	633.25	114	1888.5	1637.75	13.45	53.375	0.819627
2004-04-15	10:00:00	3.8	1451.25	481	17.3136	1219.25	327	661.25	127	1803.75	1633.25	15.025	49.275	0.836369
2004-04-15	11:00:00	3.8	1454.25	460	17.5081	1225	299	660.5	135	1808.75	1654.25	17.05	42.125	0.811962
2004-04-15	12:00:00	3.9	1392.25	597	16.986	1209.5	257	689.25	135	1791.75	1559	18.45	36.9	0.775807
2004-04-15	13:00:00	3.5	1350.5	465	16.986	1209.5	195	708.75	120	1782.5	1374	19.25	35.425	0.782413
2004-04-15	14:00:00	4	1417.5	542	19.4769	1281.75	231	680.75	129	1890	1418	19.15	35.65	0.782559
2004-04-15	15:00:00	3	1303	437	14.8071	1142.5	170	748.25	114	1734.25	1228.25	21.475	30.35	0.767694
2004-04-15	16:00:00	3.1	1292.25	383	13.9654	1115.5	192	746.25	129	1676	1292.75	19.575	34.65	0.780709
2004-04-15	17:00:00	5.2	1560	778	24.3777	1413.25	251	593.5	149	2046	1642.25	19.6	35.525	0.801651
2004-04-15	18:00:00	5.9	1765	926	28.1437	1506.75	289	533	149	2270.75	1895	18.275	44.15	0.918251
2004-04-15	19:00:00	7.3	1874.5	1189	33.7468	1636.5	351	482	158	2445.75	2086	17.375	47.75	0.939206
2004-04-15	20:00:00	6.1	1746.25	824	24.1926	1408.5	319	552.5	148	2119.25	1897.75	16.8	49.775	0.944563
2004-04-15	21:00:00	4.6	1606.5	660	19.7526	1289.5	264	587.25	134	1960	1758	16.2	53.2	0.972346
2004-04-15	22:00:00	2.5	1277	203	9.31282	951.5	144	802.25	111	1606.75	1284	14.875	59.05	0.992817
2004-04-15	23:00:00	2.2	1206.5	136	7.25246	867.75	119	877.25	106	1532.25	1075.25	13.925	64	1.01304
2004-04-16	00:00:00	2	1208.5	114	7.13644	862.75	120	881.75	108	1547.25	1084.25	13.675	66.825	1.04102
2004-04-16	01:00:00	1.9	1188.5	110	6.71413	844.25	96	886.75	93	1565.5	1048.75	13.45	69.6	1.06878
2004-04-16	02:00:00	1.6	1131.75	127	5.95612	809.75	77	899	83	1532	1021.25	12.85	71.95	1.0632
2004-04-16	03:00:00	1	974.25	68	2.72959	634.75	-200	1159	-200	1387	778	12.9	68.5	1.01547
2004-04-16	04:00:00	1	1032.75	70	3.56829	686.25	63	1029.5	69	1419.75	947.5	11.875	74.8	1.03802
2004-04-16	05:00:00	1.2	1074.5	93	5.36448	781.5	97	941	77	1504.75	988	11.6	76.4	1.04153
2004-04-16	06:00:00	2	1241.75	179	10.0033	977.75	180	777.5	87	1685.5	1184.25	11.7	75.25	1.03251
2004-04-16	07:00:00	4.5	1656.75	523	23.2377	1383.75	352	579	109	2175.75	1600.25	12.75	71.025	1.04281
2004-04-16	08:00:00	4.1	1405.75	546	18.6507	1258.25	279	636	116	1890.25	1494.75	13.8	61.1	0.959458
2004-04-16	09:00:00	2.6	1149.75	251	9.86353	972.5	186	827.25	105	1590	1187.75	15.3	51.45	0.888591
2004-04-16	10:00:00	2.3	1184.25	222	10.1506	983.25	169	822.5	106	1604.25	1165.5	16.625	48.725	0.914579
2004-04-16	11:00:00	2.6	1223	212	10.9843	1013.75	172	780.75	108	1666	1218.5	17.625	46.675	0.93244
2004-04-16	12:00:00	2.4	1195.5	263	10.5094	996.5	127	802	100	1643.5	1128	19.25	42.675	0.942539
2004-04-16	13:00:00	4.3	1559.25	535	18.939	1266.5	230	652.75	149	2046.5	1373.25	15.725	62.525	1.10918
2004-04-16	14:00:00	4.6	1543.75	609	18.9303	1266.25	280	612.5	148	2065.75	1415.25	14.5	75.675	1.24245
2004-04-16	15:00:00	4	1485.33	449	17.4516	1223.33	242	650.333	126	1980	1302	14.4333	77.4	1.2654
2004-04-16	16:00:00	4.7	1498	536	17.6609	1229.5	250	649.25	140	1962.5	1308	14.625	74.875	1.2391
2004-04-16	17:00:00	5.7	1593.25	743	22.9991	1377.5	309	581.75	142	2158.75	1448.5	14.625	75.975	1.25731
2004-04-16	18:00:00	5.2	1528.5	575	20.4448	1308.75	270	626.75	141	2083.25	1384.75	14.05	76.25	1.21659
2004-04-16	19:00:00	6.4	1689	783	26.8086	1474.25	323	560	149	2298.25	1491.75	13.875	77.975	1.23032
2004-04-16	20:00:00	6	1535.25	706	19.9494	1295	307	627.25	140	2038.75	1379.5	13.775	78	1.22289
2004-04-16	21:00:00	3.4	1303.75	299	12.5138	1067.25	224	736.75	117	1811	1166.75	13.5	79.35	1.2224
2004-04-16	22:00:00	2.7	1234.5	159	9.60617	962.75	166	803	103	1679.5	1094.75	13.075	80.15	1.20159
2004-04-16	23:00:00	3.1	1281.25	171	9.96996	976.5	171	794.25	99	1695.25	1104.5	12.775	81.025	1.19155
2004-04-17	00:00:00	2.6	1167	162	8.11731	904	169	845.5	100	1627.25	1051	12.725	80.625	1.18186
2004-04-17	01:00:00	2.2	1133.75	111	7.13644	862.75	120	868.5	88	1598.75	1009	12.525	81.8	1.18376
2004-04-17	02:00:00	1.9	1099.75	134	6.3743	829	103	886.75	83	1564.75	971.75	12.65	81.225	1.18493
2004-04-17	03:00:00	-200	1056.75	-200	5.09112	768	-200	958.25	-200	1527.25	883.75	12.425	82.4	1.1848
2004-04-17	04:00:00	-200	901.5	-200	2.99584	651.75	-200	1157.75	-200	1437.25	661.25	12.6	79.9	1.16186
2004-04-17	05:00:00	-200	981.75	-200	4.23825	723.75	-200	1055	-200	1507.5	773.75	12.775	79.975	1.17611
2004-04-17	06:00:00	-200	996.75	-200	5.10113	768.5	-200	1001.75	-200	1523.5	868.25	12.575	79.875	1.15963
2004-04-17	07:00:00	-200	1141	-200	8.07461	902.25	-200	904.75	-200	1672.25	965.25	12.55	79.6	1.15378
2004-04-17	08:00:00	-200	1163.25	-200	8.75672	929.75	-200	848.5	-200	1691.25	985.25	12.75	80.8	1.18633
2004-04-17	09:00:00	-200	1106.5	-200	7.15379	863.5	-200	911.25	-200	1604.25	963.25	13.45	78.125	1.19969
2004-04-17	10:00:00	-200	1227.75	-200	9.24816	949	-200	837.5	-200	1705.75	1068.75	14.575	74.85	1.23477
2004-04-17	11:00:00	-200	1033	-200	5.95612	809.75	-200	968.75	-200	1526.25	863.5	16.825	61.025	1.15986
2004-04-17	12:00:00	-200	983.5	-200	4.9815	762.5	-200	1053.75	-200	1472	641.25	18.8	50.125	1.07686
2004-04-17	13:00:00	-200	1066.25	-200	7.52233	879.25	-200	938.75	-200	1535.75	739.5	19.325	47.075	1.04452
2004-04-17	14:00:00	-200	926	-200	3.93742	707.25	-200	1130.25	-200	1428.75	531.5	19.25	46.625	1.02978
2004-04-17	15:00:00	-200	978.5	-200	5.01129	764	-200	1054.25	-200	1461.5	572	19.7	44.4	1.00808
2004-04-17	16:00:00	-200	992.5	-200	5.3901	782.75	-200	1032.75	-200	1482	629.5	19.35	45.725	1.01612
2004-04-17	17:00:00	-200	969.75	-200	4.99639	763.25	-200	1042.75	-200	1462	607.5	17.9	49.875	1.01352
2004-04-17	18:00:00	-200	997	-200	5.49827	788	-200	1014	-200	1481.5	644.25	16.925	53.225	1.01795
2004-04-17	19:00:00	-200	1096.75	-200	7.82041	891.75	-200	908.5	-200	1594.25	833	16.075	55.975	1.01507
2004-04-17	20:00:00	-200	1105.25	-200	8.20301	907.5	-200	899.75	-200	1566.25	923.25	16.55	52.775	0.985962
2004-04-17	21:00:00	-200	992.75	-200	5.27269	777	-200	1022	-200	1481.5	790	16.875	51.1	0.97426
2004-04-17	22:00:00	-200	1135.75	-200	7.91684	895.75	-200	918.75	-200	1622.75	960.5	16.975	50.825	0.975083
2004-04-17	23:00:00	-200	1296.75	-200	10.6873	1003	-200	797.5	-200	1700.25	1176.75	16.9	54.75	1.04548
2004-04-18	00:00:00	-200	1110.25	-200	6.94676	854.5	-200	897	-200	1568.25	943.25	16.25	57.225	1.0492
2004-04-18	01:00:00	-200	1026.5	-200	6.31931	826.5	-200	941.5	-200	1528.5	742	16.025	56.225	1.01641
2004-04-18	02:00:00	-200	1024.25	-200	5.63869	794.75	-200	982.25	-200	1501.25	704.75	15.625	60.225	1.06168
2004-04-18	03:00:00	-200	991.75	-200	5.3901	782.75	-200	988	-200	1526.75	662.5	14.625	68.175	1.12822
2004-04-18	04:00:00	-200	928.5	-200	3.19011	663.75	-200	1143.75	-200	1448.75	536.25	14.275	69.55	1.12569
2004-04-18	05:00:00	-200	891.75	-200	1.93524	579.25	-200	1308.5	-200	1396	441.25	13.825	71.925	1.13125
2004-04-18	06:00:00	-200	895.25	-200	2.33942	608.5	-200	1267.75	-200	1410.25	477	13.775	72.725	1.14019
2004-04-18	07:00:00	-200	915.25	-200	2.39358	612.25	-200	1266	-200	1411	506	14.175	72.325	1.16318
2004-04-18	08:00:00	-200	947.25	-200	2.94809	648.75	-200	1154.25	-200	1458.75	608	14.475	72.9	1.19499
2004-04-18	09:00:00	-200	1031.5	-200	4.19206	721.25	-200	1052	-200	1545.5	663	14.225	75.625	1.22013
2004-04-18	10:00:00	-200	1218.5	-200	6.81017	848.5	-200	900.75	-200	1664	912.25	14.525	77.2	1.2695
2004-04-18	11:00:00	-200	1216.5	-200	7.26993	868.5	-200	872.75	-200	1660.25	963.25	14.875	74.525	1.253
2004-04-18	12:00:00	-200	1096.5	-200	5.30321	778.5	-200	980.25	-200	1565.25	802.5	15.5	67.35	1.17796
2004-04-18	13:00:00	-200	937.75	-200	3.36015	674	-200	1136.25	-200	1432.75	563.75	16.675	56	1.05442
2004-04-18	14:00:00	-200	943.5	-200	3.40219	676.5	-200	1139.5	-200	1435.75	500.5	17.075	55.55	1.0724
2004-04-18	15:00:00	-200	1138.5	-200	6.77621	847	-200	928.5	-200	1603.75	700.5	16.225	62.4	1.14229
2004-04-18	16:00:00	-200	1163.25	-200	7.0442	858.75	-200	920.75	-200	1603.25	782.5	17.35	58.9	1.15672
2004-04-18	17:00:00	-200	1157.25	-200	7.66479	885.25	-200	916.25	-200	1590.25	783.75	17.45	54.65	1.07995
2004-04-18	18:00:00	-200	1154.25	-200	8.4935	919.25	-200	876	-200	1622.75	860.75	17.475	54.175	1.07223
2004-04-18	19:00:00	-200	1341.5	-200	13.5372	1101.5	-200	744	-200	1824	1156.25	17.05	55.1	1.06206
2004-04-18	20:00:00	-200	1178	-200	9.2417	948.75	-200	846.75	-200	1652.75	1046.75	16.35	57.825	1.06686
2004-04-18	21:00:00	-200	1151.5	-200	8.65604	925.75	-200	853.5	-200	1668.75	1033.75	15.775	60.375	1.07442
2004-04-18	22:00:00	-200	1078	-200	6.62987	840.5	-200	920.25	-200	1594.75	962	15.5	63.3	1.10713
2004-04-18	23:00:00	-200	1167	-200	9.1451	945	-200	826	-200	1702.25	1099.75	15	65.175	1.1045
2004-04-19	00:00:00	-200	1110.5	-200	7.77239	889.75	-200	870.5	-200	1658.25	1047.25	14.5	67.325	1.10536
2004-04-19	01:00:00	-200	988.25	-200	4.21051	722.25	-200	1029	-200	1499.5	873.75	14.1	70.125	1.12243
2004-04-19	02:00:00	-200	917.25	-200	3.40219	676.5	-200	1102.5	-200	1493.75	747.25	13.8	73.35	1.15182
2004-04-19	03:00:00	-200	850	-200	1.70921	561.75	-200	1275	-200	1406.75	589	13.05	78.275	1.1716
2004-04-19	04:00:00	-200	884.75	-200	2.06974	589.25	-200	1238.25	-200	1442.5	635	13	78.175	1.16636
2004-04-19	05:00:00	-200	888	-200	2.16966	596.5	-200	1242.25	-200	1427.75	670.5	14.25	70.1	1.13279
2004-04-19	06:00:00	-200	1100.67	-200	6.88212	851.667	-200	912.667	-200	1654.67	991.667	14.0333	70.9333	1.13056
2004-04-19	07:00:00	-200	1398.5	-200	16.5119	1195.25	-200	680.25	-200	1975.5	1308	15.35	64.2	1.1123
2004-04-19	08:00:00	-200	1324.5	-200	18.7117	1260	-200	651.75	-200	1968.75	1303	16.55	57.95	1.08264
2004-04-19	09:00:00	-200	1058.25	-200	8.53089	920.75	-200	875.75	-200	1593.5	893.25	18.825	47.975	1.03226
2004-04-19	10:00:00	-200	989.75	-200	6.75925	846.25	-200	946.75	-200	1502.75	714.75	19.5	43.275	0.970568
2004-04-19	11:00:00	-200	1018	-200	7.52233	879.25	-200	949.5	-200	1573.5	684.5	18.5	45.55	0.960631
2004-04-19	12:00:00	-200	1105.25	-200	10.8803	1010	-200	810.5	-200	1708.5	946.5	18.025	46.725	0.956888
2004-04-19	13:00:00	-200	1194	-200	13.3857	1096.5	-200	742.75	-200	1846.5	1049.25	16.475	58.15	1.08129
2004-04-19	14:00:00	-200	1088	-200	7.85049	893	-200	891.5	-200	1565	741	12.125	75.6	1.0662
2004-04-19	15:00:00	-200	1084	-200	8.84522	933.25	-200	871.75	-200	1602.25	801	11.1	75.575	0.997394
2004-04-19	16:00:00	-200	1206.5	-200	11.4823	1031.5	-200	797.25	-200	1700.75	969.25	10.475	79.05	1.00163
2004-04-19	17:00:00	-200	1186.25	-200	11.767	1041.5	-200	807.5	-200	1684.25	1037.75	9.95	80.475	0.985272
2004-04-19	18:00:00	-200	1052.5	-200	8.28292	910.75	-200	916.25	-200	1528	888.5	11.25	70.45	0.938861
2004-04-19	19:00:00	-200	1031.5	-200	7.88665	894.5	-200	920.75	-200	1507.75	879.25	10.7	71.525	0.919686
2004-04-19	20:00:00	-200	988.5	-200	6.74796	845.75	-200	960	-200	1475.5	846.25	9.875	73.95	0.900945
2004-04-19	21:00:00	-200	930	-200	4.6395	745	-200	1084.75	-200	1390.75	712.25	10.775	68.15	0.880582
2004-04-19	22:00:00	-200	951.25	-200	5.04615	765.75	-200	1055.5	-200	1431	746.75	10.15	73.975	0.91763
2004-04-19	23:00:00	-200	985.25	-200	5.33381	780	-200	1017	-200	1443.75	790.75	10.1	77.475	0.957906
2004-04-20	00:00:00	-200	936.75	-200	3.86146	703	-200	1135.75	-200	1376.75	636.75	9.925	77.7	0.94974
2004-04-20	01:00:00	-200	886.75	-200	2.9362	648	-200	1222.25	-200	1356.75	552.5	9.5	80.2	0.95333
2004-04-20	02:00:00	-200	806	-200	1.49526	544.25	-200	1429.25	-200	1289.5	448.75	9.525	79.7	0.948945
2004-04-20	03:00:00	-200	770.5	-200	0.840594	482.5	-200	1587.25	-200	1276.75	484.5	9.675	78.9	0.948722
2004-04-20	04:00:00	-200	801.5	-200	1.20291	518.5	-200	1523.25	-200	1314.75	540.25	9.75	80.025	0.966998
2004-04-20	05:00:00	-200	877.5	-200	2.87708	644.25	-200	1260.25	-200	1410	685	10.025	79.65	0.979974
2004-04-20	06:00:00	-200	1069.5	-200	7.61718	883.25	-200	942	-200	1624.5	925.25	10.275	79.375	0.992697
2004-04-20	07:00:00	-200	1430	-200	20.7172	1316.25	-200	638.25	-200	2069.25	1382	10.975	77.425	1.01354
2004-04-20	08:00:00	-200	1564.5	-200	29.9206	1549	-200	539.75	-200	2395.5	1645.25	12.35	69.225	0.990561
2004-04-20	09:00:00	-200	1364.5	-200	20.0929	1299	-200	637.25	-200	1999.25	1514	14.525	60.425	0.993647
2004-04-20	10:00:00	-200	1348.25	-200	17.1368	1214	-200	678	-200	1874.25	1508.75	16.05	56.25	1.01846
2004-04-20	11:00:00	-200	1311.25	-200	19.3794	1279	-200	647.5	-200	1990.5	1519.5	18.15	51.125	1.05513
2004-04-20	12:00:00	-200	1302.25	-200	18.6943	1259.5	-200	658	-200	1969.75	1471.25	22.975	37.525	1.03887
2004-04-20	13:00:00	-200	1249.5	-200	15.7751	1172.75	-200	719.75	-200	1869.5	1282	21.8	39.575	1.02089
2004-04-20	14:00:00	-200	1082.75	-200	10.2651	987.5	-200	859	-200	1643.25	1004	21.95	37.2	0.968349
2004-04-20	15:00:00	-200	1004.5	-200	7.88062	894.25	-200	956	-200	1530.25	713.75	23.8	31.4	0.9132
2004-04-20	16:00:00	-200	1129	-200	13.7047	1107	-200	843.5	-200	1742	940.25	25.875	26.9	0.884469
2004-04-20	17:00:00	-200	1327.25	-200	19.7437	1289.25	-200	711.5	-200	1937.5	1272	25.85	29.875	0.980845
2004-04-20	18:00:00	-200	1427.5	-200	25.3224	1437.25	-200	599.25	-200	2156	1525.5	22.6	39.45	1.06788
2004-04-20	19:00:00	-200	1425.5	-200	23.8531	1399.75	-200	612	-200	2102	1488	19.925	45.025	1.03644
2004-04-20	20:00:00	-200	1310.25	-200	20.5899	1312.75	-200	662.75	-200	1958.25	1474.5	17.925	47.45	0.965733
2004-04-20	21:00:00	-200	1113.75	-200	12.2651	1058.75	-200	791.5	-200	1704	1181.75	16.775	50.375	0.954458
2004-04-20	22:00:00	-200	990.75	-200	7.74842	888.75	-200	931.5	-200	1549.75	932.5	15.975	52.025	0.937535
2004-04-20	23:00:00	-200	1089.25	-200	9.01697	940	-200	865.75	-200	1589	1000.75	14.2	59.1	0.951999
2004-04-21	00:00:00	-200	911.25	-200	4.53893	739.75	-200	1070.75	-200	1411.75	755.75	14.175	56.65	0.911083
2004-04-21	01:00:00	-200	1004.5	-200	5.78062	801.5	-200	975.5	-200	1474	951.5	12.25	67.7	0.962516
2004-04-21	02:00:00	-200	862.75	-200	3.18601	663.5	-200	1172.25	-200	1381	807.5	13.2	61.725	0.932808
2004-04-21	03:00:00	-200	856.5	-200	3.01584	653	-200	1196.75	-200	1375.25	779	10.9	71	0.924906
2004-04-21	04:00:00	-200	803.5	-200	2.01211	585	-200	1301	-200	1318.5	716.5	11.3	67.6	0.903809
2004-04-21	05:00:00	-200	870.75	-200	3.70271	694	-200	1159.5	-200	1420.5	779	10.1	71.825	0.888049
2004-04-21	06:00:00	-200	1034.5	-200	8.7315	928.75	-200	886.5	-200	1598.75	1008.5	10.225	70.925	0.884123
2004-04-21	07:00:00	-200	1512.75	-200	27.0326	1479.75	-200	572.25	-200	2248.75	1594.5	11.75	66	0.908528
2004-04-21	08:00:00	-200	1726.25	-200	40.2601	1776.25	-200	478	-200	2684	1939.75	14.025	58.2	0.927118
2004-04-21	09:00:00	-200	1396	-200	19.9762	1295.75	-200	619.25	-200	1990.75	1628.25	17	50.2	0.964596
2004-04-21	10:00:00	-200	1333	-200	17.0613	1211.75	-200	667.5	-200	1854.25	1572.75	22.325	36.95	0.983811
2004-04-21	11:00:00	-200	1161.25	-200	11.0469	1016	-200	849.25	-200	1641.75	1186.75	24.45	30.9	0.934048
2004-04-21	12:00:00	-200	1081.25	-200	10.5913	999.5	-200	899.75	-200	1561	900.25	25.875	26.675	0.877071
2004-04-21	13:00:00	-200	1075.25	-200	10.5435	997.75	-200	914	-200	1573.75	800	25.825	26.05	0.854009
2004-04-21	14:00:00	-200	1055.25	-200	9.64557	964.25	-200	953	-200	1512.5	769.5	26.35	24.825	0.839296
2004-04-21	15:00:00	-200	1052.5	-200	9.33874	952.5	-200	988	-200	1483	758	27	22.225	0.780473
2004-04-21	16:00:00	-200	1087.25	-200	12.7497	1075.25	-200	943.5	-200	1557.75	885.75	27.3	20.45	0.730796
2004-04-21	17:00:00	-200	1303.5	-200	19.7973	1290.75	-200	765	-200	1838.25	1218.75	25.85	24.1	0.791242
2004-04-21	18:00:00	-200	1625	-200	32.468	1607.75	-200	601.25	-200	2271.25	1724.5	25.25	28.875	0.91512
2004-04-21	19:00:00	-200	1648.5	-200	33.6012	1633.25	-200	584	-200	2328	1744.5	23.775	33.7	0.978632
2004-04-21	20:00:00	-200	1442.75	-200	26.0409	1455.25	-200	634.5	-200	2072.5	1600	21.4	35.975	0.905856
2004-04-21	21:00:00	-200	1209.33	-200	16.4376	1193	-200	753	-200	1737.33	1310	19.8	39.4667	0.901571
2004-04-21	22:00:00	-200	1104.75	-200	10.5982	999.75	-200	846.75	-200	1572.5	1208.25	19.225	42.05	0.92731
2004-04-21	23:00:00	-200	1020.25	-200	7.13644	862.75	-200	932.5	-200	1491.75	1074	18.825	45.8	0.985458
2004-04-22	00:00:00	-200	990.75	-200	6.35778	828.25	-200	973.25	-200	1469	992.5	17.125	50.75	0.982794
2004-04-22	01:00:00	-200	937.25	-200	4.55324	740.5	-200	1058.25	-200	1420	922.5	16.225	53.4	0.977533
2004-04-22	02:00:00	-200	881.5	-200	3.03187	654	-200	1141.25	-200	1376.5	819.25	16.05	53.525	0.969121
2004-04-22	03:00:00	-200	843.25	-200	2.17314	596.75	-200	1241.5	-200	1340.5	726.5	14.3	59.225	0.960097
2004-04-22	04:00:00	-200	819.25	-200	1.74394	564.5	-200	1294.5	-200	1315.5	694	13.275	62.55	0.949826
2004-04-22	05:00:00	-200	834	-200	2.15576	595.5	-200	1276.25	-200	1334.75	727.25	13.375	59.525	0.909693
2004-04-22	06:00:00	-200	976.5	-200	5.73841	799.5	-200	989.5	-200	1473.5	926.25	12.175	64.05	0.906228
2004-04-22	07:00:00	-200	1234.25	-200	13.7506	1108.5	-200	767	-200	1728.75	1193.5	13.875	57.225	0.902916
2004-04-22	08:00:00	-200	1403.25	-200	21.5992	1340.25	-200	622.5	-200	2003	1501.5	15.175	53.15	0.910734
2004-04-22	09:00:00	-200	1537.5	-200	26.1413	1457.75	-200	592.75	-200	2185.5	1742.75	19.2	41.575	0.915428
2004-04-22	10:00:00	-200	1342.5	-200	20.1019	1299.25	-200	694	-200	1945	1542	23.7	30.625	0.885371
2004-04-22	11:00:00	-200	1242.75	-200	15.4281	1162	-200	765.75	-200	1730.75	1353.75	26.1	26.775	0.89206
2004-04-22	12:00:00	-200	1200.5	-200	13.56	1102.25	-200	814	-200	1681.5	1175	28.125	24.375	0.913763
2004-04-22	13:00:00	-200	1120.75	-200	11.1446	1019.5	-200	892.5	-200	1584.75	915.5	28.3	23.925	0.906014
2004-04-22	14:00:00	-200	1086.75	-200	12.1633	1055.25	-200	908.25	-200	1562.25	817.5	27.975	21.025	0.781365
2004-04-22	15:00:00	-200	1165	-200	17.4996	1224.75	-200	823.5	-200	1676	1027.75	30.8	16.4	0.716724
2004-04-22	16:00:00	-200	1224	-200	19.0619	1270	-200	805.75	-200	1738.5	1113	31.275	16.175	0.726206
2004-04-22	17:00:00	-200	1431	-200	27.1142	1481.75	-200	678.5	-200	2025	1431	29.425	20.45	0.826238
2004-04-22	18:00:00	-200	1433	-200	28.2787	1510	-200	661	-200	2037.5	1503	25.75	24.325	0.793951
2004-04-22	19:00:00	-200	1526.75	-200	34.9897	1664	-200	587	-200	2237.75	1774.75	23.775	29.475	0.85594
2004-04-22	20:00:00	-200	1387.25	-200	22.365	1360.75	-200	701	-200	1931.75	1504.75	22	34.775	0.907957
2004-04-22	21:00:00	-200	1158.25	-200	13.4992	1100.25	-200	834.75	-200	1658.5	1210.5	20.175	37.425	0.874751
2004-04-22	22:00:00	-200	1008.5	-200	8.19687	907.25	-200	982.25	-200	1466.25	872.25	19.25	38.75	0.85585
2004-04-22	23:00:00	-200	1025.5	-200	7.77838	890	-200	976.25	-200	1466.75	855.25	17.875	43.65	0.885643
2004-04-23	00:00:00	-200	1118.5	-200	10.0367	979	-200	873	-200	1593	1170.25	17.225	47.9	0.9334
2004-04-23	01:00:00	-200	999.75	-200	6.59629	839	-200	958	-200	1467	1024.25	16.35	49.65	0.916036
2004-04-23	02:00:00	-200	865.5	-200	3.37694	675	-200	1155.25	-200	1336.5	841.25	16.675	46.5	0.875549
2004-04-23	03:00:00	-200	847.5	-200	2.83404	641.5	-200	1202.25	-200	1325	760	14.625	53.025	0.877508
2004-04-23	04:00:00	-200	843.75	-200	2.33582	608.25	-200	1212.75	-200	1313.5	803	14.125	53.85	0.863301
2004-04-23	05:00:00	0.6	852.25	46	2.90855	646.25	59	1186	59	1321.25	792.75	14.2	52.225	0.841254
2004-04-23	06:00:00	0.8	922.5	56	4.86799	756.75	72	1040.75	67	1417.75	905.5	14.325	55.45	0.90033
2004-04-23	07:00:00	4	1490	452	22.6196	1367.5	244	626.5	95	2119.25	1540.5	13.975	57.95	0.920201
2004-04-23	08:00:00	5.6	1662	880	31.0803	1576	351	522.5	123	2416.5	1861	15.45	53.275	0.928858
2004-04-23	09:00:00	5	1552.5	759	22.121	1354.25	358	620.75	142	2030	1895.25	19.125	42.125	0.923273
2004-04-23	10:00:00	3.2	1423	394	18.2693	1247.25	245	705.5	142	1887.25	1683.75	23.725	30.975	0.896824
2004-04-23	11:00:00	3.8	1457.75	639	21.9527	1349.75	240	677.25	169	1946.5	1731	26.875	25.65	0.894207
2004-04-23	12:00:00	3.3	1348.5	541	20.075	1298.5	179	727.75	142	1838	1401.75	29.725	20.625	0.847757
2004-04-23	13:00:00	3	1326.25	468	18.8952	1265.25	160	756.5	136	1834.5	1245.75	29.175	21.525	0.857279
2004-04-23	14:00:00	3.2	1356	483	20.5626	1312	174	729	147	1864.5	1341.5	29.575	20.075	0.818092
2004-04-23	15:00:00	4.4	1460	682	25.3323	1437.5	260	680.25	196	1953.25	1488.75	30	19.4	0.810046
2004-04-23	16:00:00	4.6	1497.25	698	25.7704	1448.5	281	679.25	186	1984.75	1531.5	29.5	20.05	0.813568
2004-04-23	17:00:00	5.2	1645	832	30.6486	1566	284	599.25	177	2227.5	1909	27	26.775	0.940255
2004-04-23	18:00:00	4.8	1556.75	872	27.1449	1482.5	250	614.5	164	2086.5	1757.25	24.875	30.775	0.953975
2004-04-23	19:00:00	5.6	1746.75	899	32.479	1608	281	556.5	161	2334.5	1982.5	23.1	36.725	1.02436
2004-04-23	20:00:00	4.6	1481.75	692	20.7992	1318.5	230	660.25	146	1975	1702.75	21.475	40.85	1.03329
2004-04-23	21:00:00	1.8	1211	145	10.8734	1009.75	98	816	98	1618.75	1245.75	20.45	41.5	0.9864
2004-04-23	22:00:00	2.2	1293.5	208	12.9801	1083	121	770.25	108	1687.25	1320.5	19.2	44.85	0.987539
2004-04-23	23:00:00	2	1299.75	204	11.81	1043	110	776.5	107	1658.75	1375.25	18.75	47.725	1.02214
2004-04-24	00:00:00	2.8	1401.75	240	13.4159	1097.5	161	735.75	113	1729	1455.5	18.2	49.675	1.02838
2004-04-24	01:00:00	2.6	1348.5	251	13.4008	1097	148	707	100	1763	1442	16.125	57.45	1.0451
2004-04-24	02:00:00	1.8	1160.5	173	8.95956	937.75	109	826.75	87	1597.25	1243.25	16.325	55.25	1.01776
2004-04-24	03:00:00	1.1	1021.5	113	5.7859	801.75	-200	915.75	-200	1480.5	1078.25	15.675	53.625	0.948308
2004-04-24	04:00:00	-200	947.5	55	3.80381	699.75	45	1045	60	1430	938.5	16.9	49.825	0.951435
2004-04-24	05:00:00	0.7	932.75	65	3.74652	696.5	71	1045.25	65	1402.75	936.75	14.775	57.725	0.964413
2004-04-24	06:00:00	0.9	1021	119	5.74368	799.75	75	930.5	64	1482.5	1018.5	14	59.725	0.949898
2004-04-24	07:00:00	1.5	1133.5	151	10.0234	978.5	106	794	73	1639	1139.5	14.6	56.8	0.938491
2004-04-24	08:00:00	2.5	1310.5	305	14.9574	1147.25	166	681	86	1838	1351.25	16.7	51.9	0.978754
2004-04-24	09:00:00	3	1408.75	415	15.6375	1168.5	188	684.75	105	1874.25	1459.25	19.975	45	1.03903
2004-04-24	10:00:00	2.6	1301	321	12.2578	1058.5	161	786.5	107	1726.5	1297	23.875	33.675	0.983746
2004-04-24	11:00:00	2.6	1354.25	358	14.4148	1130	139	764.5	114	1808	1291.25	26.75	29.5	1.02095
2004-04-24	12:00:00	2.6	1391.25	350	14.5869	1135.5	134	737.5	105	1840	1296.25	27.2	32.35	1.14934
2004-04-24	13:00:00	1.9	1199.67	238	8.7294	928.667	84	879.333	74	1623	972.333	26.9333	32.0667	1.12171
2004-04-24	14:00:00	2	1337.75	215	11.0399	1015.75	98	797.5	95	1766.25	1193.5	24.35	41.8	1.25606
2004-04-24	15:00:00	1.7	1222.5	192	8.95319	937.5	91	883.5	89	1610	879.5	25.55	36.05	1.16289
2004-04-24	16:00:00	1.9	1278.25	205	10.6735	1002.5	99	845	95	1690.5	909.25	27	31.825	1.1176
2004-04-24	17:00:00	1.8	1256.5	165	9.88345	973.25	90	860	93	1633.75	838.75	27.475	31.625	1.1417
2004-04-24	18:00:00	2.8	1496.5	283	15.7184	1171	147	724.75	123	1899.25	1248.25	24.925	38.075	1.18376
2004-04-24	19:00:00	3.5	1567.25	467	19.3971	1279.5	177	661	134	1969.5	1475.5	23.425	39.65	1.12763
2004-04-24	20:00:00	3.4	1502.5	485	16.7524	1202.5	162	651.25	126	1863	1501.75	21.2	50.775	1.26313
2004-04-24	21:00:00	2	1169.25	202	6.84989	850.25	88	905.75	79	1584.25	872.75	15.625	73.475	1.29525
2004-04-24	22:00:00	1.1	1007.25	64	2.97193	650.25	53	1157.25	54	1403.75	528	12.85	79.675	1.17735
2004-04-24	23:00:00	1.3	1003.75	71	3.24775	667.25	68	1156.5	69	1365	492	11.525	76.925	1.0436
2004-04-25	00:00:00	1.2	967.25	84	3.14513	661	61	1180.5	67	1320.75	463	12.175	66.825	0.945491
2004-04-25	01:00:00	1.3	983.5	70	3.93293	707	71	1131	73	1359	493.75	12.425	64.05	0.920948
2004-04-25	02:00:00	1	931.25	61	3.61574	689	63	1160.75	73	1317.25	503.25	12.725	58.7	0.860469
2004-04-25	03:00:00	1.3	965.75	92	4.48189	736.75	-200	1083.25	-200	1363.25	580.75	12.6	58.65	0.852855
2004-04-25	04:00:00	-200	776.75	40	1.2301	521	23	1534.75	33	1121.25	350	12.45	51.2	0.73737
2004-04-25	05:00:00	0.3	763	20	0.734469	470.75	14	1783.25	20	1098	305	12.475	50.925	0.73459
2004-04-25	06:00:00	0.5	804.25	31	1.05546	504.5	34	1718	37	1148	328.75	12.85	49.3	0.728502
2004-04-25	07:00:00	0.6	830	41	1.39	535.25	42	1496.25	50	1184.25	374.5	13.5	48.6	0.748692
2004-04-25	08:00:00	0.6	832.5	40	1.59765	552.75	40	1475.5	45	1180.25	373.25	14.375	45.9	0.74764
2004-04-25	09:00:00	0.8	874.75	35	2.26448	603.25	48	1369.75	48	1206.25	384.5	15.1	43.9	0.748678
2004-04-25	10:00:00	1	881.5	44	2.52573	621.25	61	1345.75	56	1215.75	403.25	16.625	38.55	0.723592
2004-04-25	11:00:00	0.9	862	71	2.72576	634.5	58	1320	58	1193	393	17.175	34.95	0.678933
2004-04-25	12:00:00	1	862.5	66	2.74111	635.5	57	1289.75	52	1185	388.25	17.4	33.925	0.668317
2004-04-25	13:00:00	0.8	829.75	46	2.16618	596.25	54	1388.5	52	1145.25	371	17.875	30.725	0.623399
2004-04-25	14:00:00	0.7	806.75	50	1.99865	584	41	1488	44	1104	346.5	18.325	27.2	0.567469
2004-04-25	15:00:00	0.9	872.5	51	3.37694	675	57	1342.5	59	1181	395.75	19.425	25.7	0.573752
2004-04-25	16:00:00	1.3	930.75	64	4.52464	739	83	1273.75	74	1219	473.75	20.15	24.125	0.563024
2004-04-25	17:00:00	1.4	918.25	138	4.68772	747.5	81	1228.25	76	1218.75	505.25	19.6	24.925	0.562453
2004-04-25	18:00:00	1.5	1000.5	137	5.97755	810.75	98	1122.25	83	1343.75	624.75	18.475	27.75	0.584334
2004-04-25	19:00:00	2.7	1169.25	303	11.6956	1039	124	883.25	100	1549.75	940.75	17.8	30.35	0.612933
2004-04-25	20:00:00	2.5	1084.75	204	8.18461	906.75	133	975.75	101	1418.75	893	16.575	33.95	0.635259
2004-04-25	21:00:00	1.4	939.5	95	5.10615	768.75	100	1102.75	90	1309.5	730.75	15.45	36.975	0.644665
2004-04-25	22:00:00	2.8	1125.5	347	12.9876	1083.25	116	874.5	93	1654.25	954.75	14.775	39.475	0.65951
2004-04-25	23:00:00	2.1	977.75	252	7.02122	857.75	102	1013.25	79	1378.5	760.5	14.5	42	0.689566
2004-04-26	00:00:00	1.1	893	66	3.85702	702.75	55	1192.25	57	1283.25	515.25	14.125	44.95	0.72062
2004-04-26	01:00:00	0.7	837.5	45	2.23268	601	33	1360.5	43	1219.5	433.75	14.225	45.45	0.733286
2004-04-26	02:00:00	0.4	802.75	36	1.29921	527.25	17	1513	25	1152	369	14.1	45.275	0.724677
2004-04-26	03:00:00	0.3	775	26	0.787898	476.75	-200	1721.75	-200	1115	335	14	44.25	0.703775
2004-04-26	04:00:00	-200	767	17	0.595884	454.25	10	1825.5	17	1090.75	318.5	14.125	42.975	0.688958
2004-04-26	05:00:00	0.4	808.5	21	1.22464	520.5	35	1574.5	44	1158.25	377.75	13.875	43.875	0.692275
2004-04-26	06:00:00	0.8	897.5	60	3.39798	676.25	70	1271.25	72	1306.5	516.75	13.975	43.825	0.695907
2004-04-26	07:00:00	1.9	1052.5	155	7.54599	880.25	116	981.75	91	1463.5	785.75	14.4	43.6	0.711305
2004-04-26	08:00:00	2.1	1032.5	235	8.86423	934	134	917	89	1489.75	844	15.05	41.725	0.709339
2004-04-26	09:00:00	1.4	941.25	89	5.3287	779.75	113	1079.75	84	1342.5	719.75	16.275	38.4	0.705153
2004-04-26	10:00:00	1.4	941.25	76	5.36448	781.5	110	1102.25	83	1328	667.75	18.35	32.35	0.675956
2004-04-26	11:00:00	1.3	916.5	101	5.17148	772	98	1097.75	78	1311.25	604.5	18.825	31.7	0.682075
2004-04-26	12:00:00	1.5	976.5	109	6.55721	837.25	96	1038	80	1413.25	646.25	19.575	30.925	0.69678
2004-04-26	13:00:00	1.6	993.5	143	6.86126	850.75	95	1018.25	75	1436.25	640.25	20.175	30.7	0.717564
2004-04-26	14:00:00	1.3	942.25	104	5.42606	784.5	86	1065	77	1365	570.75	19.725	32.525	0.739594
2004-04-26	15:00:00	1.4	981	107	5.96148	810	86	1059.75	77	1394.5	604.75	20.675	31.55	0.760243
2004-04-26	16:00:00	1.5	983.5	133	6.44609	832.25	91	1033.75	81	1409.5	635.5	19.975	32.675	0.754454
2004-04-26	17:00:00	2.2	1116.25	171	10.6873	1003	119	864.25	101	1625.25	886.25	18.65	35.4	0.753514
2004-04-26	18:00:00	3.2	1180.5	405	13.9039	1113.5	147	787	119	1685.25	1032.25	18.35	35.9	0.750134
2004-04-26	19:00:00	3	1163	334	12.5211	1067.5	135	811.25	111	1615.75	977.25	17.8	37.475	0.756826
2004-04-26	20:00:00	2.6	1081	236	9.26754	949.75	124	907.25	109	1496.25	924.25	17.275	38.8	0.758431
2004-04-26	21:00:00	1.6	1016.75	99	6.6579	841.75	89	999.75	101	1440.75	845.5	17.3	38.8	0.759613
2004-04-26	22:00:00	1.5	966	93	5.28794	777.75	79	1056.75	89	1358.5	754.75	16.4	40.75	0.754191
2004-04-26	23:00:00	1.2	924.25	82	3.97338	709.25	63	1158	75	1318	609.75	16.05	41.35	0.748681
2004-04-27	00:00:00	0.8	860.75	51	2.2362	601.25	39	1351	51	1225.25	439.25	15.4	43.05	0.74822
2004-04-27	01:00:00	0.7	826	41	1.68102	559.5	25	1424.25	39	1197	402	15.725	42.5	0.753942
2004-04-27	02:00:00	0.5	845.5	31	1.64993	557	19	1384.75	32	1211.5	405.5	15.625	43.4	0.765076
2004-04-27	03:00:00	0.5	841.5	41	1.50715	545.25	-200	1423	-200	1223.5	423.5	15.225	45.75	0.786414
2004-04-27	04:00:00	-200	909	41	2.45805	616.667	34	1236	49	1301.67	558	14.6667	49.9	0.827977
2004-04-27	05:00:00	0.7	929.75	38	3.28919	669.75	58	1142.75	68	1339.25	745.75	15.525	47.275	0.828153
2004-04-27	06:00:00	1.4	1119.5	111	8.88961	935	112	842.75	76	1593	1125.5	14.425	53.1	0.867667
2004-04-27	07:00:00	4.1	1518.25	584	23.4197	1388.5	314	588.5	122	2100.75	1703	15.9	48.525	0.870351
2004-04-27	08:00:00	4.6	1460.75	633	23.7662	1397.5	240	629.75	129	2050	1627.5	18.125	40.25	0.829405
2004-04-27	09:00:00	1.9	1074.75	145	7.91684	895.75	128	937.5	94	1487.25	935.75	19.575	35.95	0.809999
2004-04-27	10:00:00	1.9	1061.25	155	8.21528	908	141	967.5	99	1455	890.25	22.775	29.1	0.796026
2004-04-27	11:00:00	1.7	1065.75	128	8.7946	931.25	118	978.5	81	1474	757	24.75	25.325	0.779251
2004-04-27	12:00:00	2.4	1179	255	14.6183	1136.5	132	829	87	1651.25	948.5	27.15	21.975	0.778467
2004-04-27	13:00:00	3	1251	411	17.9512	1238	150	772.5	107	1779	1108.75	28.15	20.45	0.767733
2004-04-27	14:00:00	2	1120	173	11.9537	1048	121	898	95	1560.25	869.75	25.425	24.15	0.773308
2004-04-27	15:00:00	2.7	1187.25	277	14.7914	1142	149	839.5	110	1651	1011.25	25.7	23.775	0.773721
2004-04-27	16:00:00	2.2	1144.5	259	12.4771	1066	120	903.25	99	1592	885.25	27.15	22.05	0.781124
2004-04-27	17:00:00	2.9	1214.5	274	15.5005	1164.25	155	817	113	1689	1015.25	27.025	22.35	0.786007
2004-04-27	18:00:00	3.4	1317	377	17.7035	1230.75	172	765.5	127	1798	1154.75	24.525	27.775	0.843326
2004-04-27	19:00:00	3.9	1387.5	457	21.6178	1340.75	177	702.25	131	1954.75	1314.75	23.675	30.2	0.871784
2004-04-27	20:00:00	3.6	1295.25	555	18.9303	1266.25	181	716.25	137	1848.5	1358.75	21.5	34.525	0.874621
2004-04-27	21:00:00	2.5	1152.75	279	12.4697	1065.75	135	810.5	122	1651	1194	19.875	37.8	0.867469
2004-04-27	22:00:00	1.8	1077.5	137	8.80092	931.5	99	904.5	100	1511	950.5	18.9	40.575	0.877076
2004-04-27	23:00:00	2	1132.5	203	10.9426	1012.25	111	806	108	1607.5	1054.25	17.9	43.5	0.883969
2004-04-28	00:00:00	1.3	1055	101	7.98949	898.75	72	880.25	83	1504	979.5	17.375	46.325	0.911177
2004-04-28	01:00:00	1	953	86	4.44875	735	54	999	74	1395.75	898	18.1	44.65	0.91865
2004-04-28	02:00:00	0.6	891.75	51	2.79904	639.25	41	1138.5	64	1358.5	802.75	16.5	50.1	0.933063
2004-04-28	03:00:00	0.6	894.5	47	2.6799	631.5	-200	1167	-200	1346.75	684.25	14.15	56.925	0.914051
2004-04-28	04:00:00	-200	858.75	35	2.24679	602	24	1209.25	40	1320.75	643.75	14.7	56.175	0.934068
2004-04-28	05:00:00	0.5	856	33	2.48503	618.5	29	1191.25	39	1345	676.75	16.325	52.775	0.972168
2004-04-28	06:00:00	1.1	1030	95	7.52824	879.5	76	892	69	1538.5	996	13.9	60.725	0.959669
2004-04-28	07:00:00	5.5	1688.75	754	30.4015	1560.25	321	528.75	104	2395.5	1735.75	15	58.275	0.987567
2004-04-28	08:00:00	4.2	1486.25	588	22.0087	1351.25	274	571	100	2111.75	1692	16.125	54.75	0.995978
2004-04-28	09:00:00	4.6	1591.75	658	24.74	1422.5	322	577	146	2155.25	2108.25	19.25	46.4	1.02481
2004-04-28	10:00:00	3.4	1468.75	372	18.4249	1251.75	255	691.5	155	1903.25	1806.75	24.225	33.85	1.00965
2004-04-28	11:00:00	2.8	1364	386	16.8356	1205	196	722.75	139	1850.25	1565.75	26.7	28.675	0.989504
2004-04-28	12:00:00	2.5	1284.75	333	14.2048	1123.25	136	754.75	121	1741.25	1293	27.35	28.175	1.00979
2004-04-28	13:00:00	2.4	1310.5	293	15.6698	1169.5	119	747.75	108	1786.75	1219.25	28.125	26.925	1.00936
2004-04-28	14:00:00	3.2	1416	511	21.8874	1348	169	684	126	1968.75	1329.75	27.7	26.5	0.969262
2004-04-28	15:00:00	3.5	1387.25	559	20.7719	1317.75	197	700.5	145	1889.5	1298.5	28.425	23.425	0.893508
2004-04-28	16:00:00	2.9	1329.25	375	16.1581	1184.5	140	768.25	121	1750	1111	28.4	26.05	0.992201
2004-04-28	17:00:00	3.6	1495.75	509	19.8241	1291.5	178	680.25	145	1878.25	1299.75	27.35	30	1.0752
2004-04-28	18:00:00	4.8	1675.75	790	28.895	1524.75	223	567.25	160	2226	1652.5	24.325	37.325	1.11993
2004-04-28	19:00:00	5.4	1724	816	28.2683	1509.75	222	562.25	155	2252.25	1716.25	23.075	42.175	1.17461
2004-04-28	20:00:00	5.3	1641.75	804	24.858	1425.5	265	597	162	2117.25	1719.75	21.75	43.65	1.12262
2004-04-28	21:00:00	2.7	1266.75	332	13.1372	1088.25	151	764.25	129	1740	1338.5	19.825	46.775	1.07016
2004-04-28	22:00:00	1.4	1145.75	156	8.58711	923	79	845	96	1574.75	1165.75	19.575	49.8	1.12206
2004-04-28	23:00:00	1.6	1215.5	143	9.52102	959.5	87	787.75	92	1662.25	1255.75	17.9	56.2	1.14205
2004-04-29	00:00:00	1.5	1127.75	117	7.79638	890.75	88	837.5	89	1574	1124.5	17.4	55.65	1.0963
2004-04-29	01:00:00	1	1041.75	84	5.16644	771.75	51	923.25	61	1495	968.25	16.775	59.475	1.12688
2004-04-29	02:00:00	0.6	925.5	60	2.79516	639	34	1115.25	54	1409	814	15.925	60.15	1.08055
2004-04-29	03:00:00	0.4	898	76	2.33582	608.25	-200	1154.25	-200	1385.5	743.25	15.625	61.175	1.07842
2004-04-29	04:00:00	-200	889	40	2.45928	616.75	31	1167.5	44	1381.75	757.75	14.55	63.425	1.04464
2004-04-29	05:00:00	0.8	958.75	64	4.42043	733.5	76	1038	57	1469.5	860.5	13.325	66.975	1.02028
2004-04-29	06:00:00	1.5	1096.5	148	9.42969	956	139	826.5	68	1620	1046.75	12.875	66.525	0.984614
2004-04-29	07:00:00	4.9	1674	635	29.8141	1546.5	293	539.25	95	2404.5	1665.25	14.775	61.275	1.02372
2004-04-29	08:00:00	7.2	1771.25	1129	36.1593	1689.5	368	461.25	125	2572.25	1982	16.125	56.475	1.02736
2004-04-29	09:00:00	3.5	1408.25	475	18.0369	1240.5	250	647.5	135	1886	1711.25	18.6	47.8	1.01432
2004-04-29	10:00:00	2.1	1155.5	220	10.8526	1009	145	874.5	118	1583	1203.5	23.75	30.25	0.877139
2004-04-29	11:00:00	1.5	1041.75	105	9.02975	940.5	110	971	91	1490.5	871.25	25.375	24.95	0.796575
2004-04-29	12:00:00	2	1167	190	14.3525	1128	104	828.75	89	1716.25	1040.25	25.55	25.525	0.823375
2004-04-29	13:00:00	3.8	1397.75	516	22.3368	1360	205	656.25	129	2037.25	1438.75	24.95	29.95	0.932527
2004-04-29	14:00:00	3.4	1457.5	346	20.8722	1320.5	201	654	122	2023.25	1516	22.45	37.875	1.01605
2004-04-29	15:00:00	4.4	1554	565	23.0563	1379	266	613.5	138	2151.25	1692.75	21.65	43.975	1.12417
2004-04-29	16:00:00	3.9	1495	483	21.239	1330.5	246	615.25	136	2068.75	1635.25	21.375	44.45	1.11757
2004-04-29	17:00:00	4.9	1559.75	651	24.7793	1423.5	247	579	143	2175.5	1687.5	20.825	45.3	1.10157
2004-04-29	18:00:00	5.4	1663.5	657	28.6332	1518.5	271	553.25	145	2312.25	1819.5	20.175	48.575	1.13536
2004-04-29	19:00:00	6.5	1760.67	830	32.582	1610.33	332	502	146	2488.33	2006	20.2333	50.8333	1.19239
2004-04-29	20:00:00	4.3	1524	435	19.238	1275	245	607.75	122	2046.25	1740.25	18.6	57.65	1.22334
2004-04-29	21:00:00	2.9	1398.25	209	16.2893	1188.5	180	646	112	1930.75	1577	18.2	58.8	1.21729
2004-04-29	22:00:00	2.7	1341.5	202	13.6666	1105.75	156	694	102	1856	1443	17.85	60.975	1.23524
2004-04-29	23:00:00	2.8	1432.75	174	13.6056	1103.75	172	681	97	1876.25	1411.25	16.975	70.65	1.35543
2004-04-30	00:00:00	2.3	1297.25	170	11.1236	1018.75	137	732.75	85	1822.75	1216.5	16.2	76.875	1.40506
2004-04-30	01:00:00	1.7	1178.75	116	7.63502	884	91	830	76	1696.25	1086	15.725	78.6	1.39435
2004-04-30	02:00:00	1.2	1096.75	91	5.94008	809	80	897.25	74	1628.25	1049.5	15.725	78.45	1.39169
2004-04-30	03:00:00	1	1053.75	71	4.95178	761	-200	962.75	-200	1597.75	964.5	15.675	77.375	1.3683
2004-04-30	04:00:00	-200	1017.25	59	4.00496	711	46	1008.5	56	1554.25	906.25	15.4	78.45	1.36348
2004-04-30	05:00:00	0.8	1005	48	4.50087	737.75	68	1004.5	66	1563.25	916.5	15.65	74.725	1.31936
2004-04-30	06:00:00	1.7	1205.75	111	9.25461	949.25	162	818.25	90	1771	1115.75	15.925	73.125	1.31364
2004-04-30	07:00:00	3	1457.75	345	18.3298	1249	213	662	111	2033	1379.75	16.55	68.175	1.27367
2004-04-30	08:00:00	3.4	1405.25	332	19.9404	1294.75	161	638	103	2064.5	1377.5	18.725	57.625	1.23227
2004-04-30	09:00:00	3.3	1381.25	344	16.6195	1198.5	209	684.75	117	1969.5	1364.75	17.575	65	1.2945
2004-04-30	10:00:00	2.7	1314.5	212	12.6463	1071.75	191	735.5	116	1833.25	1273	16.3	73.175	1.34585
2004-04-30	11:00:00	2.6	1332.25	166	12.9354	1081.5	215	706.5	109	1889	1241.5	16.05	78.475	1.42086
2004-04-30	12:00:00	3.2	1361.5	214	14.8782	1144.75	212	673	116	1972.5	1294.25	17.25	72.375	1.41253
2004-04-30	13:00:00	3.4	1398.5	377	17.3896	1221.5	202	642.5	115	2060.75	1413	19.35	60.95	1.35446
2004-04-30	14:00:00	2.6	1310.25	210	15.3639	1160	153	694.75	94	1939.25	1224.25	21.4	50.925	1.2823
2004-04-30	15:00:00	3.4	1399.25	265	16.6859	1200.5	185	699.25	121	1971.25	1317.75	22.7	45.775	1.24655
2004-04-30	16:00:00	4	1523.5	365	17.994	1239.25	210	643.5	114	2138.75	1403.5	20.9	60.8	1.48524
2004-04-30	17:00:00	4.5	1487	454	19.2027	1274	215	640.5	110	2132.75	1470.75	21.025	54.25	1.33533
2004-04-30	18:00:00	4.2	1479.75	460	20.9911	1323.75	215	622	122	2162.25	1623	20.775	54.425	1.31945
2004-04-30	19:00:00	5.7	1625.75	642	26.8798	1476	281	555	135	2355.75	1786	19.8	58.625	1.33922
2004-04-30	20:00:00	4.4	1449.25	501	19.4946	1282.25	254	625	133	2099.5	1568.5	19.075	61.075	1.3345
2004-04-30	21:00:00	3.1	1362.5	234	15.1004	1151.75	189	683.75	110	1951.25	1494.75	18.2	65.35	1.35289
2004-04-30	22:00:00	3	1371.25	212	14.5947	1135.75	174	689	102	1926.75	1471.25	18.075	66.1	1.35787
2004-04-30	23:00:00	3.1	1406.25	275	13.6971	1106.75	167	718.25	108	1871.5	1383.75	17.7	66.875	1.34222
2004-05-01	00:00:00	3.5	1424.5	275	15.188	1154.5	185	709.25	110	1935.75	1788.75	17.775	66.75	1.34596
2004-05-01	01:00:00	2.4	1179	-200	9.2934	950.75	129	825.75	84	1723.5	1322.5	17.275	68.275	1.33458
2004-05-01	02:00:00	1.6	1046.75	-200	6.46271	833	85	939.25	71	1647.25	1081	16.525	70.225	1.30992
2004-05-01	03:00:00	1.3	1009.25	-200	6.28093	824.75	-200	950	-200	1628.5	937.75	15.65	73.075	1.29023
2004-05-01	04:00:00	-200	882.25	-200	3.54251	684.75	35	1133.5	42	1492	672.75	16.175	69.9	1.27557
2004-05-01	05:00:00	0.6	858	-200	2.56671	624	24	1205.25	32	1434.25	543	16.65	67.125	1.26192
2004-05-01	06:00:00	0.7	874.5	-200	3.10448	658.5	30	1180	35	1451.75	561.25	16.725	66.875	1.26313
2004-05-01	07:00:00	1.2	1012	-200	6.45163	832.5	75	915.75	67	1632.25	861.75	16.875	66.55	1.26883
2004-05-01	08:00:00	1.5	1049.25	-200	6.53492	836.25	79	926	73	1615	900.75	17.725	61.975	1.2458
2004-05-01	09:00:00	1.8	1131	-200	8.81989	932.25	104	854.25	86	1692.75	1048.25	19.425	54.575	1.21839
2004-05-01	10:00:00	2.1	1119.5	-200	8.78197	930.75	118	885.75	89	1651.5	970.5	21.575	46.075	1.17252
2004-05-01	11:00:00	1.9	1117.25	-200	9.15795	945.5	105	909	86	1656.5	915	24.625	36.675	1.12017
2004-05-01	12:00:00	2	1109.5	-200	9.20945	947.5	101	900.5	86	1632	890.75	26	31.9	1.05659
2004-05-01	13:00:00	1.3	961.75	-200	6.07976	815.5	65	1043.75	66	1489.25	627.75	25.575	31.525	1.01842
2004-05-01	14:00:00	1.3	963.25	-200	6.51266	835.25	59	1028.5	68	1495.25	555.75	24.775	34.775	1.07161
2004-05-01	15:00:00	1.8	1050.25	-200	9.2159	947.75	80	928	82	1583.75	651.5	26.125	30.275	1.01015
2004-05-01	16:00:00	2	1053.25	-200	8.27677	910.5	98	948.75	91	1603.25	683	25.475	33.525	1.07667
2004-05-01	17:00:00	1.8	1044.75	-200	8.25215	909.5	89	947.5	95	1597.5	623.75	23.675	37.225	1.07458
2004-05-01	18:00:00	2.4	1123.75	-200	10.9635	1013	114	849.25	104	1675.75	732.75	22.25	38.95	1.03239
2004-05-01	19:00:00	4	1329.75	-200	14.7126	1139.5	195	759.25	131	1780.25	1062.25	20.65	42.8	1.02976
2004-05-01	20:00:00	2.8	1170.75	-200	10.7629	1005.75	156	834.75	112	1673.75	988.25	18.975	51.675	1.12218
2004-05-01	21:00:00	2	1085	-200	9.37767	954	109	866.25	100	1655.5	870.5	17.75	55.5	1.11738
2004-05-01	22:00:00	3.6	1358.25	-200	14.8387	1143.5	184	727	115	1851.25	1242.5	17.4	57.575	1.13422
2004-05-01	23:00:00	3.7	1385	-200	13.3102	1094	190	764.75	129	1768.75	1174.5	17.575	58.475	1.16455
2004-05-02	00:00:00	2.3	1167	-200	8.36936	914.25	105	876	99	1599.25	1125.5	17.225	59.275	1.15506
2004-05-02	01:00:00	1.8	1072	-200	7.86254	893.5	76	892.5	74	1645.5	1118	17.05	60.35	1.16325
2004-05-02	02:00:00	0.9	938.25	-200	5.52416	789.25	38	988.75	55	1535.75	864	16.4	62.175	1.15072
2004-05-02	03:00:00	1.6	999.75	-200	6.57394	838	-200	909.5	-200	1580	942	14.85	67.625	1.13519
2004-05-02	04:00:00	-200	854.25	-200	3.2975	670.25	26	1141.25	35	1460	683.5	14.825	65.8	1.10281
2004-05-02	05:00:00	0.6	814.75	-200	2.63059	628.25	33	1211.75	37	1425.5	689.25	14.65	65.225	1.08112
2004-05-02	06:00:00	0.7	865.5	-200	3.62007	689.25	57	1138.25	45	1456.25	766.5	13.125	70.175	1.05542
2004-05-02	07:00:00	0.8	910.5	-200	4.75559	751	48	1035.75	46	1518	816.5	14.3	66.175	1.07276
2004-05-02	08:00:00	1.2	987.5	-200	5.87607	806	87	951.25	68	1568.25	940.25	15.95	61.6	1.10834
2004-05-02	09:00:00	1.4	1046	-200	6.87263	851.25	94	919.5	77	1595.25	907.75	17.725	56.425	1.13424
2004-05-02	10:00:00	1.6	1084.67	-200	8.4541	917.667	89	890	79	1639	871.333	21.2667	44.6667	1.11567
2004-05-02	11:00:00	1.3	1007.75	-200	6.08516	815.75	78	1015	72	1530.75	689.25	23.575	36.35	1.04308
2004-05-02	12:00:00	1.3	1004.25	-200	6.19904	821	72	1030.75	68	1510	628.5	24.25	33.975	1.01488
2004-05-02	13:00:00	1.1	948	-200	4.81409	754	64	1086	64	1436.25	601.75	24.4	32.725	0.986286
2004-05-02	14:00:00	1.2	1026.25	-200	6.78187	847.25	70	1009.75	73	1518.75	617.25	24.55	31.725	0.964687
2004-05-02	15:00:00	1.5	1046.5	-200	7.0442	858.75	92	947.5	84	1537.75	676.75	23.875	34.3	1.002
2004-05-02	16:00:00	1.1	1017.5	-200	5.53972	790	69	1046.75	67	1443.25	579.75	25.925	28.075	0.925817
2004-05-02	17:00:00	1.9	1159.5	-200	9.46227	957.25	131	883.75	106	1637.25	860.75	24.525	32.325	0.981477
2004-05-02	18:00:00	2.3	1268.5	-200	11.9105	1046.5	144	808.5	114	1720.75	1079.75	22.55	39.275	1.05995
2004-05-02	19:00:00	3.3	1394	-200	13.8118	1110.5	209	736	123	1853.25	1287.5	21.225	47.475	1.18282
2004-05-02	20:00:00	2.6	1291.75	-200	10.6873	1003	170	788.75	108	1753	1163	19.925	54.875	1.26318
2004-05-02	21:00:00	2.2	1211.75	-200	9.69822	966.25	152	840	100	1690.75	1043.25	19.425	52.15	1.16425
2004-05-02	22:00:00	2.3	1137.25	-200	10.1977	985	171	857.75	118	1606.5	1044.75	19.4	42.55	0.948472
2004-05-02	23:00:00	2	1080.25	-200	8.26445	910	153	922.75	121	1547.5	928.75	19.125	44.075	0.966012
2004-05-03	00:00:00	1.6	1030.75	-200	7.09602	861	97	903	94	1533.5	824.5	18.025	49.25	1.0086
2004-05-03	01:00:00	0.8	916.5	-200	3.03589	654.25	37	1169.25	52	1414	545.25	17.625	54.65	1.09176
2004-05-03	02:00:00	0.6	888	-200	2.18708	597.75	26	1228.25	39	1396.75	499.75	16.4	62.1	1.14933
2004-05-03	03:00:00	0.4	871.5	-200	1.73444	563.75	-200	1284	-200	1385	493.5	15.6	65.25	1.14845
2004-05-03	04:00:00	-200	875.5	-200	1.52807	547	25	1256.25	33	1351	504.75	15.95	61.375	1.10429
2004-05-03	05:00:00	0.7	963.75	-200	3.74652	696.5	61	1066.5	57	1515.75	716.75	15.75	64.25	1.14158
2004-05-03	06:00:00	1.3	1146.5	-200	8.17236	906.25	152	815.25	80	1686.75	1126.25	15.95	65.825	1.18436
2004-05-03	07:00:00	3.4	1492.75	-200	21.1287	1327.5	283	577.25	101	2193.25	1596.75	16.825	62.45	1.18694
2004-05-03	08:00:00	4.7	1597	-200	26.4842	1466.25	320	517.75	109	2399.75	1687	16.9	66.05	1.26126
2004-05-03	09:00:00	3.4	1483.25	-200	17.3896	1221.5	318	596.5	109	2054.25	1529	17.375	68.925	1.3557
2004-05-03	10:00:00	2.5	1221.5	-200	12.8833	1079.75	201	741.5	111	1754.75	1366.25	21.35	44.975	1.12905
2004-05-03	11:00:00	2	1060.25	-200	10.8803	1010	135	857.75	102	1623	1074.25	23.925	30.725	0.900243
2004-05-03	12:00:00	1.9	1047.75	-200	10.9635	1013	127	885.75	96	1583.75	940.25	26.75	25.2	0.872133
2004-05-03	13:00:00	1.7	1050.5	-200	10.825	1008	102	911.25	90	1561	920.5	28.425	23.55	0.898276
2004-05-03	14:00:00	1.4	997.5	-200	9.96996	976.5	74	946.75	69	1495.75	695.25	30.325	20.075	0.853926
2004-05-03	15:00:00	1.5	1057.75	-200	11.2426	1023	81	895.5	74	1580	795	30.925	19.65	0.864879
2004-05-03	16:00:00	2.4	1203.25	-200	16.8023	1204	129	790	102	1744.25	1078.5	30.25	20.475	0.867223
2004-05-03	17:00:00	3.9	1491	-200	23.5542	1392	190	629.5	128	2149	1473.25	26.4	34.575	1.17236
2004-05-03	18:00:00	4.2	1467	-200	23.2855	1385	192	622.5	130	2084.25	1492.5	24.95	39.4	1.22676
2004-05-03	19:00:00	3.7	1407.25	-200	19.3705	1278.75	163	659.75	120	2008.5	1308	23.5	43.7	1.24839
2004-05-03	20:00:00	3.2	1323.5	-200	13.0548	1085.5	149	692	113	1902.5	1188.75	19.35	63.125	1.40279
2004-05-03	21:00:00	2	1213.75	-200	9.79065	969.75	119	777	100	1771.25	1075.5	18.75	64.6	1.38356
2004-05-03	22:00:00	1.1	1015.5	-200	5.33892	780.25	61	966.5	70	1565.75	806	19.5	57.1	1.28063
2004-05-03	23:00:00	1.5	1134.5	-200	6.66913	842.25	84	872	83	1652.75	972.75	18.9	62.55	1.35209
2004-05-04	00:00:00	1.3	1064.75	-200	5.5138	788.75	79	936	81	1620.25	929	18.425	65.75	1.38023
2004-05-04	01:00:00	1	999	-200	3.67217	692.25	58	1037.75	69	1588.25	777.5	16.425	79.2	1.46811
2004-05-04	02:00:00	0.6	910.5	-200	2.19757	598.5	32	1189.25	48	1516.75	633.25	16.125	80.05	1.45622
2004-05-04	03:00:00	0.4	872.5	-200	1.49823	544.5	-200	1307.5	-200	1471	497	15.65	81	1.43016
2004-05-04	04:00:00	-200	880.75	-200	1.51909	546.25	21	1334.5	28	1465	457.75	15.55	81.025	1.42162
2004-05-04	05:00:00	0.6	966.5	-200	2.90067	645.75	49	1116.75	47	1552	578.5	15.675	80.5	1.42357
2004-05-04	06:00:00	1.9	1280	-200	9.9433	975.5	180	780	88	1911.75	1002.75	16.025	80.775	1.46021
2004-05-04	07:00:00	4.5	1564.25	-200	23.0372	1378.5	302	551.5	109	2306	1393	16.55	78	1.45722
2004-05-04	08:00:00	4.3	1505.25	-200	22.2522	1357.75	258	555.5	113	2248.25	1406.25	16.125	79.15	1.43985
2004-05-04	09:00:00	3.2	1308.5	-200	16.2072	1186	192	648.5	104	1973	1307.75	17.65	70.825	1.41709
2004-05-04	10:00:00	1.3	1035	-200	7.90476	895.25	84	897.5	65	1656.75	862.5	20.25	54.8	1.28674
2004-05-04	11:00:00	2.2	1147.75	-200	12.3526	1061.75	128	753.25	87	1825	1003.75	21.2	49.325	1.22706
2004-05-04	12:00:00	2.6	1151.75	-200	13.6209	1104.25	145	724.75	99	1859.5	1022.75	21.55	47.925	1.21776
2004-05-04	13:00:00	2.3	1130.5	-200	12.2797	1059.25	132	771.5	100	1784.25	977.75	21.45	47.7	1.20473
2004-05-04	14:00:00	2.4	1141.75	-200	12.1053	1053.25	136	753.25	105	1813.5	979.25	20.35	54	1.27571
2004-05-04	15:00:00	2.6	1197.25	-200	12.9354	1081.5	140	752.75	97	1851.25	970.75	19.95	57.075	1.31583
2004-05-04	16:00:00	1.2	959.5	-200	6.34128	827.5	55	971	54	1564.75	616.5	19.925	55.175	1.27008
2004-05-04	17:00:00	1.6	1077.25	-200	10.6392	1001.25	67	836	59	1764	717.25	19.525	55.7	1.25115
2004-05-04	18:00:00	3.9	1377	-200	20.5808	1312.5	191	611.5	109	2119.5	1219.5	18.35	62.825	1.31273
2004-05-04	19:00:00	4.7	1404.5	-200	22.0648	1352.75	227	602.25	125	2185	1296.25	17.2	68.3	1.32885
2004-05-04	20:00:00	5.4	1484	-200	20.8175	1319	264	590.75	132	2165.5	1413.25	16.1	75.175	1.36539
2004-05-04	21:00:00	3	1186.5	-200	11.7742	1041.75	196	765.5	110	1839.5	1092.5	16.575	70.825	1.32525
2004-05-04	22:00:00	0.9	869.5	-200	4.34062	729.25	43	1096	53	1475	585.5	18.5	56	1.18102
2004-05-04	23:00:00	1.1	931.5	-200	5.02622	764.75	58	1054.25	61	1542.75	574.75	17.325	59.5	1.16668
2004-05-05	00:00:00	0.7	830.25	-200	2.32865	607.75	33	1281.5	41	1369.75	441	18.625	52.325	1.11206
2004-05-05	01:00:00	0.5	778	-200	1.37564	534	14	1479.5	22	1294.25	358.25	19	49.8	1.08313
2004-05-05	02:00:00	0.5	820	-200	1.45296	540.667	18	1449.67	28	1360	377	15.6667	64.5	1.14002
2004-05-05	03:00:00	0.5	841.5	-200	1.75346	565.25	-200	1326.75	-200	1398.75	436.5	15.475	66.95	1.16912
2004-05-05	04:00:00	-200	866.5	-200	2.05952	588.5	28	1266.75	41	1439	468.25	14.675	74.1	1.23017
2004-05-05	05:00:00	0.8	926.5	-200	3.48695	681.5	56	1109	54	1526.25	579.5	14.575	77.15	1.27271
2004-05-05	06:00:00	1.3	1059.75	-200	6.85557	850.5	108	911.5	81	1673.25	804.5	14.5	78.275	1.28514
2004-05-05	07:00:00	3.5	1439.75	-200	19.1059	1271.25	251	630	107	2163	1272.5	15.05	76.825	1.30605
2004-05-05	08:00:00	-200	1448.75	-200	21.9527	1349.75	-200	570.5	-200	2264	1452	16.375	70.825	1.30876
2004-05-05	09:00:00	3.9	1384.25	-200	18.8865	1265	255	619.75	124	2143.25	1307.25	16.375	72.4	1.33786
2004-05-05	10:00:00	2.9	1172.25	-200	13.0249	1084.5	214	737.25	123	1875.75	1102	16.35	68.6	1.26566
2004-05-05	11:00:00	2.6	1142.75	-200	12.9801	1083	190	735	120	1886.5	1082.5	17.2	62.85	1.22282
2004-05-05	12:00:00	3	1167	-200	14.5477	1134.25	182	709	113	1920.25	1082.75	17.425	61.125	1.20603
2004-05-05	13:00:00	3.7	1302.75	-200	19.6902	1287.75	202	618	114	2115.5	1235.75	16.825	66.775	1.26915
2004-05-05	14:00:00	3.9	1263.5	-200	19.3794	1279	224	630.5	120	2049	1222.75	17.3	62.625	1.22605
2004-05-05	15:00:00	3.5	1241.5	-200	16.4458	1193.25	221	683.75	125	1944.5	1174.75	17.475	60.775	1.20286
2004-05-05	16:00:00	2.4	1069.5	-200	11.2216	1022.25	126	823.5	88	1740	933.25	17.5	59.15	1.17251
2004-05-05	17:00:00	1.6	980.75	-200	9.99664	977.5	79	857.25	72	1681.75	834.75	17.675	56.85	1.13924
2004-05-05	18:00:00	3	1198	-200	14.5947	1135.75	137	716.75	103	1870.25	1291.25	17.075	61.5	1.18727
2004-05-05	19:00:00	1.6	999.75	-200	8.46861	918.25	68	881.25	67	1660.5	802.25	17.5	63.9	1.26667
2004-05-05	20:00:00	2.1	1109.5	-200	9.2417	948.75	96	849.5	79	1733	841.5	15.9	70.65	1.26719
2004-05-05	21:00:00	1.8	1023.25	-200	6.93533	854	111	917.75	89	1637.25	743.75	15.1	75.05	1.27991
2004-05-05	22:00:00	1.1	860.75	-200	3.72021	695	56	1130	67	1438	499.5	13.95	72.55	1.1502
2004-05-05	23:00:00	1.5	968.75	-200	4.92707	759.75	81	1059	83	1518.25	559.75	12.025	79.75	1.11749
2004-05-06	00:00:00	1.4	897.75	-200	4.55802	740.75	79	1085	76	1467.5	588.5	12.475	75.825	1.09377
2004-05-06	01:00:00	0.9	834.75	-200	3.36435	674.25	46	1201	58	1416	487.5	12	75.05	1.04994
2004-05-06	02:00:00	0.5	765.75	-200	1.24654	522.5	19	1533.5	30	1310	387	12.6	72.225	1.05025
2004-05-06	03:00:00	0.4	742.5	-200	1.03	502	-200	1634.5	-200	1291.5	354.5	12.7	71.65	1.04861
2004-05-06	04:00:00	-200	758.25	-200	1.18672	517	15	1625	22	1294	350.75	13.1	67.125	1.00794
2004-05-06	05:00:00	0.6	804	-200	2.27512	604	48	1365.75	50	1357.25	419.5	13.225	64.575	0.977441
2004-05-06	06:00:00	1.3	948	-200	6.11761	817.25	128	1048.25	92	1545.5	695	13.05	65.575	0.981511
2004-05-06	07:00:00	2.9	1204	-200	16.819	1204.5	193	728.5	101	1983.5	1138.75	14.65	58.45	0.968821
2004-05-06	08:00:00	3.6	1230.75	-200	20.2821	1304.25	203	652.25	121	2029	1314.75	15.9	53.125	0.952857
2004-05-06	09:00:00	3.4	1175.75	-200	16.3634	1190.75	220	704.5	130	1836.25	1216.5	17.925	46.125	0.938765
2004-05-06	10:00:00	2.5	1042.5	-200	12.4844	1066.25	161	788.75	114	1691.75	1014.25	20.225	37.675	0.883285
2004-05-06	11:00:00	2.1	992.25	-200	9.79726	970	135	869.25	100	1624	883.75	18.5	42.8	0.902635
2004-05-06	12:00:00	1.1	884.5	-200	5.17652	772.25	57	1035.25	56	1450	523.5	13	64.25	0.9586
2004-05-06	13:00:00	1.8	990.75	-200	8.9341	936.75	91	874.25	75	1580.5	644	15.125	54.5	0.930921
2004-05-06	14:00:00	3	1181.5	-200	14.0656	1118.75	219	732.75	121	1831.25	1032.25	13.65	65.475	1.01837
2004-05-06	15:00:00	3.1	1190.75	-200	12.7201	1074.25	239	740.75	128	1816	1037.75	12.275	78.325	1.11537
2004-05-06	16:00:00	3.6	1271.5	-200	14.6026	1136	209	729.5	139	1868.5	1076.5	12.7	74.225	1.0863
2004-05-06	17:00:00	3.3	1137.75	-200	12.3892	1063	169	803.75	122	1727.5	982.5	14.425	64.2	1.04904
2004-05-06	18:00:00	1.8	1008.25	-200	9.36469	953.5	92	891.75	92	1625.5	833.75	15.6	58.325	1.02656
2004-05-06	19:00:00	2.1	1074.75	-200	11.0051	1014.5	107	823.75	97	1721.75	949	14.975	61.375	1.03846
2004-05-06	20:00:00	2.2	1033.75	-200	8.87692	934.5	122	869.5	98	1605.25	941.25	13.675	65.825	1.02544
2004-05-06	21:00:00	1.6	933.75	-200	6.62987	840.5	100	972.75	93	1497	756	12.25	66.4	0.944033
2004-05-06	22:00:00	0.9	883.25	-200	3.89713	705	51	1133	65	1421.5	654.5	15.4	58.775	1.02153
2004-05-06	23:00:00	1.8	1021.25	-200	7.32246	870.75	93	938	81	1586	804.5	14.125	64.9	1.04045
2004-05-07	00:00:00	2.3	1058.75	-200	8.19074	907	145	878.5	102	1579	969.5	13.8	64.75	1.01677
2004-05-07	01:00:00	2	1023.25	-200	7.48099	877.5	106	895.75	91	1567.75	969	13.475	67.75	1.04203
2004-05-07	02:00:00	0.9	855.25	-200	3.28088	669.25	46	1160	56	1427	670.75	13.65	69.4	1.07941
2004-05-07	03:00:00	0.6	825.5	-200	2.44095	615.5	-200	1227.25	-200	1383.5	575	13.925	67.675	1.07121
2004-05-07	04:00:00	-200	831	-200	2.24679	602	32	1269	41	1385.75	535.25	14	67.825	1.07872
2004-05-07	05:00:00	0.7	817	-200	2.79516	639	51	1259.5	48	1363.75	488.75	14.575	61.075	1.00753
2004-05-07	06:00:00	1.5	972	-200	7.52824	879.5	89	963.5	72	1589.5	688.75	14.35	60.55	0.9847
2004-05-07	07:00:00	3.7	1199.75	-200	19.7794	1290.25	214	656.75	106	2013.75	1196	14.9	56.9	0.958184
2004-05-07	08:00:00	4.2	1233.75	-200	22.1397	1354.75	196	620.75	107	2095	1265.5	16.4	50.175	0.928626
2004-05-07	09:00:00	3.4	1164	-200	14.9733	1147.75	224	741	127	1824.25	1129.5	16.05	50.875	0.92114
2004-05-07	10:00:00	2.4	975.75	-200	9.33225	952.25	174	877.75	114	1582	833.5	18.625	42.775	0.909093
2004-05-07	11:00:00	1.3	843.5	-200	6.28641	825	90	1026.5	101	1405	536.25	19.7	33.675	0.764573
2004-05-07	12:00:00	1.5	850.5	-200	8.15399	905.5	89	988.5	95	1417.75	544.75	21.15	27.675	0.686386
2004-05-07	13:00:00	2.2	926	-200	10.8734	1009.75	132	904.25	110	1525.75	720.25	19.65	28.475	0.644533
2004-05-07	14:00:00	1.8	890.25	-200	9.274	950	114	940.25	101	1459.75	655.25	19.775	29.725	0.677996
2004-05-07	15:00:00	1.9	920.75	-200	8.35699	913.75	107	936.75	106	1480.75	613.75	19.225	35.625	0.785622
2004-05-07	16:00:00	2.3	1052.25	-200	9.4362	956.25	140	868.5	116	1600	725.25	14.225	60.525	0.976504
2004-05-07	17:00:00	3.6	1246.67	-200	17.9397	1237.67	187	691.333	124	1947.67	1036	12.9	69.1333	1.02486
2004-05-07	18:00:00	4.3	1205	-200	17.4149	1222.25	222	683.5	133	1911	1127.25	12.675	70.45	1.0294
2004-05-07	19:00:00	2.2	1016.25	-200	10.4617	994.75	117	857.25	96	1641.5	853.75	13.9	62.675	0.990486
2004-05-07	20:00:00	1.5	983.5	-200	7.52233	879.25	89	939.5	85	1527.25	792.25	13.9	62.95	0.994831
2004-05-07	21:00:00	2	1041	-200	7.97736	898.25	130	921.75	97	1594.5	890.5	13.425	65.2	0.999613
2004-05-07	22:00:00	2	1027	-200	7.71253	887.25	133	926.5	97	1568.25	875.75	13.35	64.65	0.986437
2004-05-07	23:00:00	2.1	1025.25	-200	7.28742	869.25	144	954.25	101	1530.75	851	13.3	63.625	0.967697
2004-05-08	00:00:00	1.5	983.75	-200	6.3743	829	99	1003.25	85	1515.75	786.5	13.35	61.825	0.943333
2004-05-08	01:00:00	2.2	969.25	-200	5.5605	791	102	1084.25	80	1445.5	711	13.625	59.7	0.927063
2004-05-08	02:00:00	0.5	757.75	-200	1.51013	545.5	27	1482.5	33	1252	396	14.6	53.3	0.880662
2004-05-08	03:00:00	-200	766.75	-200	1.53107	547.25	-200	1481.75	-200	1239	374.75	14.35	51.725	0.841183
2004-05-08	04:00:00	-200	771.75	-200	1.2002	518.25	-200	1543.5	-200	1202.25	343.25	10.875	67.55	0.878532
2004-05-08	05:00:00	-200	831.25	-200	1.64375	556.5	-200	1480.25	-200	1257	400.5	7.4	85.15	0.880752
2004-05-08	06:00:00	-200	871	-200	2.62682	628	-200	1242.5	-200	1328.75	518.25	8.7	81.5	0.919017
2004-05-08	07:00:00	-200	994.5	-200	5.91871	808	-200	1027.5	-200	1479.25	685.25	10.275	75.625	0.945798
2004-05-08	08:00:00	-200	1093	-200	8.46861	918.25	-200	857.25	-200	1588.5	939	10.975	75.025	0.98212
2004-05-08	09:00:00	-200	1078.75	-200	7.65288	884.75	-200	883.75	-200	1588.25	973.75	13.575	66.125	1.02356
2004-05-08	10:00:00	-200	1083.75	-200	6.87832	851.5	-200	910	-200	1574.5	959	14.7	63.075	1.0488
2004-05-08	11:00:00	-200	1203.75	-200	10.1238	982.25	-200	791	-200	1739.25	1067.25	13.8	72.35	1.13612
2004-05-08	12:00:00	-200	1212.75	-200	11.0887	1017.5	-200	760.25	-200	1777.75	1060.75	13.325	76.825	1.17033
2004-05-08	13:00:00	-200	1123.5	-200	9.2417	948.75	-200	827.25	-200	1671	1008	16.15	60.025	1.09365
2004-05-08	14:00:00	-200	945	-200	4.28	726	-200	1053	-200	1432.25	637	16.275	55.25	1.01457
2004-05-08	15:00:00	-200	964	-200	6.46825	833.25	-200	1002.5	-200	1489.25	647	20	40.45	0.935405
2004-05-08	16:00:00	-200	903.25	-200	5.44665	785.5	-200	1073	-200	1374.5	523	19.825	35.4	0.809911
2004-05-08	17:00:00	-200	918.25	-200	7.14801	863.25	-200	992	-200	1408	538.75	19.8	33.575	0.766983
2004-05-08	18:00:00	-200	1027.5	-200	9.54719	960.5	-200	913	-200	1501.75	648.5	17.775	38.5	0.776321
2004-05-08	19:00:00	-200	1174.75	-200	16.9609	1208.75	-200	719.5	-200	1828.75	1070.5	16.675	44.575	0.839303
2004-05-08	20:00:00	-200	1215.25	-200	15.388	1160.75	-200	713.5	-200	1801.5	1237	15.075	51.775	0.881585
2004-05-08	21:00:00	-200	1072	-200	9.94996	975.75	-200	835.25	-200	1602.75	1017.5	14.15	56.225	0.902811
2004-05-08	22:00:00	-200	1070	-200	9.32577	952	-200	857.5	-200	1572.5	966.25	13.8	58.25	0.914705
2004-05-08	23:00:00	-200	1020.75	-200	6.91821	853.25	-200	979	-200	1456.75	900.5	13.65	59.7	0.928544
2004-05-09	00:00:00	-200	1063	-200	7.0557	859.25	-200	951.75	-200	1518.5	949	13.7	60.275	0.940484
2004-05-09	01:00:00	-200	1068	-200	8.95319	937.5	-200	861.5	-200	1574.75	1057	12.725	64.85	0.95062
2004-05-09	02:00:00	-200	992.5	-200	8.32609	912.5	-200	879.25	-200	1601.25	989.25	12.625	65.425	0.952904
2004-05-09	03:00:00	-200	1034.25	-200	8.71891	928.25	-200	847.75	-200	1618.5	1004.75	12.075	68.575	0.964011
2004-05-09	04:00:00	-200	1024.75	-200	8.36936	914.25	-200	855.75	-200	1605	1003	12.325	68.05	0.97218
2004-05-09	05:00:00	-200	1036.25	-200	8.07461	902.25	-200	824.75	-200	1558.25	1086.5	11.925	71.1	0.98987
2004-05-09	06:00:00	-200	924.25	-200	5.21692	774.25	-200	987.25	-200	1460.25	909	11.275	73.775	0.984769
2004-05-09	07:00:00	-200	921.5	-200	4.49137	737.25	-200	1050.25	-200	1413.75	881.5	13.125	62.625	0.941873
2004-05-09	08:00:00	-200	830.25	-200	2.57793	624.75	-200	1265.75	-200	1303.25	568	16.8	46.8	0.888108
2004-05-09	09:00:00	-200	946.75	-200	4.76532	751.5	-200	1067.75	-200	1434.25	620.25	17.9	44.8	0.910386
2004-05-09	10:00:00	-200	976.75	-200	4.48189	736.75	-200	1025	-200	1449.75	685.5	17.775	49.525	0.998632
2004-05-09	11:00:00	-200	1024.5	-200	4.94683	760.75	-200	1008	-200	1476	700.25	18.8	46.4	0.996831
2004-05-09	12:00:00	-200	1039.5	-200	5.83357	804	-200	939.5	-200	1501.5	779.75	19.35	44.025	0.978345
2004-05-09	13:00:00	-200	1012.5	-200	4.13692	718.25	-200	1040.5	-200	1491.5	558	14.75	68.375	1.14054
2004-05-09	14:00:00	-200	1035	-200	4.82387	754.5	-200	996.75	-200	1520.5	608	15.6	65.775	1.15769
2004-05-09	15:00:00	-200	1086.25	-200	7.0442	858.75	-200	891.75	-200	1595	754.25	17.675	54.025	1.08263
2004-05-09	16:00:00	-200	967	-200	4.78968	752.75	-200	1047.75	-200	1420	543.5	17.85	46.725	0.946565
2004-05-09	17:00:00	-200	968	-200	5.4312	784.75	-200	1010.5	-200	1445.5	550	17.8	44.4	0.89668
2004-05-09	18:00:00	-200	1003.5	-200	6.31931	826.5	-200	971.5	-200	1465	626.5	17.75	44.35	0.892896
2004-05-09	19:00:00	-200	1131.75	-200	10.097	981.25	-200	850.25	-200	1613.5	876.75	16.425	47.75	0.88513
2004-05-09	20:00:00	-200	1121	-200	10.1977	985	-200	833.25	-200	1625	981.25	15.575	51.575	0.90633
2004-05-09	21:00:00	-200	1067.5	-200	8.43754	917	-200	889.25	-200	1569.5	832.25	14.85	54.975	0.922842
2004-05-09	22:00:00	-200	1123	-200	8.94046	937	-200	866.25	-200	1606	940.5	13.825	59.75	0.939756
2004-05-09	23:00:00	-200	1101	-200	8.84522	933.25	-200	844.5	-200	1600.25	1021.75	13.75	62.1	0.972056
2004-05-10	00:00:00	-200	996.75	-200	6.49599	834.5	-200	950.5	-200	1500.75	887.5	13.9	61.1	0.965595
2004-05-10	01:00:00	-200	875	-200	3.02786	653.75	-200	1171.5	-200	1375.25	682.75	14.875	57.6	0.968438
2004-05-10	02:00:00	-200	815.25	-200	1.79498	568.5	-200	1360.75	-200	1343.5	533.75	14.375	60.15	0.97975
2004-05-10	03:00:00	-200	802.75	-200	1.34428	531.25	-200	1462	-200	1317.5	488.75	13.85	63.175	0.99521
2004-05-10	04:00:00	-200	828.5	-200	1.8175	570.25	-200	1304.25	-200	1356.5	561.75	14.2	62.925	1.01361
2004-05-10	05:00:00	-200	867	-200	2.57793	624.75	-200	1212.5	-200	1385	652.25	14.025	63.825	1.01672
2004-05-10	06:00:00	-200	1118	-200	9.79065	969.75	-200	837.25	-200	1705	1018.75	13.35	67.45	1.02916
2004-05-10	07:00:00	-200	1631.5	-200	31.5472	1586.75	-200	522.5	-200	2458.5	1677.5	14.7	62.25	1.03508
2004-05-10	08:00:00	-200	1597.67	-200	35.1873	1668.33	-200	490.333	-200	2617	1749.33	16	57.3	1.03422
2004-05-10	09:00:00	4.4	1377.75	-200	20.2189	1302.5	257	633.25	117	2050.5	1494.25	17.85	51.15	1.03621
2004-05-10	10:00:00	2.5	1131.5	-200	13.363	1095.75	178	731.25	107	1807.5	1186.25	19.975	44.95	1.03788
2004-05-10	11:00:00	2.1	1108.25	-200	11.7241	1040	145	767	95	1748	1051	20.3	44.125	1.03925
2004-05-10	12:00:00	2.4	1131	-200	13.3857	1096.5	137	735.25	93	1797.25	1026.75	20.725	42.4	1.0248
2004-05-10	13:00:00	2.2	1105	-200	12.8982	1080.25	139	750.75	104	1758.25	981	20.85	40.6	0.98878
2004-05-10	14:00:00	2.2	1120	-200	13.3554	1095.5	130	753.25	102	1767.25	975.5	21.475	39.7	1.0042
2004-05-10	15:00:00	2.3	1100.25	-200	13.7353	1108	148	799.75	109	1731	931.75	24.975	30.125	0.939362
2004-05-10	16:00:00	2.1	1098	-200	14.2204	1123.75	120	810	97	1715.75	871.25	25.175	29.7	0.937111
2004-05-10	17:00:00	2.5	1136.5	-200	17.8058	1233.75	132	749	104	1824.25	989.75	23.45	31.95	0.910006
2004-05-10	18:00:00	3.6	1266.75	-200	22.0461	1352.25	188	650.75	124	1960.5	1196.25	21.025	37.775	0.929807
2004-05-10	19:00:00	4	1318.75	-200	24.3777	1413.25	204	596.75	135	2050	1329	19.225	45.725	1.00835
2004-05-10	20:00:00	3	1160.25	-200	16.314	1189.25	167	698.25	122	1824.25	1150.5	17.725	50.9	1.02318
2004-05-10	21:00:00	2.1	1083.5	-200	12.3892	1063	128	775.25	109	1702.5	1031	16.8	53.575	1.01667
2004-05-10	22:00:00	1.7	1024.5	-200	9.60617	962.75	106	841.75	95	1620.75	917.25	15.825	56.2	1.00327
2004-05-10	23:00:00	1.1	953.25	-200	6.39635	830	88	985.75	86	1520.5	860	15.95	56.5	1.01658
2004-05-11	00:00:00	0.9	959.25	-200	5.99901	811.75	77	961	78	1518	910	14.225	64.125	1.03459
2004-05-11	01:00:00	0.4	833.5	-200	2.76808	637.25	36	1187	53	1362	698.5	15.025	59.75	1.01417
2004-05-11	02:00:00	0.2	786.75	-200	1.55212	549	28	1365.75	43	1317.25	596.25	14.3	61.875	1.00306
2004-05-11	03:00:00	0.2	799	-200	1.62524	555	-200	1326.5	-200	1319.5	642.75	12.75	66	0.969033
2004-05-11	04:00:00	-200	807.25	-200	1.83043	571.25	46	1305.25	53	1334.75	704.25	11.4	70.475	0.948381
2004-05-11	05:00:00	0.6	866.25	-200	3.56829	686.25	55	1134.75	48	1404.5	740.75	12.05	68.025	0.954737
2004-05-11	06:00:00	1.4	1034.5	-200	8.43133	916.75	135	881.5	64	1606	967.5	11.35	70.4	0.944304
2004-05-11	07:00:00	4.6	1469.25	-200	27.4932	1491	327	555	95	2301	1560.75	12.725	65.625	0.961981
2004-05-11	08:00:00	5.5	1553.25	-200	31.0154	1574.5	383	507.5	120	2422.75	1779	14.45	59.85	0.979518
2004-05-11	09:00:00	4.8	1513	-200	26.0308	1455	366	554	153	2182	1821.75	17.525	49.75	0.987715
2004-05-11	10:00:00	4.5	1395.25	-200	22.6385	1368	322	605	163	2032.25	1675	21.875	35.225	0.912799
2004-05-11	11:00:00	3	1208.75	-200	18.2952	1248	188	711.75	119	1891	1295.25	23.5	29.525	0.84345
2004-05-11	12:00:00	2.5	1141.5	-200	13.95	1115	144	775.75	96	1734.75	1090.75	24.325	29.75	0.892643
2004-05-11	13:00:00	2.3	1139.75	-200	14.3758	1128.75	132	765.25	94	1727.5	1023.25	23.8	31.675	0.921198
2004-05-11	14:00:00	2	1105.25	-200	11.5674	1034.5	117	826	86	1643	877	24.15	31.175	0.92573
2004-05-11	15:00:00	1.9	1131	-200	12.2433	1058	121	823.5	91	1663.75	930.5	26.525	27.175	0.928202
2004-05-11	16:00:00	1.9	1161.5	-200	12.4184	1064	124	832	97	1675.25	912.75	25.725	28.375	0.92478
2004-05-11	17:00:00	3.5	1335.75	-200	21.0736	1326	188	673.75	125	1922.5	1254.75	26.35	27.525	0.930579
2004-05-11	18:00:00	4.6	1532.75	-200	29.9312	1549.25	226	573	140	2233.25	1570.75	24.45	31.575	0.954452
2004-05-11	19:00:00	6.3	1650	-200	34.3094	1649	266	528.25	158	2344.5	1779	23.075	35.35	0.98453
2004-05-11	20:00:00	5	1535	-200	26.1413	1457.75	269	568	159	2120.25	1735	21.15	40.2	0.997027
2004-05-11	21:00:00	3.3	1381.75	-200	18.1056	1242.5	183	631.5	128	1941	1511	19.2	52.3	1.15158
2004-05-11	22:00:00	2.7	1334.75	-200	14.1661	1122	167	673.25	114	1839.75	1424.25	18.1	58.675	1.20721
2004-05-11	23:00:00	2.2	1267	-200	12.4258	1064.25	138	706.25	100	1765.5	1348	17.275	58.8	1.14938
2004-05-12	00:00:00	1.7	1121.5	-200	8.65604	925.75	105	804.75	88	1618.75	1173.75	16.925	58.825	1.12505
2004-05-12	01:00:00	0.8	986.25	-200	5.15134	771	54	964.25	67	1518	946.5	17.6	57.575	1.14841
2004-05-12	02:00:00	0.8	966	-200	4.61547	743.75	58	967	65	1510.5	935	15.65	63.925	1.12868
2004-05-12	03:00:00	0.6	918.5	-200	3.14106	660.75	-200	1089.25	-200	1467.75	837.5	14.925	65.65	1.10728
2004-05-12	04:00:00	-200	872	-200	2.68752	632	37	1132.25	47	1402.75	768	15.625	62.175	1.09605
2004-05-12	05:00:00	0.8	967	-200	4.71191	748.75	84	995.5	57	1517	880.5	14.025	68.325	1.08841
2004-05-12	06:00:00	1.5	1151.75	-200	9.64557	964.25	134	799.75	73	1705.25	1095.5	14.525	65.7	1.08039
2004-05-12	07:00:00	4.1	1500.25	-200	23.6023	1393.25	279	559.5	95	2163	1495	15.5	62.175	1.08745
2004-05-12	08:00:00	5.9	1754	-200	37.3803	1715.75	333	451.5	110	2666.5	1894.75	17	56.775	1.09093
2004-05-12	09:00:00	5.1	1558	-200	26.5752	1468.5	336	524.5	121	2281	1758.25	18.825	52.45	1.12854
2004-05-12	10:00:00	3.9	1446	-200	21.9527	1349.75	280	567.75	108	2140	1630.25	19.725	51.875	1.1796
2004-05-12	11:00:00	3.4	1349	-200	17.8656	1235.5	275	627.25	125	1963.75	1530.25	20.875	44.575	1.08724
2004-05-12	12:00:00	3.3	1452	-200	22.7332	1370.5	207	576	117	2138.25	1622.25	21.95	43.275	1.12649
2004-05-12	13:00:00	5.1	1675.5	-200	29.2739	1533.75	305	495.5	131	2412.5	1827.5	20.4	55.725	1.32048
2004-05-12	14:00:00	3.1	1327.25	-200	14.6811	1138.5	236	657.5	126	1893.75	1322.75	17.45	67.05	1.32499
2004-05-12	15:00:00	2.5	1247.75	-200	12.6389	1071.5	183	712.75	114	1797	1187.5	17.15	64	1.24132
2004-05-12	16:00:00	2.4	1249.5	-200	12.7127	1074	162	724.25	123	1806.25	1166.25	17.3	61.075	1.1957
2004-05-12	17:00:00	2.8	1221.75	-200	13.01	1084	157	726.75	116	1797.25	1108	17.7	56.3	1.12997
2004-05-12	18:00:00	2.9	1159	-200	13.4008	1097	136	747.5	107	1709.25	995	17.375	48.6	0.955925
2004-05-12	19:00:00	3.4	1191.5	-200	14.815	1142.75	166	740.25	123	1766.75	1107.75	17.575	43.675	0.869803
2004-05-12	20:00:00	2.2	1074.25	-200	9.37767	954	136	846	112	1569.5	956.25	16.725	47.225	0.891983
2004-05-12	21:00:00	1.6	984	-200	6.86694	851	112	959.25	101	1452	817	16.75	45.65	0.863583
2004-05-12	22:00:00	1.3	970.25	-200	5.1967	773.25	87	1025.75	91	1425.25	657.75	16.125	52	0.945952
2004-05-12	23:00:00	1.3	987.333	-200	5.74192	799.667	86	988.667	88	1462	658	15.4667	57.0667	0.996012
2004-05-13	00:00:00	1.6	1003	-200	6.53492	836.25	98	948.5	96	1455.25	747.5	16.175	50.175	0.915621
2004-05-13	01:00:00	1.2	933	-200	4.68289	747.25	62	1045	75	1405	568.5	16.45	50.525	0.938037
2004-05-13	02:00:00	0.6	859	-200	2.51089	620.25	32	1200.5	47	1315.5	445	16.175	52.75	0.962611
2004-05-13	03:00:00	0.4	814.5	-200	1.42182	538	-200	1412.25	-200	1272.25	379.25	16.05	53.7	0.972289
2004-05-13	04:00:00	-200	792	-200	1.02241	501.25	21	1553.75	25	1252	353.75	16.175	53	0.967173
2004-05-13	05:00:00	0.4	835	-200	1.68414	559.75	41	1409	49	1317	406.5	16.175	53.7	0.979947
2004-05-13	06:00:00	1	974.5	-200	4.46294	735.75	86	1069.25	85	1459	611.25	15.9	55.25	0.990971
2004-05-13	07:00:00	2	1132.5	-200	9.44272	956.5	174	815.25	106	1651.75	943.75	16.175	55.625	1.01508
2004-05-13	08:00:00	3.6	1347.25	-200	17.8998	1236.5	264	645.25	136	1984.25	1328.25	16.025	59.25	1.07109
2004-05-13	09:00:00	2.4	1121.75	-200	10.5982	999.75	211	782.5	119	1663.25	1084.5	16.6	55.6	1.04199
2004-05-13	10:00:00	2.4	1151.75	-200	10.9912	1014	208	773.75	122	1714.25	1139.25	17.425	51.8	1.02204
2004-05-13	11:00:00	1.6	1020.25	-200	7.21757	866.25	139	906.5	90	1553.5	798.5	17.65	49.7	0.994415
2004-05-13	12:00:00	1.9	1065.5	-200	8.69374	927.25	138	846.25	97	1608.25	804	17.15	52.775	1.0236
2004-05-13	13:00:00	2.4	1105	-200	11.0539	1016.25	142	789.25	98	1735.5	930.25	18.2	49.6	1.02683
2004-05-13	14:00:00	1.7	1056	-200	7.87459	894	131	891	93	1575.5	770.5	19.525	45.025	1.01137
2004-05-13	15:00:00	2.1	1083.75	-200	9.79065	969.75	132	817.75	98	1626	845.25	19.475	45.5	1.01891
2004-05-13	16:00:00	3.1	1287.75	-200	16.3716	1191	178	691.25	123	1910.25	1192	19.775	44.3	1.01044
2004-05-13	17:00:00	4.6	1389.75	-200	22.648	1368.25	228	605	148	2091.75	1493.5	20.25	43.075	1.01143
2004-05-13	18:00:00	4.5	1374	-200	20.246	1303.25	232	635.75	148	2035.5	1457	20.3	44.4	1.04572
2004-05-13	19:00:00	3.9	1377.75	-200	21.6549	1341.75	204	611.5	133	2075.75	1488.5	19.775	47.875	1.09198
2004-05-13	20:00:00	4.6	1428.25	-200	21.193	1329.25	250	593.75	141	2101.75	1601.5	19.15	52.325	1.14859
2004-05-13	21:00:00	3.3	1335.5	-200	15.8644	1175.5	208	655.5	131	1890.5	1467.75	18.225	54.675	1.13364
2004-05-13	22:00:00	2.7	1233.5	-200	11.9681	1048.5	158	746.25	121	1733.25	1273.5	17.8	54.95	1.10974
2004-05-13	23:00:00	3.3	1300	-200	17.3811	1221.25	197	648.25	123	1945.75	1401	17.5	56.375	1.11751
2004-05-14	00:00:00	2.5	1246.25	-200	15.0288	1149.5	152	653.5	107	1873	1353.5	17.275	57.8	1.12983
2004-05-14	01:00:00	2.1	1140.5	-200	11.0678	1016.75	112	740.25	104	1690	1188.25	16.8	57.5	1.09116
2004-05-14	02:00:00	1.3	1014.25	-200	6.91821	853.25	75	882.5	91	1538	974.75	16.3	57	1.04835
2004-05-14	03:00:00	1	938.25	-200	5.10615	768.75	-200	978	-200	1462.75	816.25	16.15	56.325	1.02624
2004-05-14	04:00:00	-200	988.25	-200	6.05279	814.25	74	908.25	87	1512	920.5	15.525	59.925	1.04975
2004-05-14	05:00:00	1.2	983.25	-200	6.45163	832.5	116	894.25	102	1523.5	1012.25	15.95	58.25	1.04807
2004-05-14	06:00:00	1.5	1033	-200	8.43754	917	118	882.25	95	1616.75	905.25	17.175	52.35	1.01694
2004-05-14	07:00:00	3.7	1387.5	-200	22.7806	1371.75	272	601	140	2105.25	1448.75	18.475	49.375	1.03969
2004-05-14	08:00:00	-200	1512.25	-200	29.1158	1530	-200	526.75	-200	2325.75	1725.25	19.95	45.65	1.05243
2004-05-14	09:00:00	3.3	1147.75	-200	13.6056	1103.75	258	723	138	1712.75	1301	20.975	37.95	0.931284
2004-05-14	10:00:00	2.5	1095.25	-200	11.1236	1018.75	186	814.5	113	1618.25	1180.75	22.775	32.425	0.886981
2004-05-14	11:00:00	1.9	986.5	-200	10.0367	979	130	922.75	101	1514.75	961.75	25.5	25.55	0.821759
2004-05-14	12:00:00	2	984	-200	10.5366	997.5	134	905.25	97	1523.25	862.25	25.9	23.6	0.777105
2004-05-14	13:00:00	2.5	1072	-200	13.0175	1084.25	148	843	114	1621.5	1017	27.7	20.775	0.759865
2004-05-14	14:00:00	2.1	1047.5	-200	12.5211	1067.5	147	869.25	110	1572.75	993.25	27.075	21.6	0.761848
2004-05-14	15:00:00	2.1	1041.5	-200	11.3975	1028.5	123	906.75	103	1540.25	879.25	28.45	20.15	0.769699
2004-05-14	16:00:00	2.3	1113	-200	13.0623	1085.75	138	881.75	119	1584	925.5	28.05	21.925	0.818358
2004-05-14	17:00:00	3	1145.5	-200	14.8703	1144.5	162	836.25	126	1647	1010.5	27.575	22.35	0.811562
2004-05-14	18:00:00	4.1	1238.75	-200	19.1323	1272	214	748	144	1790.25	1380.25	25.2	24.275	0.767069
2004-05-14	19:00:00	4.5	1302	-200	21.7943	1345.5	230	706.25	164	1879.5	1698.25	24.575	25.075	0.763606
2004-05-14	20:00:00	3.5	1181.25	-200	16.109	1183	191	792.25	148	1711.25	1432.25	23.075	27.2	0.757545
2004-05-14	21:00:00	2.1	1067.5	-200	11.6385	1037	128	869.25	119	1566.75	1217	22.05	28.575	0.74833
2004-05-14	22:00:00	2.3	1135	-200	12.4331	1064.5	138	802.5	111	1630	1317.25	20.8	34.45	0.836456
2004-05-14	23:00:00	1.9	1121.25	-200	10.3869	992	126	844.25	115	1504.5	1254.5	20.375	35.3	0.835208
2004-05-15	00:00:00	1.9	1131	-200	9.65215	964.5	107	842.75	103	1519.75	1223.25	19.1	38.3	0.838149
2004-05-15	01:00:00	1.2	947	-200	5.69633	797.5	67	964.25	81	1395.25	930	18	40.45	0.827099
2004-05-15	02:00:00	1	935	-200	5.44665	785.5	55	963.75	71	1389.25	953.75	17.425	43.35	0.855318
2004-05-15	03:00:00	1.1	941	-200	5.58651	792.25	-200	975.25	-200	1396.75	888.75	14.825	50.65	0.848895
2004-05-15	04:00:00	-200	867.25	-200	4.42043	733.5	48	1043	58	1324.25	808	14.6	51.375	0.848856
2004-05-15	05:00:00	0.5	838.5	-200	2.77194	637.5	33	1170.75	44	1271.25	643.25	15.725	46.95	0.832884
2004-05-15	06:00:00	0.6	872.5	-200	3.87928	704	41	1090.5	49	1322.25	756	15.25	49.675	0.855231
2004-05-15	07:00:00	1.4	1064.75	-200	9.06173	941.75	106	889.5	68	1575.75	1066.75	16.025	47.375	0.856424
2004-05-15	08:00:00	2.6	1186.5	-200	13.598	1103.5	208	726.5	108	1720.5	1390.75	17.6	43.35	0.864672
2004-05-15	09:00:00	2.8	1249.25	-200	15.8156	1174	193	711.5	117	1773.5	1486	20.275	37.45	0.880692
2004-05-15	10:00:00	2.6	1156.5	-200	12.661	1072.25	191	802.25	127	1652.5	1327.25	23.075	30.25	0.84249
2004-05-15	11:00:00	1.6	988.25	-200	8.61215	924	113	1015.25	93	1462.75	835.25	25.025	24.2	0.75684
2004-05-15	12:00:00	1.7	1024.75	-200	9.39716	954.75	111	997.25	94	1456.5	833.75	25.6	23.525	0.761096
2004-05-15	13:00:00	1.7	996.75	-200	9.19013	946.75	106	997.75	87	1459.5	815	25.525	22.625	0.728755
2004-05-15	14:00:00	1.3	916.25	-200	6.3743	829	82	1123.5	75	1332.75	621	26.125	21.05	0.70235
2004-05-15	15:00:00	1.4	965	-200	8.27266	910.333	79	1055.67	81	1389	643.333	28.1667	19.4333	0.730269
2004-05-15	16:00:00	1.4	984.5	-200	8.08071	902.5	90	1059.25	86	1436.5	711.5	27.425	20.5	0.737927
2004-05-15	17:00:00	1.7	1026	-200	8.51842	920.25	104	1037	97	1454.5	745.75	26.05	22.675	0.753249
2004-05-15	18:00:00	2.3	1125.25	-200	11.0469	1016	148	910.25	117	1563.5	990.75	23.75	27.1	0.7858
2004-05-15	19:00:00	2.5	1159	-200	12.1126	1053.5	158	877.75	120	1603	1046	23.025	28.725	0.797627
2004-05-15	20:00:00	3.3	1283.5	-200	15.0129	1149	234	779.75	149	1725	1303.75	21.75	31.85	0.819138
2004-05-15	21:00:00	2.2	1101	-200	10.2314	986.25	163	852.25	124	1573.5	1099.5	20.875	33.2	0.809788
2004-05-15	22:00:00	1.6	1101	-200	9.8569	972.25	95	878.5	97	1551.75	1001.25	20.15	34.35	0.801653
2004-05-15	23:00:00	2.6	1182.5	-200	11.9897	1049.25	146	761.75	112	1594.25	1290.25	19.575	36.95	0.83253
2004-05-16	00:00:00	2.3	1132.25	-200	10.4957	996	102	822	95	1563.75	1205	18.15	40.9	0.844104
2004-05-16	01:00:00	1.5	998.25	-200	7.0557	859.25	90	919.25	88	1449.75	1044.75	17.05	43.275	0.834129
2004-05-16	02:00:00	0.9	910.5	-200	4.60108	743	41	1051.75	54	1369.75	739.25	16.725	43.375	0.819265
2004-05-16	03:00:00	0.8	874.5	-200	4.17825	720.5	-200	1082.75	-200	1327.5	683.25	15.875	44.725	0.800934
2004-05-16	04:00:00	-200	807.75	-200	2.64951	629.5	30	1233.5	43	1256.25	573	15.225	45.55	0.782976
2004-05-16	05:00:00	0.4	792	-200	2.20808	599.25	32	1261.75	45	1234.75	564.25	13.475	50.1	0.770567
2004-05-16	06:00:00	0.4	821.5	-200	1.95185	580.5	34	1325.75	47	1256.25	602.25	14.175	49.9	0.802525
2004-05-16	07:00:00	0.8	918.25	-200	4.19206	721.25	57	1068.5	58	1353.25	784.75	13.775	51.4	0.805852
2004-05-16	08:00:00	0.9	975.25	-200	5.20175	773.5	73	1000.75	69	1393	878	16.3	45.05	0.828566
2004-05-16	09:00:00	1.6	1046.75	-200	8.22142	908.25	119	912.5	89	1458.25	981.25	19.225	35.425	0.781212
2004-05-16	10:00:00	2	1052.5	-200	9.78403	969.5	138	930	105	1472.5	991	25.5	21.05	0.677027
2004-05-16	11:00:00	1.6	1017.25	-200	7.94103	896.75	96	1013.25	92	1399.5	780.25	28.225	19	0.716397
2004-05-16	12:00:00	1.4	1020.75	-200	7.74842	888.75	80	1022	82	1405.25	683.75	29.475	19.775	0.80126
2004-05-16	13:00:00	0.9	940.75	-200	4.79456	753	45	1173.25	56	1311.25	467.5	30.55	19.375	0.834783
2004-05-16	14:00:00	0.9	991.25	-200	5.25238	776	45	1121.75	60	1375	468	29.95	22.05	0.918069
2004-05-16	15:00:00	1.2	1117	-200	7.12488	862.25	54	995	64	1476	529.75	31.5	21.925	0.996983
2004-05-16	16:00:00	1.4	1217	-200	9.19013	946.75	66	887	85	1566.25	647.75	31.2	24.575	1.09866
2004-05-16	17:00:00	1.9	1248.25	-200	10.1171	982	95	880.25	107	1617	745.75	30.425	26.525	1.13474
2004-05-16	18:00:00	1.8	1241.5	-200	9.87017	972.75	99	856	106	1631.5	818.5	26.775	33.475	1.16021
2004-05-16	19:00:00	2.7	1403.25	-200	15.0606	1150.5	147	747	125	1820.25	1124.75	25.475	37.35	1.19951
2004-05-16	20:00:00	2.4	1238	-200	10.5708	998.75	129	833.25	118	1648.25	1013.25	23.675	39.425	1.13808
2004-05-16	21:00:00	1.6	1092.75	-200	7.02696	858	96	975.25	95	1494.5	816	22.9	37	1.01974
2004-05-16	22:00:00	1.4	1033.75	-200	5.86012	805.25	92	1030.25	97	1416.25	750	20.75	36.25	0.87749
2004-05-16	23:00:00	1.4	934	-200	5.63347	794.5	88	1097.75	93	1327.5	672.5	20.25	28.475	0.668611
2004-05-17	00:00:00	1.4	912.5	-200	5.4312	784.75	89	1109.75	85	1272.75	692	19.6	26.475	0.59743
2004-05-17	01:00:00	0.9	835.25	-200	3.65042	691	52	1265.25	67	1182.25	517.25	19.1	25.925	0.567337
2004-05-17	02:00:00	0.5	773.25	-200	1.78856	568	25	1474	37	1113.25	392.25	18.425	27.625	0.579908
2004-05-17	03:00:00	0.4	771.25	-200	1.3585	532.5	-200	1566	-200	1110.25	360	17.375	30.225	0.594503
2004-05-17	04:00:00	-200	804.75	-200	1.37851	534.25	28	1453.75	40	1112.25	409	16.275	34.075	0.625731
2004-05-17	05:00:00	0.5	929.75	-200	3.52538	683.75	65	1058.5	75	1220.25	779	15.85	36.55	0.653508
2004-05-17	06:00:00	1.3	1008.5	-200	7.03845	858.5	132	944.25	102	1420	1016	16.025	38.05	0.68785
2004-05-17	07:00:00	2.6	1196	-200	14.4304	1130.5	216	775.25	113	1674.75	1243.25	17.575	34.975	0.696539
2004-05-17	08:00:00	2	1009.5	-200	8.9341	936.75	180	944.75	142	1443.5	949.25	18.55	31.25	0.661087
2004-05-17	09:00:00	1.8	989.75	-200	8.61841	924.25	140	973.75	90	1403.5	860.5	19.825	28.5	0.652047
2004-05-17	10:00:00	1.7	987.75	-200	8.46239	918	141	1007.25	94	1393	850.25	22.3	24.05	0.63938
2004-05-17	11:00:00	1.5	979.25	-200	8.27061	910.25	123	1028	92	1395.75	788	24.15	21.725	0.645116
2004-05-17	12:00:00	1.9	1028.5	-200	10.1305	982.5	129	949.5	97	1470.25	879.25	25.075	20.775	0.651647
2004-05-17	13:00:00	1.7	984	-200	9.13867	944.75	115	990	88	1423	747	25.8	19.525	0.639157
2004-05-17	14:00:00	1.5	984.75	-200	8.4935	919.25	104	1027.75	86	1387	699.75	26.25	18.875	0.63441
2004-05-17	15:00:00	1.7	980.75	-200	7.68268	886	129	1054	99	1362.5	695	25.775	18.6	0.607983
2004-05-17	16:00:00	1.7	1020	-200	9.02975	940.5	138	1015.5	95	1425	756.25	25.675	19.4	0.630416
2004-05-17	17:00:00	2.4	1106.25	-200	13.4008	1097	135	901.75	105	1552	941	26.725	17.1	0.590941
2004-05-17	18:00:00	3.1	1153.25	-200	15.6294	1168.25	163	842	121	1644	1020.75	24.325	19.775	0.593345
2004-05-17	19:00:00	3.4	1214.75	-200	17.8058	1233.75	180	795.5	125	1735	1167.25	23.525	20.75	0.593657
2004-05-17	20:00:00	3	1093.75	-200	12.6536	1072	170	887.75	122	1544.75	1104.5	21.975	24.025	0.626336
2004-05-17	21:00:00	1.2	943.5	-200	6.42949	831.5	72	1072.25	81	1349.5	711.75	21.075	26.25	0.648089
2004-05-17	22:00:00	1.2	963.75	-200	7.10179	861.25	69	1013.5	73	1398.25	734.5	20.85	28.8	0.7014
2004-05-17	23:00:00	1.3	1003.25	-200	7.35756	872.25	79	987.5	80	1439	851	20.2	31.2	0.730364
2004-05-18	00:00:00	1	913.75	-200	5.21692	774.25	53	1091.25	65	1322.75	706.25	19.95	31.5	0.726214
2004-05-18	01:00:00	0.4	839	-200	2.35021	609.25	36	1275.75	59	1285.5	642.5	20.75	32.275	0.781268
2004-05-18	02:00:00	0.3	829.75	-200	1.96517	581.5	30	1309.5	50	1264.25	608	19.95	34.5	0.795377
2004-05-18	03:00:00	0.2	812.25	-200	1.23283	521.25	-200	1412.75	-200	1233	469	21.2	32.875	0.81783
2004-05-18	04:00:00	-200	831.5	-200	1.52507	546.75	15	1319.5	23	1253.75	468.75	18.325	40	0.834513
2004-05-18	05:00:00	0.5	903.25	-200	3.06405	656	38	1155.25	37	1361.25	618	17.025	44.65	0.859291
2004-05-18	06:00:00	0.9	1021.67	-200	6.27911	824.667	68	930.667	54	1487.33	930.667	17.1333	45.3333	0.878354
2004-05-18	07:00:00	2.7	1378	-200	19.2998	1276.75	192	628.25	94	1970	1519	17.125	46.525	0.900975
2004-05-18	08:00:00	6.5	1745	-200	38.916	1748.25	346	484.25	139	2604.5	2053.75	18.825	39.725	0.854745
2004-05-18	09:00:00	3.2	1326	-200	14.634	1137	225	718.75	115	1759.5	1549.75	20.25	38.1	0.894612
2004-05-18	10:00:00	2.4	1215.25	-200	12.3453	1061.5	199	793.75	119	1650.25	1381	25.25	27.025	0.856489
2004-05-18	11:00:00	1.9	1138.25	-200	11.026	1015.25	140	853.75	103	1604.25	1115.25	27.45	22.8	0.821912
2004-05-18	12:00:00	2.7	1243.75	-200	15.4361	1162.25	162	765.25	123	1735.25	1188.5	29.95	20.025	0.833757
2004-05-18	13:00:00	2.9	1261	-200	17.0027	1210	173	735.75	126	1768.5	1199.75	30.875	19.125	0.839384
2004-05-18	14:00:00	2	1181.5	-200	12.4844	1066.25	121	818	106	1663	964.5	30.625	20.15	0.871888
2004-05-18	15:00:00	2.3	1207.5	-200	13.8118	1110.5	133	783	127	1652.5	1018.25	32.2	18.95	0.896434
2004-05-18	16:00:00	1.9	1158.25	-200	10.0769	980.5	96	861.5	105	1572.75	774.5	31.725	19.5	0.898064
2004-05-18	17:00:00	3	1345.5	-200	19.3352	1277.75	141	700.5	130	1873.25	1193.25	30.85	20.525	0.89955
2004-05-18	18:00:00	4.4	1442.75	-200	22.7332	1370.5	221	664.25	160	1987.75	1425	27.475	24.65	0.889895
2004-05-18	19:00:00	4.7	1440.25	-200	25.541	1442.75	232	634.5	162	2067.75	1594	25.75	27.025	0.882077
2004-05-18	20:00:00	3.4	1231.75	-200	15.7913	1173.25	174	750.75	135	1749.75	1283.5	23.65	29.95	0.86328
2004-05-18	21:00:00	2.4	1159.25	-200	12.3161	1060.5	138	811.75	122	1648.25	1173.75	22.175	33.375	0.88064
2004-05-18	22:00:00	1.2	1081.25	-200	8.74411	929.25	65	910	75	1518.25	936.5	21.1	36.475	0.901902
2004-05-18	23:00:00	1.7	1082.5	-200	8.28292	910.75	107	883.25	96	1507	984.5	20.175	38.575	0.90163
2004-05-19	00:00:00	1.2	1069.25	-200	7.70656	887	70	859	84	1541.5	1040.5	19.325	42.975	0.953547
2004-05-19	01:00:00	0.7	939.75	-200	4.23362	723.5	44	1012.25	68	1407	866.5	19.175	43.625	0.959092
2004-05-19	02:00:00	0.5	900.5	-200	3.01584	653	41	1094	65	1367	822	18.425	45.725	0.959866
2004-05-19	03:00:00	0.3	847.75	-200	1.83043	571.25	-200	1224.25	-200	1297.25	623.75	18.7	44.275	0.945335
2004-05-19	04:00:00	-200	845.5	-200	2.18359	597.5	33	1210.75	52	1332.25	668.5	16.325	51.4	0.946839
2004-05-19	05:00:00	0.3	848	-200	2.19407	598.25	32	1219.25	46	1318	628.25	17	49.225	0.945861
2004-05-19	06:00:00	0.7	980.25	-200	5.74895	800	46	983.25	54	1461.5	809.5	16.35	52.1	0.961238
2004-05-19	07:00:00	3.1	1408.25	-200	20.8814	1320.75	173	618.25	94	2043.75	1494.75	16.375	53.375	0.986305
2004-05-19	08:00:00	6.2	1716	-200	36.6921	1701	320	489.75	155	2544.75	2017.5	18.55	46.8	0.990044
2004-05-19	09:00:00	4.6	1475	-200	22.0087	1351.25	294	625.25	165	2005.5	1696	21.025	41.05	1.01042
2004-05-19	10:00:00	2.6	1262.25	-200	13.3705	1096	182	771.75	134	1710.5	1339.5	26.375	28.9	0.978497
2004-05-19	11:00:00	2.1	1155.75	-200	11.5461	1033.75	154	813.25	122	1640	1123	27.725	26.35	0.965174
2004-05-19	12:00:00	2	1191.5	-200	13.3857	1096.5	118	796.25	113	1688	971	30.1	22.1	0.928071
2004-05-19	13:00:00	2.2	1232.75	-200	15.1561	1153.5	116	746	115	1739.5	999.75	31	22.95	1.01444
2004-05-19	14:00:00	2.1	1208	-200	12.9727	1082.75	121	792	118	1702	891.25	31	22.65	1.00118
2004-05-19	15:00:00	2.3	1214.5	-200	13.9885	1116.25	116	783.5	125	1715.25	851.75	31.575	21	0.958981
2004-05-19	16:00:00	2.5	1251	-200	15.5085	1164.5	144	747.25	135	1774.25	974.5	30.375	24.675	1.05259
2004-05-19	17:00:00	3.4	1357.75	-200	19.3263	1277.5	176	689.25	149	1898.5	1192	28.85	26.275	1.02708
2004-05-19	18:00:00	4.3	1378.75	-200	21.9154	1348.75	214	645	162	1960.75	1372.75	26.425	30.05	1.02042
2004-05-19	19:00:00	3.8	1379	-200	21.0645	1325.75	191	659.25	151	1960.75	1306.75	24.7	31.525	0.967159
2004-05-19	20:00:00	3.8	1372.75	-200	18.4163	1251.5	205	669.5	154	1889	1325	22.95	36.475	1.00829
2004-05-19	21:00:00	2	1197	-200	9.26107	949.5	110	822.75	118	1591.5	918	20.8	41.825	1.01552
2004-05-19	22:00:00	1.7	1238.25	-200	9.0042	939.5	95	814.75	103	1622.25	877	19.675	47.05	1.06661
2004-05-19	23:00:00	2	1254.75	-200	9.61273	963	126	780.75	122	1664.5	1023.5	18.95	52.175	1.1313
2004-05-20	00:00:00	1.5	1164.25	-200	8.22142	908.25	90	821	102	1573.5	1018.5	18.45	50.125	1.05386
2004-05-20	01:00:00	0.8	1046	-200	5.81236	803	48	899.5	73	1490	822.75	18	52.975	1.0832
2004-05-20	02:00:00	0.5	956	-200	3.14513	661	38	1042.5	59	1398	701	18.375	51.7	1.08195
2004-05-20	03:00:00	0.3	885.25	-200	1.74394	564.5	-200	1217	-200	1328.5	541.5	19.8	46.225	1.05596
2004-05-20	04:00:00	-200	876.5	-200	1.55514	549.25	14	1265.25	26	1316.75	462.75	19.575	47.65	1.07362
2004-05-20	05:00:00	0.3	924.75	-200	2.34301	608.75	26	1168.25	35	1363	533.25	17.3	54.05	1.05817
2004-05-20	06:00:00	0.9	1086	-200	6.55721	837.25	83	884.5	68	1552.5	905.75	15.775	58.975	1.0495
2004-05-20	07:00:00	2.8	1489.5	-200	19.619	1285.75	188	592.75	97	2052.5	1446.5	16.6	55.95	1.04855
2004-05-20	08:00:00	5.4	1762.75	-200	32.8882	1617.25	253	489	146	2503.25	1835	18.7	52.825	1.12789
2004-05-20	09:00:00	4	1461.5	-200	18.0713	1241.5	149	636.5	83	1960.5	1551.75	20.725	46.45	1.12269
2004-05-20	10:00:00	2.2	1232	-200	12.3526	1061.75	155	787.25	117	1707	1091.5	26.075	29.975	0.997211
2004-05-20	11:00:00	2.2	1238.5	-200	12.5064	1067	146	779.25	117	1701.5	1071.25	28.65	25.85	0.998889
2004-05-20	12:00:00	2	1218	-200	12.033	1050.75	121	795.5	108	1688.75	881.25	30.25	23.3	0.986876
2004-05-20	13:00:00	2	1235.25	-200	13.3102	1094	111	755.75	107	1728.75	907.25	31.35	22.275	1.00433
2004-05-20	14:00:00	1.9	1195.5	-200	12.3161	1060.5	116	791	120	1649.25	899.25	31.075	22.275	0.9888
2004-05-20	15:00:00	2.7	1287.5	-200	15.9702	1178.75	167	717.25	150	1798.5	1074.25	32.35	20.4	0.973209
2004-05-20	16:00:00	2.2	1247.5	-200	13.7429	1108.25	145	772	138	1700.5	969.25	32.6	19.325	0.934974
2004-05-20	17:00:00	3.5	1401.25	-200	21.6734	1342.25	192	663	148	1958.75	1267	31.2	20.275	0.906422
2004-05-20	18:00:00	4.1	1401.25	-200	23.7179	1396.25	231	644.75	168	2008.75	1401.5	27.75	24.825	0.910634
2004-05-20	19:00:00	4.4	1444	-200	22.1116	1354	248	655	172	1955.75	1437.25	25.7	27.9	0.907963
2004-05-20	20:00:00	4.5	1379.25	-200	20.5717	1312.25	267	683	179	1869.75	1381.5	24.15	29.9	0.887869
2004-05-20	21:00:00	2.9	1251	-200	13.3907	1096.67	181	770.667	143	1679.67	1280.33	22.1667	34.4	0.90723
2004-05-20	22:00:00	2.6	1268.75	-200	12.7868	1076.5	163	773	137	1705.5	1249.75	20.65	38.025	0.914876
2004-05-20	23:00:00	2.1	1242.25	-200	12.3015	1060	141	745	117	1692.5	1359.25	20.15	42.775	0.998274
2004-05-21	00:00:00	1.2	1044.5	-200	6.84989	850.25	78	888.5	93	1505.5	1101.5	20.475	42.025	1.0004
2004-05-21	01:00:00	0.6	936.5	-200	3.77732	698.25	42	1039.25	64	1381.5	768.25	20.075	42.025	0.976289
2004-05-21	02:00:00	0.3	874.75	-200	2.52944	621.5	35	1166.5	58	1330.75	656.25	19.975	41.45	0.957066
2004-05-21	03:00:00	0.3	889.25	-200	2.70661	633.25	-200	1123	-200	1344.25	683.25	16.25	51.6	0.946065
2004-05-21	04:00:00	-200	888	-200	2.8068	639.75	33	1088.5	47	1330	670.25	16.45	50.2	0.932003
2004-05-21	05:00:00	0.3	880.5	-200	2.56297	623.75	38	1135.25	47	1319.25	656.25	16.425	50.225	0.931009
2004-05-21	06:00:00	0.7	997.5	-200	6.96963	855.5	65	893.75	62	1487.75	925.75	14.9	54.65	0.920295
2004-05-21	07:00:00	4.2	1517	-200	26.2118	1459.5	296	550.5	113	2204.5	1676.75	16.35	51.35	0.947401
2004-05-21	08:00:00	4.8	1521.75	-200	28.2268	1508.75	303	542.75	126	2274.5	1827.75	18.2	46.25	0.957476
2004-05-21	09:00:00	3.4	1416.75	-200	20.2189	1302.5	244	635	139	1964.25	1752.25	20.675	40	0.963859
2004-05-21	10:00:00	2.8	1329	-200	17.12	1213.5	216	699.5	148	1845	1580.5	26.5	27.025	0.92173
2004-05-21	11:00:00	1.8	1203	-200	11.2497	1023.25	137	824.5	117	1622	1132.25	28.525	23.85	0.914985
2004-05-21	12:00:00	1.9	1233.5	-200	11.6385	1037	120	788.25	106	1657.75	1037	29.675	23.7	0.971365
2004-05-21	13:00:00	2	1285.75	-200	13.1822	1089.75	100	750.25	98	1718.75	1023.25	31.675	21.7	0.996565
2004-05-21	14:00:00	1.9	1298	-200	12.7423	1075	103	748.75	98	1689.5	1021.75	31.725	21.5	0.990173
2004-05-21	15:00:00	2	1308	-200	12.9951	1083.5	123	757.25	110	1724	988.75	32.775	19.475	0.951534
2004-05-21	16:00:00	2.3	1276	-200	13.4689	1099.25	136	783	114	1679.75	924.75	32.475	18.625	0.894799
2004-05-21	17:00:00	2.7	1233.5	-200	10.1843	984.5	158	814.5	122	1571.5	794.5	30.2	22.55	0.952389
2004-05-21	18:00:00	3.6	1419	-200	20.1199	1299.75	216	670.25	155	1923.25	1262.75	27.65	25.725	0.938189
2004-05-21	19:00:00	3.8	1324.75	-200	19.1499	1272.5	211	716.25	145	1814.5	1183.5	25.925	24.85	0.819467
2004-05-21	20:00:00	3.5	1345.5	-200	17.4827	1224.25	202	714.5	146	1794	1271.5	23.875	29.4	0.858861
2004-05-21	21:00:00	2.5	1241	-200	13.8041	1110.25	147	771.5	130	1697.75	1176.5	22.25	32.125	0.851492
2004-05-21	22:00:00	2.5	1274.25	-200	13.3177	1094.25	160	770.5	126	1682.25	1230.5	20.5	35.925	0.856494
2004-05-21	23:00:00	3	1321.25	-200	14.8387	1143.5	162	731.75	127	1744.75	1242.75	19.8	37.25	0.850934
2004-05-22	00:00:00	3.7	1423.5	-200	18.0026	1239.5	194	661.5	126	1841	1427	19.1	41.85	0.915837
2004-05-22	01:00:00	3.3	1357.25	-200	15.9539	1178.25	167	673.75	124	1782.25	1454	17.85	46.125	0.93441
2004-05-22	02:00:00	1.5	1123.25	-200	9.67846	965.5	91	770	93	1594.25	1183	17.55	47.6	0.946499
2004-05-22	03:00:00	0.7	1003.25	-200	6.17185	819.75	-200	901.75	-200	1454.75	907.75	17.875	46.3	0.939411
2004-05-22	04:00:00	-200	950.5	-200	4.04572	713.25	42	993.5	58	1385	821.25	16.95	49.825	0.954408
2004-05-22	05:00:00	0.5	941.25	-200	3.5812	687	50	1023.5	59	1374.25	777.25	15.85	53.775	0.961488
2004-05-22	06:00:00	0.5	986	-200	4.62988	744.5	61	959	66	1426.25	887.5	16.45	53.475	0.992806
2004-05-22	07:00:00	1.2	1153.25	-200	9.18369	946.5	107	794.5	80	1642.5	1075.75	17.175	52.9	1.02763
2004-05-22	08:00:00	2.2	1322.5	-200	14.634	1137	139	696.25	94	1845.5	1284.75	19.325	48.325	1.07225
2004-05-22	09:00:00	2.2	1315.25	-200	11.7241	1040	165	743.25	102	1740	1315.25	20.575	47.125	1.12866
2004-05-22	10:00:00	2.1	1302.5	-200	11.0121	1014.75	139	776.75	96	1730.75	1250	23.65	40	1.15296
2004-05-22	11:00:00	1.8	1238.25	-200	11.6243	1036.5	113	812.5	91	1698	977.75	25.625	32.5	1.05301
2004-05-22	12:00:00	2.2	1258.5	-200	12.8982	1080.25	138	771.75	104	1736	1072.25	27.225	28.075	0.998913
2004-05-22	13:00:00	2	1246	-200	12.5873	1069.75	104	769.75	84	1747.25	1064.25	27.925	28.05	1.03942
2004-05-22	14:00:00	1.4	1154	-200	8.30758	911.75	78	871.5	76	1604.5	825	28.35	27.75	1.0539
2004-05-22	15:00:00	1.8	1237	-200	10.5298	997.25	97	800.25	87	1687.75	924	29.25	27.025	1.08098
2004-05-22	16:00:00	2.1	1315	-200	11.7384	1040.5	115	773	101	1766.75	965.5	28.925	29.3	1.15028
2004-05-22	17:00:00	2.8	1466.25	-200	15.8075	1173.75	152	680	115	1964.75	1301.5	25.45	39.825	1.27712
2004-05-22	18:00:00	2.8	1409	-200	13.8731	1112.5	157	710	110	1849.5	1255.5	25.15	40.125	1.26418
2004-05-22	19:00:00	2.7	1366.25	-200	15.7103	1170.75	132	693	103	1933.25	1068.25	24.525	39.4	1.19629
2004-05-22	20:00:00	1.8	1240.5	-200	10.908	1011	98	780.5	90	1747.5	1069.75	22.325	45.4	1.2088
2004-05-22	21:00:00	1.2	1122.5	-200	6.44609	832.25	65	930	68	1565.25	791.5	21.225	48.3	1.20338
2004-05-22	22:00:00	2.6	1320.75	-200	12.7497	1075.25	101	756.75	85	1891.25	1016.75	20.55	50.525	1.20825
2004-05-22	23:00:00	3.1	1397	-200	15.3319	1159	134	681.25	100	1948.75	1206.5	20.15	52.875	1.23399
2004-05-23	00:00:00	4.1	1507.25	-200	20.5082	1310.5	177	607.5	114	2107	1498.75	19.85	54.5	1.24881
2004-05-23	01:00:00	3.6	1405.25	-200	15.905	1176.75	179	659.75	108	1931	1474	19.525	56.2	1.26238
2004-05-23	02:00:00	1.9	1192	-200	10.4345	993.75	105	758.75	78	1780	1163	18.95	58.025	1.25814
2004-05-23	03:00:00	1.9	1199.25	-200	12.602	1070.25	-200	671	-200	1872.5	1188.5	18.1	61.625	1.2679
2004-05-23	04:00:00	-200	972.5	-200	4.94683	760.75	49	953.75	55	1501.25	814.75	18	57.65	1.1788
2004-05-23	05:00:00	0.3	864	-200	2.09025	590.75	27	1246.75	37	1373.5	506.75	17.65	56.05	1.12147
2004-05-23	06:00:00	0.4	886	-200	2.19058	598	41	1256.75	53	1374	505.5	17.925	52.35	1.06546
2004-05-23	07:00:00	0.8	988.25	-200	4.03211	712.5	78	1092.25	79	1454.5	715.75	18.925	49.275	1.06678
2004-05-23	08:00:00	0.8	1008.25	-200	4.3266	728.5	68	1033.75	65	1489.75	795	19.95	48.575	1.11987
2004-05-23	09:00:00	0.8	975.5	-200	3.77732	698.25	64	1156.25	64	1393.25	593.75	20.55	41.15	0.984056
2004-05-23	10:00:00	0.8	978.25	-200	4.13234	718	67	1137.25	66	1392	565	23.575	33.975	0.974927
2004-05-23	11:00:00	0.9	987.25	-200	4.53893	739.75	54	1105	53	1407	522.5	26.7	28.075	0.9688
2004-05-23	12:00:00	1.2	1030	-200	5.28794	777.75	67	1070.5	69	1451.5	591	26.825	28.15	0.978503
2004-05-23	13:00:00	1	954.667	-200	4.22437	723	51	1129	57	1393	558.667	27.7333	25.8333	0.946707
2004-05-23	14:00:00	0.8	924.25	-200	3.33503	672.5	28	1247	36	1346	429.5	28.85	22.675	0.886356
2004-05-23	15:00:00	1.1	1004.75	-200	4.89749	758.25	51	1091	57	1434.25	521.75	26.775	27.3	0.946191
2004-05-23	16:00:00	1.5	1059	-200	6.09597	816.25	77	1023	73	1467.75	641.25	25.85	28.7	0.942268
2004-05-23	17:00:00	1.5	1079.25	-200	6.85557	850.5	93	991	81	1490	738.25	25.8	27.725	0.907587
2004-05-23	18:00:00	1.4	1070	-200	6.84421	850	94	997.25	91	1502	778.25	24.75	29.5	0.907716
2004-05-23	19:00:00	1.1	1085.25	-200	5.84949	804.75	69	972.25	65	1528.25	717.75	25.275	36.275	1.15134
2004-05-23	20:00:00	0.9	1066	-200	5.48276	787.25	57	985.5	56	1551.5	689.25	23.875	40.35	1.17874
2004-05-23	21:00:00	1	1093.5	-200	6.07437	815.25	74	934.25	69	1562.75	852	21.425	46.65	1.17643
2004-05-23	22:00:00	1.1	1110	-200	6.04741	814	75	947.5	73	1570.5	853.75	20.475	49.275	1.17299
2004-05-23	23:00:00	1	967.75	-200	4.15527	719.25	73	1080.75	76	1388.25	664.25	19.225	42.35	0.933926
2004-05-24	00:00:00	0.7	906	-200	4.05026	713.5	56	1162.75	67	1350.75	544.25	19.225	37.875	0.835241
2004-05-24	01:00:00	0.5	849.25	-200	2.43364	615	31	1285.25	44	1275.75	461	17.225	43.075	0.839378
2004-05-24	02:00:00	0.2	774.25	-200	1.00982	500	13	1536	21	1168.5	351.75	15.8	45.175	0.805186
2004-05-24	03:00:00	-200	746.25	-200	0.560247	449.75	-200	1806.75	-200	1110.5	307.75	15.65	42.275	0.746418
2004-05-24	04:00:00	-200	753.25	-200	0.464418	437	14	1903.75	19	1109.5	300.5	16.25	40.975	0.75126
2004-05-24	05:00:00	0.1	749	-200	0.691173	465.75	23	1802.5	29	1088.75	306.75	16.125	36.5	0.663986
2004-05-24	06:00:00	0.5	863.5	-200	2.83794	641.75	72	1288	69	1254.75	441	16.525	36.2	0.675245
2004-05-24	07:00:00	1.6	1001.5	-200	7.83845	892.5	165	1009.75	111	1394	775	17.475	30.875	0.611076
2004-05-24	08:00:00	2	970	-200	9.68505	965.75	118	943.5	81	1378.5	907	18.45	24	0.50459
2004-05-24	09:00:00	1.3	897.5	-200	6.9011	852.5	85	1065.5	56	1271.25	763.25	19.15	23.85	0.523535
2004-05-24	10:00:00	1	846.5	-200	5.75422	800.25	116	1155.25	90	1178.5	648.5	21.725	18.075	0.464163
2004-05-24	11:00:00	0.9	847.25	-200	5.4931	787.75	112	1202.5	85	1162.25	597.75	22.3	16.975	0.451288
2004-05-24	12:00:00	1.2	871.25	-200	6.79318	847.75	100	1139.25	83	1207.75	578.5	22.775	16.1	0.440413
2004-05-24	13:00:00	1.3	869.25	-200	7.20596	865.75	109	1107	85	1212	595.5	23.85	14.475	0.422229
2004-05-24	14:00:00	1.1	875.25	-200	6.92962	853.75	111	1159.75	85	1200.25	594.75	25.125	13.125	0.412907
2004-05-24	15:00:00	1.2	895	-200	7.48099	877.5	109	1121.75	81	1238	607	25.85	12.85	0.421886
2004-05-24	16:00:00	1.4	925.75	-200	7.65288	884.75	114	1100.5	92	1259.25	661.75	25.5	13.975	0.449475
2004-05-24	17:00:00	2	996	-200	11.9537	1048	139	958.75	108	1397.25	822.25	24.45	15.425	0.466268
2004-05-24	18:00:00	2.4	996.75	-200	13.4992	1100.25	157	896	106	1392	986.5	22.6	17.2	0.465589
2004-05-24	19:00:00	2.1	1005.75	-200	11.9609	1048.25	147	924.5	114	1416.25	966.25	21.25	18.875	0.470978
2004-05-24	20:00:00	1.2	894.5	-200	6.73104	845	102	1072	96	1240.5	763	19.15	22.825	0.501035
2004-05-24	21:00:00	0.7	861.5	-200	4.75559	751	73	1153.5	77	1213.25	617.25	18.425	24.625	0.516932
2004-05-24	22:00:00	0.7	858.25	-200	4.84836	755.75	65	1158.5	73	1209	564.25	17.35	25.625	0.503241
2004-05-24	23:00:00	0.8	853	-200	4.97654	762.25	76	1133.75	86	1184	645.75	16.5	24.925	0.464203
2004-05-25	00:00:00	0.5	858.75	-200	4.29396	726.75	65	1119.75	84	1187.25	752.5	16.65	28.275	0.531559
2004-05-25	01:00:00	0.2	836.5	-200	2.71043	633.5	41	1199.5	56	1149.5	669.25	15.525	32.2	0.564072
2004-05-25	02:00:00	-200	745.5	-200	0.940546	493	17	1522	31	1062.75	435.25	17.5	29.125	0.577337
2004-05-25	03:00:00	-200	752.25	-200	1.16795	515.25	-200	1472.25	-200	1068	435.75	13.25	35.575	0.539345
2004-05-25	04:00:00	-200	742	-200	0.897123	488.5	19	1559	30	1047.5	403.25	13.975	33.725	0.535527
2004-05-25	05:00:00	0.1	773.5	-200	1.68102	559.5	45	1386	51	1107	532	11.625	40	0.546186
2004-05-25	06:00:00	0.2	797.5	-200	2.64951	629.5	40	1291	45	1125.25	536.25	13.375	34.5	0.527248
2004-05-25	07:00:00	1.1	1002.25	-200	8.81357	932	101	949.25	82	1404.5	916.5	15.225	31	0.53287
2004-05-25	08:00:00	3	1210	-200	22.1678	1355.5	183	656.5	100	1786.25	1480.75	16.325	27.5	0.506577
2004-05-25	09:00:00	2.1	1058	-200	15.3079	1158.25	149	819.75	91	1458.75	1187	19.15	20	0.439023
2004-05-25	10:00:00	2.6	1105.5	-200	14.0347	1117.75	207	884.5	130	1451	1220	24.875	13.025	0.403754
2004-05-25	11:00:00	3.2	1153	-200	18.4683	1253	289	814.5	155	1541.25	1380.5	28.325	9.9	0.375444
2004-05-25	12:00:00	2.1	1047.25	-200	13.5296	1101.25	159	912.5	114	1390.5	1102.75	29.225	9.8	0.391429
2004-05-25	13:00:00	2.2	1090.75	-200	15.7508	1172	162	874.25	127	1459.25	1105	31.575	9.175	0.418983
2004-05-25	14:00:00	2.4	1162.25	-200	18.4509	1252.5	173	795.75	138	1594.5	1248.25	32.6	9.3	0.449949
2004-05-25	15:00:00	-200	1058.75	-200	12.5873	1069.75	-200	925	-200	1401	976.25	32.6	9.225	0.44632
2004-05-25	16:00:00	-200	1082.5	-200	12.0402	1051	-200	938.5	-200	1389.75	897.75	32.35	9.95	0.474678
2004-05-25	17:00:00	-200	1149.5	-200	15.38	1160.5	-200	866.5	-200	1512	1038.25	32.05	10.65	0.49956
2004-05-25	18:00:00	-200	1321	-200	24.8777	1426	-200	720	-200	1859	1395	29.7	12.2	0.500744
2004-05-25	19:00:00	-200	-200	-200	-200	-200	-200	-200	-200	-200	-200	-200	-200	-200
2004-05-25	20:00:00	-200	-200	-200	-200	-200	-200	-200	-200	-200	-200	-200	-200	-200
2004-05-25	21:00:00	-200	-200	-200	-200	-200	-200	-200	-200	-200	-200	-200	-200	-200
2004-05-25	22:00:00	-200	-200	-200	-200	-200	-200	-200	-200	-200	-200	-200	-200	-200
2004-05-25	23:00:00	-200	-200	-200	-200	-200	-200	-200	-200	-200	-200	-200	-200	-200
2004-05-26	00:00:00	-200	-200	-200	-200	-200	-200	-200	-200	-200	-200	-200	-200	-200
2004-05-26	01:00:00	-200	-200	-200	-200	-200	-200	-200	-200	-200	-200	-200	-200	-200
2004-05-26	02:00:00	-200	-200	-200	-200	-200	-200	-200	-200	-200	-200	-200	-200	-200
2004-05-26	03:00:00	-200	-200	-200	-200	-200	-200	-200	-200	-200	-200	-200	-200	-200
2004-05-26	04:00:00	-200	-200	-200	-200	-200	-200	-200	-200	-200	-200	-200	-200	-200
2004-05-26	05:00:00	-200	-200	-200	-200	-200	-200	-200	-200	-200	-200	-200	-200	-200
2004-05-26	06:00:00	-200	-200	-200	-200	-200	-200	-200	-200	-200	-200	-200	-200	-200
2004-05-26	07:00:00	-200	-200	-200	-200	-200	-200	-200	-200	-200	-200	-200	-200	-200
2004-05-26	08:00:00	-200	-200	-200	-200	-200	-200	-200	-200	-200	-200	-200	-200	-200
2004-05-26	09:00:00	4	1302.75	-200	40.2238	1775.5	-200	945.5	-200	1466.75	1607.75	20.35	35.725	0.843977
2004-05-26	10:00:00	2.2	1137.25	-200	14.9257	1146.25	188	1144	136	1392.25	1326.75	26.1	23.825	0.793775
2004-05-26	11:00:00	1.8	1139.25	-200	13.7735	1109.25	159	1117.75	135	1435.75	1291.5	28.775	21.05	0.819289
2004-05-26	12:00:00	1.6	1099.25	-200	12.2724	1059	146	1156.25	115	1416.25	1113.75	29.6	19.35	0.789677
2004-05-26	13:00:00	1.8	1087.5	-200	13.9885	1116.25	127	1128	112	1448.5	1059.5	31.575	16.4	0.748918
2004-05-26	14:00:00	1.6	1026.75	-200	11.7527	1041	128	1236.75	112	1344.5	915	32.3	13.25	0.630333
2004-05-26	15:00:00	1.6	1014	-200	11.9681	1048.5	120	1200	109	1365.75	893.25	31.75	13.55	0.624921
2004-05-26	16:00:00	1.3	969	-200	9.73119	967.5	115	1275.5	112	1324.5	767.75	31.8	13.825	0.639407
2004-05-26	17:00:00	-200	1120.25	-200	17.9512	1238	-200	1022.75	-200	1591.25	1126	31	15.925	0.703917
2004-05-26	18:00:00	-200	1130.5	-200	22.6196	1367.5	-200	933.25	-200	1707.25	1284	28.625	18.7	0.72156
2004-05-26	19:00:00	-200	1130.33	-200	22.6512	1368.33	-200	933	-200	1709	1269.33	26.7333	19.5333	0.675361
2004-05-26	20:00:00	-200	1123.25	-200	20.255	1303.5	-200	938.75	-200	1720	1290.25	24.975	24.425	0.761624
2004-05-26	21:00:00	-200	1068.75	-200	13.0548	1085.5	-200	1063.5	-200	1536	1119.25	22.85	28.4	0.780379
2004-05-26	22:00:00	-200	1020.75	-200	10.8734	1009.75	-200	1115.75	-200	1480.25	1027	21.65	29.175	0.745822
2004-05-26	23:00:00	-200	1101.25	-200	13.28	1093	-200	1011.75	-200	1563.5	1155.25	21.075	30.85	0.761659
2004-05-27	00:00:00	-200	1026	-200	9.54064	960.25	-200	1071.75	-200	1470.75	1077.5	19.9	36.325	0.834895
2004-05-27	01:00:00	-200	949.25	-200	6.63547	840.75	-200	1155.25	-200	1393.25	953.5	18.65	39.25	0.835464
2004-05-27	02:00:00	-200	845.75	-200	3.5812	687	-200	1294.75	-200	1288.25	725.75	18.6	38.775	0.822812
2004-05-27	03:00:00	-200	810.75	-200	2.30003	605.75	-200	1416.75	-200	1247.75	655.75	19.025	38.875	0.846818
2004-05-27	04:00:00	-200	803	-200	2.02561	586	-200	1441.75	-200	1231.75	572.5	18.05	40.925	0.839407
2004-05-27	05:00:00	-200	882	-200	4.0821	715.25	-200	1246	-200	1367	779.5	15.5	48.625	0.850461
2004-05-27	06:00:00	-200	962.5	-200	6.52379	835.75	-200	1085.25	-200	1429	919.75	16.025	47.9	0.865914
2004-05-27	07:00:00	-200	1412.5	-200	24.7891	1423.75	-200	739.25	-200	2101.5	1543.75	16.975	46.025	0.882995
2004-05-27	08:00:00	-200	1485.25	-200	34.3546	1650	-200	632.25	-200	2336.5	1788.75	18.975	41.625	0.903936
2004-05-27	09:00:00	-200	1354.25	-200	24.5439	1417.5	-200	749	-200	2043	1628.75	21.75	35	0.900152
2004-05-27	10:00:00	-200	1073.75	-200	8.99144	939	-200	1070.5	-200	1513	996.75	25.625	28.05	0.908827
2004-05-27	11:00:00	-200	1022.25	-200	8.36936	914.25	-200	1131.75	-200	1446.25	847.25	26.425	23.125	0.785261
2004-05-27	12:00:00	-200	1100.25	-200	11.539	1033.5	-200	994.5	-200	1585.75	957.5	27.125	24.2	0.856041
2004-05-27	13:00:00	-200	1072.5	-200	12.0764	1052.25	-200	1009	-200	1574.25	853.75	27.5	20.925	0.756516
2004-05-27	14:00:00	-200	1049.25	-200	10.1372	982.75	-200	1070.5	-200	1514.5	782	29.525	19.725	0.801529
2004-05-27	15:00:00	-200	1086	-200	11.9393	1047.5	-200	1016.25	-200	1580.25	888	30.55	18.6	0.801392
2004-05-27	16:00:00	-200	1059.25	-200	11.3411	1026.5	-200	1065.5	-200	1521.25	764.25	31.25	15.85	0.710607
2004-05-27	17:00:00	-200	1243.75	-200	20.1559	1300.75	-200	841.5	-200	1801	1169.75	29.4	20.95	0.845226
2004-05-27	18:00:00	-200	1319.5	-200	24.7695	1423.25	-200	766.5	-200	1985.5	1385	27.025	23.475	0.825571
2004-05-27	19:00:00	-200	1235.5	-200	20.264	1303.75	-200	822.25	-200	1868.25	1237	25.85	26.675	0.875784
2004-05-27	20:00:00	-200	1135.75	-200	16.2237	1186.5	-200	903.75	-200	1735.25	1126.5	23.7	28.45	0.822491
2004-05-27	21:00:00	-200	1109.75	-200	13.28	1093	-200	961	-200	1660.75	1090.75	21.35	33	0.828433
2004-05-27	22:00:00	-200	1025.75	-200	10.3395	990.25	-200	1031.5	-200	1552.75	971.5	20.525	35.325	0.843473
2004-05-27	23:00:00	-200	1038	-200	9.56683	961.25	-200	1026	-200	1529.75	949	19.425	38.125	0.85114
2004-05-28	00:00:00	-200	975.25	-200	7.82041	891.75	-200	1015.25	-200	1479.5	889.5	19.35	40.7	0.904455
2004-05-28	01:00:00	-200	907.75	-200	6.05279	814.25	-200	1088.5	-200	1402.5	763	17.75	44.85	0.902962
2004-05-28	02:00:00	-200	895.75	-200	6.17728	820	-200	1073.75	-200	1439.25	833.25	16.575	49.675	0.9295
2004-05-28	03:00:00	-200	810	-200	3.75092	696.75	-200	1220.5	-200	1321.25	675	16.475	48.55	0.902781
2004-05-28	04:00:00	-200	789.25	-200	2.77194	637.5	-200	1304.5	-200	1309	671.75	15.2	53.55	0.919039
2004-05-28	05:00:00	-200	814	-200	3.42753	678	-200	1276.25	-200	1339	625.75	15.475	51.65	0.901946
2004-05-28	06:00:00	-200	957.5	-200	8.18461	906.75	-200	991.5	-200	1535.75	881.75	14.925	54.825	0.924703
2004-05-28	07:00:00	-200	1213	-200	19.1939	1273.75	-200	761.5	-200	1914.25	1264.25	16.275	51.275	0.941581
2004-05-28	08:00:00	-200	1220.75	-200	22.6102	1367.25	-200	722	-200	2007.5	1330	18.375	45.675	0.955859
2004-05-28	09:00:00	-200	1245	-200	19.4414	1280.75	-200	773.5	-200	1952	1324	20.825	43.65	1.06145
2004-05-28	10:00:00	-200	1049.5	-200	9.60617	962.75	-200	998.25	-200	1609	901	24.25	35.075	1.04774
2004-05-28	11:00:00	-200	1047.5	-200	9.7642	968.75	-200	1011.5	-200	1600	852	26.35	29.25	0.988899
2004-05-28	12:00:00	-200	1141.25	-200	14.3603	1128.25	-200	902	-200	1738	1009	28.35	25	0.949462
2004-05-28	13:00:00	-200	1052.25	-200	12.1053	1053.25	-200	949	-200	1640.75	830.75	28.925	23.65	0.928469
2004-05-28	14:00:00	-200	1151.75	-200	13.4689	1099.25	-200	907.75	-200	1706	954	28.55	25.85	0.993145
2004-05-28	15:00:00	1.7	1026.25	-200	12.3234	1060.75	133	981.5	115	1563.75	814.25	29.575	18.875	0.76919
2004-05-28	16:00:00	1.7	1039.25	-200	12.1561	1055	131	965.5	117	1589.5	844.5	27.975	23.175	0.861267
2004-05-28	17:00:00	2.1	1147.75	-200	12.4991	1066.75	133	887.25	105	1789.75	955.5	23.625	40.95	1.17859
2004-05-28	18:00:00	2.2	1176.25	-200	13.9039	1113.5	141	842.75	114	1805.25	1102	21.45	48.1	1.21484
2004-05-28	19:00:00	1.8	1099.75	-200	11.3693	1027.5	112	899.75	103	1710.25	993.75	22.075	44.125	1.1573
2004-05-28	20:00:00	1.8	1081.25	-200	10.3937	992.25	147	958.5	119	1679.75	935.25	20.2	47.175	1.10433
2004-05-28	21:00:00	0.9	976	-200	7.03271	858.25	104	1069.75	102	1547.25	838.5	20.025	47.625	1.10301
2004-05-28	22:00:00	1	978.75	-200	7.00974	857.25	97	1081.75	96	1546	796.5	19.8	46.825	1.06966
2004-05-28	23:00:00	2	1092.25	-200	11.2778	1024.25	128	937	109	1706.25	968	19.6	47	1.06059
2004-05-29	00:00:00	1.8	1043.5	-200	9.17725	946.25	138	1008.5	119	1593.5	885.75	19.325	46.325	1.02788
2004-05-29	01:00:00	1.1	940.25	-200	6.81017	848.5	93	1090.5	103	1508.75	763.5	18.525	48.7	1.02865
2004-05-29	02:00:00	0.6	892	-200	5.06612	766.75	71	1180	84	1466	656.75	17.975	51.45	1.05039
2004-05-29	03:00:00	0.3	838.25	-200	3.37274	674.75	-200	1301.5	-200	1389.75	540.25	17.95	50.8	1.03552
2004-05-29	04:00:00	-200	853.25	-200	4.30327	727.25	44	1179.25	59	1417.25	621	17.65	51.875	1.03793
2004-05-29	05:00:00	-200	737.75	-200	1.5012	544.75	18	1562	29	1265.75	449.5	17.675	49.75	0.996961
2004-05-29	06:00:00	0.1	762	-200	1.96184	581.25	41	1587.75	45	1276.5	434	17.925	46.1	0.938257
2004-05-29	07:00:00	0.5	840.75	-200	4.04572	713.25	84	1293	80	1356	558.75	18.375	43.925	0.919236
2004-05-29	08:00:00	0.6	842.5	-200	4.014	711.5	77	1303.25	77	1343	547.75	18.875	42.075	0.908101
2004-05-29	09:00:00	0.5	841	-200	4.04572	713.25	73	1326.25	68	1329.5	524.5	19.175	39.7	0.872801
2004-05-29	10:00:00	0.7	862.333	-200	4.18132	720.667	72	1329.33	66	1335	522.333	20.8	36.5667	0.88785
2004-05-29	11:00:00	0.7	868.75	-200	4.53417	739.5	77	1296	70	1366.25	535	21.35	35.75	0.89747
2004-05-29	12:00:00	0.9	894	-200	5.96683	810.25	82	1204.25	74	1420.5	584.75	21.825	34.85	0.900361
2004-05-29	13:00:00	0.7	844.25	-200	4.83856	755.25	67	1283.5	64	1350.25	520.75	22.825	31.4	0.861521
2004-05-29	14:00:00	0.4	822.75	-200	3.79497	699.25	59	1381.75	60	1311	493	22.875	31.325	0.862043
2004-05-29	15:00:00	0.5	842.75	-200	4.15068	719	61	1353	63	1330.25	500.5	22.9	30.7	0.84611
2004-05-29	16:00:00	0.6	865.25	-200	5.06112	766.5	76	1279	75	1368.5	559.25	23.8	29.225	0.849945
2004-05-29	17:00:00	0.6	872.75	-200	5.5761	791.75	73	1246.5	79	1396.75	589.25	23.15	30.175	0.844181
2004-05-29	18:00:00	0.8	899.25	-200	5.80707	802.75	87	1220.75	83	1425.75	596.25	22.4	31.275	0.836476
2004-05-29	19:00:00	1	921	-200	6.96963	855.5	98	1163	93	1437.25	680.5	21.675	32.225	0.825037
2004-05-29	20:00:00	1.2	937.25	-200	7.85651	893.25	123	1106	112	1463.25	782.75	20.8	33.2	0.806106
2004-05-29	21:00:00	1	900.5	-200	6.48489	834	102	1177	103	1407.75	737.75	20.1	35.025	0.814915
2004-05-29	22:00:00	1.3	954.5	-200	8.45617	917.75	102	1056.25	93	1510.75	761.5	19.475	36.875	0.825763
2004-05-29	23:00:00	2.7	1064.5	-200	13.6818	1106.25	142	896.75	112	1707	928.5	19.025	38.225	0.832659
2004-05-30	00:00:00	2.7	1035.25	-200	13.7812	1109.5	148	907	125	1652.25	1043.75	18.5	39.45	0.831985
2004-05-30	01:00:00	1.6	956	-200	9.13225	944.5	107	1030	107	1508.75	892	17.825	41.725	0.843965
2004-05-30	02:00:00	0.6	868.75	-200	6.51266	835.25	61	1078	76	1436.75	806.75	19.2	42	0.924786
2004-05-30	03:00:00	0.3	830.75	-200	6.22629	822.25	-200	1085.25	-200	1418	709.5	17.8	44.8	0.904758
2004-05-30	04:00:00	-200	815.25	-200	5.20175	773.5	43	1113	55	1374	711.75	17.05	47.65	0.918457
2004-05-30	05:00:00	0.1	780.5	-200	3.14513	661	25	1271	37	1299	567.5	17.2	47.175	0.917842
2004-05-30	06:00:00	0.1	780.75	-200	2.88886	645	32	1295	45	1319.75	575.25	17.275	47.55	0.929469
2004-05-30	07:00:00	0.2	827.5	-200	3.6374	690.25	48	1262.75	61	1353.25	658	18.6	44.225	0.938461
2004-05-30	08:00:00	0.3	802.75	-200	2.73727	635.25	60	1417	67	1272.25	537	20.2	37.75	0.883694
2004-05-30	09:00:00	0.3	810.75	-200	3.01584	653	52	1411	60	1269.25	486.25	22.025	31.875	0.833495
2004-05-30	10:00:00	0.4	844	-200	3.72897	695.5	58	1352.5	64	1292.25	507	25.55	25.85	0.833859
2004-05-30	11:00:00	0.3	833.25	-200	3.75971	697.25	54	1360.75	64	1294	496.25	27.475	22.85	0.824912
2004-05-30	12:00:00	0.3	831.5	-200	4.15068	719	52	1318.25	59	1298.75	501.5	28.725	20.675	0.802379
2004-05-30	13:00:00	0.1	771.25	-200	2.60045	626.25	34	1501.5	41	1210	429.75	29.075	19.625	0.777128
2004-05-30	14:00:00	0.1	783	-200	2.76422	637	41	1498	46	1215.25	438.75	29.775	18.425	0.7595
2004-05-30	15:00:00	0.2	814.5	-200	4.21513	722.5	41	1378	46	1255.75	470.75	32	15.025	0.702795
2004-05-30	16:00:00	0.6	911.75	-200	6.16098	819.25	65	1224.25	77	1367.75	589	30.275	17.05	0.723187
2004-05-30	17:00:00	0.5	894.25	-200	5.20175	773.5	65	1239	83	1339	597.75	31.7	16.2	0.745031
2004-05-30	18:00:00	0.9	962.75	-200	7.65288	884.75	84	1101.5	90	1447.25	695	29.2	19.6	0.781734
2004-05-30	19:00:00	1.1	990.25	-200	8.75041	929.5	89	1045	95	1505.75	738.75	27.45	23.8	0.857961
2004-05-30	20:00:00	1.3	1024.75	-200	10.0568	979.75	114	986.25	113	1590.75	890.75	25	26.925	0.84082
2004-05-30	21:00:00	1.5	996.5	-200	9.8105	970.5	127	993.25	128	1573	929.5	23.625	30.1	0.866311
2004-05-30	22:00:00	1.2	975.5	-200	8.40652	915.75	117	1043.75	117	1514.75	880	22.275	33.575	0.891265
2004-05-30	23:00:00	0.4	877.75	-200	5.41064	783.75	46	1180.5	64	1406.75	609.75	21.375	36.875	0.927114
2004-05-31	00:00:00	0.2	835.5	-200	4.30793	727.5	16	1213.25	28	1353.25	518.25	20.625	39.95	0.95973
2004-05-31	01:00:00	0.3	854.75	-200	4.76045	751.25	27	1107	46	1418.25	663.5	19.725	43.15	0.981198
2004-05-31	02:00:00	-200	759.25	-200	2.05612	588.25	4	1322.75	8	1286	515.25	19.725	42.375	0.963575
2004-05-31	03:00:00	-200	738.25	-200	1.43346	539	-200	1420.5	-200	1256.75	476.75	18.85	45.025	0.970276
2004-05-31	04:00:00	-200	735.75	-200	1.31041	528.25	19	1450.5	32	1254.25	476.75	18.7	45.4	0.969355
2004-05-31	05:00:00	-200	764.5	-200	2.33942	608.5	48	1303.5	57	1318.75	581	16.425	52.375	0.970863
2004-05-31	06:00:00	0.5	909.25	-200	6.48489	834	82	1031.25	60	1526.5	762.5	16.65	52.05	0.978519
2004-05-31	07:00:00	1.6	1107.5	-200	14.1816	1122.5	167	803.75	83	1801.25	1111.25	17.4	50.85	1.00174
2004-05-31	08:00:00	3.6	1251.5	-200	22.6669	1368.75	248	681	129	2119.5	1390.25	19.3	45.975	1.01855
2004-05-31	09:00:00	2.2	1174.75	-200	16.2565	1187.5	213	790.25	137	1901	1250.5	20.95	43.6	1.06831
2004-05-31	10:00:00	1.6	1111.25	-200	14.1042	1120	161	838.75	121	1790	1140.5	25.625	33.25	1.07731
2004-05-31	11:00:00	1.4	1044	-200	12.5579	1068.75	144	889	123	1682.5	942	28.875	26.025	1.01877
2004-05-31	12:00:00	1.4	1017.75	-200	13.1222	1087.75	127	908.5	120	1677	794.5	30.3	22.825	0.969518
2004-05-31	13:00:00	1.5	1060.25	-200	14.1506	1121.5	116	862.5	119	1720.75	836.25	30.9	24.4	1.07242
2004-05-31	14:00:00	1.3	1071	-200	13.7888	1109.75	124	863.5	121	1733.25	846.75	30.5	26.25	1.12778
2004-05-31	15:00:00	1.2	1006	-200	12.1343	1054.25	115	920.75	111	1635.5	768.75	30.65	23.425	1.01504
2004-05-31	16:00:00	1.8	1104.25	-200	15.7103	1170.75	150	827.25	128	1803.25	968	28.05	29.825	1.11323
2004-05-31	17:00:00	3	1196.25	-200	21.4234	1335.5	221	739	159	1971	1157.25	26.925	32.225	1.1267
2004-05-31	18:00:00	3.5	1243	-200	25.0058	1429.25	227	687	161	2092.5	1366.75	26.025	34.625	1.14853
2004-05-31	19:00:00	2.4	1123.75	-200	16.6195	1198.5	156	794.25	116	1857.5	1101.25	24.525	37.725	1.14544
2004-05-31	20:00:00	1.1	1020.25	-200	10.6873	1003	97	904	96	1716	916.25	21.725	46.9	1.20438
2004-05-31	21:00:00	0.8	1034.75	-200	7.48689	877.75	78	976.75	69	1694	824.5	19.25	68.775	1.519
2004-05-31	22:00:00	0.4	986.25	-200	5.34403	780.5	60	1063.25	58	1632.5	693.25	17.625	81.575	1.62965
2004-05-31	23:00:00	0.6	1017.25	-200	6.49044	834.25	61	986	59	1675.75	734	17.8	80.275	1.62119
2004-06-01	00:00:00	0.3	922.25	-200	4.7313	749.75	46	1084.5	45	1585.25	684.75	18.6	75.75	1.60743
2004-06-01	01:00:00	-200	830	-200	2.87839	644.333	17	1235	23	1487	524	19.6	68.4333	1.54425
2004-06-01	02:00:00	-200	804.5	-200	1.98523	583	18	1338.5	26	1493.5	526.75	17.975	76.45	1.56079
2004-06-01	03:00:00	-200	760.25	-200	1.06315	505.25	-200	1527	-200	1413.25	451.75	17.3	77.15	1.51042
2004-06-01	04:00:00	-200	782.75	-200	1.31322	528.5	16	1437	24	1434.5	465.75	16.5	82.25	1.53182
2004-06-01	05:00:00	0.1	854	-200	2.40084	612.75	39	1272.25	41	1515.25	564.5	16.825	81.3	1.54521
2004-06-01	06:00:00	0.3	984.75	-200	6.09057	816	107	987	65	1677	798.5	17.325	78.6	1.5412
2004-06-01	07:00:00	1.4	1225	-200	12.5064	1067	190	760.25	94	1921.5	1102	16.925	80.9	1.54724
2004-06-01	08:00:00	2.7	1313	-200	19.5123	1282.75	236	671	100	2179.5	1298.5	17.1	79.75	1.54199
2004-06-01	09:00:00	2.3	1199	-200	15.2359	1156	227	758	103	1958	1272	18.5	70.3	1.4826
2004-06-01	10:00:00	1.8	1182	-200	12.0402	1051	211	828.75	89	1869.75	1205.5	19.575	66.675	1.50227
2004-06-01	11:00:00	1.6	1173	-200	12.3745	1062.5	201	813.5	86	1904.5	1218.25	20.425	63.075	1.49693
2004-06-01	12:00:00	1.9	1258.75	-200	15.9457	1178	191	721.75	89	2059.5	1366.5	21.625	61.8	1.57745
2004-06-01	13:00:00	2.5	1263	-200	15.7022	1170.5	192	759.25	88	2029.25	1290.25	24	49.3	1.45095
2004-06-01	14:00:00	1.6	1155.75	-200	13.4841	1099.75	143	800	73	1883.75	1175	25.7	43.825	1.42622
2004-06-01	15:00:00	1.5	1166.75	-200	12.4477	1065	148	807.5	78	1886.25	1138.5	24.6	47.5	1.44866
2004-06-01	16:00:00	2.5	1277.5	-200	17.0949	1212.75	183	732.75	95	2040.75	1292.5	24.8	47.4	1.46282
2004-06-01	17:00:00	3.6	1341.75	-200	21.99	1350.75	216	657.25	109	2200.75	1419.25	23.75	50.475	1.46359
2004-06-01	18:00:00	3.5	1352.75	-200	19.8509	1292.25	184	683.25	95	2177.75	1325.5	23.05	53.825	1.49683
2004-06-01	19:00:00	4.8	1501	-200	27.8848	1500.5	248	588.25	101	2486.25	1517.25	21.525	65.775	1.6688
2004-06-01	20:00:00	3.7	1355.25	-200	19.7259	1288.75	221	678	88	2158.25	1390.5	21	66.875	1.64359
2004-06-01	21:00:00	2.1	1230.25	-200	15.6617	1169.25	159	737.25	77	2020.25	1274.5	20.6	68.075	1.6329
2004-06-01	22:00:00	1.6	1147.75	-200	11.9609	1048.25	136	821.5	75	1883.25	1167.75	20.475	66.85	1.59136
2004-06-01	23:00:00	2.2	1170.75	-200	13.1372	1088.25	168	821.75	81	1889.25	1132.25	20.2	65.15	1.5251
2004-06-02	00:00:00	0.8	1021	-200	9.2417	948.75	95	926.5	57	1764.25	976.75	19.525	67.975	1.52688
[truncated: 7,358 more rows]
